# Supplementary material for: Frustrated Lewis pair-catalyzed double hydroarylation of alkynes with N-substituted pyrroles
Source: Royal Society of Chemistry journal article supplement (doi:10.1039/c9cc08654d), 2020-01-01
Supplement: c9cc08654d1.pdf [file c9cc08654d1.pdf]

# Frustrated Lewis pair-catalyzed double hydroarylation of alkynes with *N*-substituted pyrroles

Jing Guo,<sup>a</sup> Odelia Cheong,<sup>b</sup> Karlee L. Bamford,<sup>a</sup> Jiliang Zhou,<sup>a</sup> and Douglas W. Stephan<sup>a\*</sup>

<sup>a</sup>*Department of Chemistry, University of Toronto, 80 St. George Street, Toronto, Ontario M5S 3H6, Canada*

<sup>b</sup>*Department of Chemistry and Biological Chemistry, Nanyang Technological University, 50 Nanyang Avenue, 639798 (Singapore)*

*\*Corresponding Author.*

Professor Douglas W. Stephan

*Email:* [dstephan@chem.utoronto.ca](mailto:dstephan@chem.utoronto.ca)

*Phone:* 416-946-3294

## Supporting Information

### Table of Contents

|                                                                                                                                                                                                |    |
|------------------------------------------------------------------------------------------------------------------------------------------------------------------------------------------------|----|
| General information .....                                                                                                                                                                      | 2  |
| Preparation of <i>N</i> - <i>tert</i> -butylpyrrole .....                                                                                                                                      | 3  |
| Preparation of <i>N</i> -(1-adamantyl)-1 <i>H</i> -pyrrole .....                                                                                                                               | 3  |
| Preparation of 1-ethynyl-2-methylbenzene <sup>3</sup> .....                                                                                                                                    | 3  |
| Preparation of 1-bromo-2-ethynylbenzene <sup>4</sup> .....                                                                                                                                     | 4  |
| Standard preparation for catalytic operations .....                                                                                                                                            | 5  |
| Typical procedure for gram-scale version of double hydroarylation .....                                                                                                                        | 5  |
| Preparation of the zwitterionic species C ( <i>t</i> BuNC <sub>4</sub> H <sub>4</sub> (3-PhC=C(H)B(C <sub>6</sub> F <sub>5</sub> ) <sub>3</sub> )) .....                                       | 5  |
| Zwitterionic species C ( <i>t</i> BuNC <sub>4</sub> H <sub>4</sub> (3-PhC=C(H)B(C <sub>6</sub> F <sub>5</sub> ) <sub>3</sub> )) catalyzed double hydroarylation.....                           | 7  |
| Zwitterionic species C ( <i>t</i> BuNC <sub>4</sub> H <sub>4</sub> (3-PhC=C(H)B(C <sub>6</sub> F <sub>5</sub> ) <sub>3</sub> )) reacted with <i>N</i> - <i>tert</i> -butylpyrrole double ..... | 8  |
| Control experiments .....                                                                                                                                                                      | 8  |
| Characterization data .....                                                                                                                                                                    | 21 |
| Single crystal X-ray crystallography .....                                                                                                                                                     | 65 |
| References .....                                                                                                                                                                               | 65 |

## General information

All preparative procedures were performed in an inert atmosphere of dry, deoxygenated ( $O_2 < 0.5$  ppm) nitrogen, using glovebox techniques or standard Schlenk techniques unless otherwise specified. Solvents were stored over activated 4Å molecular sieves following drying procedures. Benzene were purchased from Alfa Aesar. Deuterated solvents ( $C_6D_6$ , toluene- $d_8$ ) were purchased from Cambridge Isotope Laboratories, Inc. and distilled from  $CaH_2$  or sodium-benzophenone prior to use. All other deuterated solvents ( $CDCl_3$ ,  $CD_3CN$ ) were purchased from Cambridge Isotope Laboratories, Inc. and used without further purification. Phenylacetylene, 4-ethynyltoluene, 4-*tert*-butylphenylacetylene, 1-trifluoromethyl-2-ethynylbenzene, 1-trifluoromethyl-3-ethynylbenzene, 1-trifluoromethyl-4-ethynylbenzene, 1-octyne, 1-decyne and cyclopropylacetylene were obtained from Sigma Aldrich. 1-Bromo-4-ethynylbenzene, 1-chloro-4-ethynylbenzene and 1,4-diethynylbenzene were obtained from TCI Chemical. Pyrrole, 1-methylpyrrole, N-*tert*-butylamine, 2,5-dimethoxytetrahydrofuran and triisopropylsilyl chloride were purchased from Sigma Aldrich. Thin-layer chromatography (TLC) was performed on EMD Silica Gel 60 F254 aluminum plates or EMD basic Aluminium Oxide 60 F254 plastic plates. Silicycle Silia-P Flash Silica Gel was used for all column chromatography.

All NMR spectra were collected at 298 K on Agilent VnmrS 400, Agilent VnmrS 500 or Bruker 400 spectrometers in 5 mm diameter NMR tubes.  $^1H$  chemical shifts are reported relative to proteo-solvent signals ( $CDCl_3$ ,  $\delta = 7.26$  ppm;  $CD_3CN$ ,  $\delta = 1.94$  ppm). Data are reported as: chemical shift ( $\delta$  ppm), multiplicity (s = singlet, d = doublet, t = triplet, q = quartet, m = multiplet, dd = doublet of doublets, td = triplet of doublets, dt = doublet of triplets, ddd = doublet of doublet of doublets), coupling constants (Hz), integration and assignment.  $^{13}C\{^1H\}$  chemical shifts are reported relative to proteo-solvent signals ( $CDCl_3$ ,  $\delta = 77.00$  ppm;  $CD_3CN$ ,  $\delta = 118.26, 1.32$  ppm).  $^{19}F$  NMR spectra were measured at 376 MHz and  $CFCl_3$  (-63.2 ppm) was used as an external standard. Departmental facilities were used for mass spectrometry (DART: JEOL AccuTOF).

### Preparation of *N*-*tert*-butylpyrrole

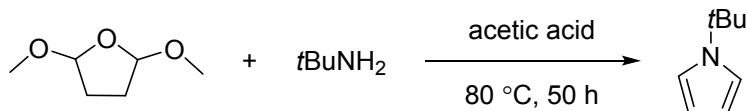

*N*-*tert*-Butylpyrrole was synthesized according to the following literature procedure.<sup>1</sup> Under a nitrogen atmosphere, a 300 mL two-necked round-bottomed flask was charged with *tert*-butylamine (14.7 g, 200 mmol), acetic acid (45.0 mL) and 2,5-dimethoxytetrahydrofuran (13.2 g, 100 mmol). After stirring at  $80\text{ }^\circ\text{C}$  for 50 h, the reaction mixture was diluted with  $\text{Et}_2\text{O}$  (100 mL). The resulting solution was washed with a 2N NaOH aqueous solution (50 mL x 3),  $\text{H}_2\text{O}$  (50 mL) and brine (50 mL), and then dried over anhydrous sodium sulfate. Filtration and evaporation of the solvent followed by vacuum distillation ( $78\text{ }^\circ\text{C}/80\text{ hPa}$ ) provided *N*-*tert*-butylpyrrole (8.3 g, 67% yield) as a colorless oil.

### Preparation of *N*-(1-adamantyl)-1*H*-pyrrole

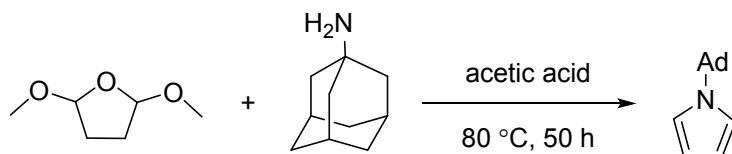

*N*-(1-adamantyl)-1*H*-pyrrole was synthesized according to the following modified literature procedure.<sup>2</sup> Under a nitrogen atmosphere, a 100 mL two-necked round-bottomed flask was charged with amantadine (1.59 g, 5 mmol), acetic acid (5.0 mL) and 2,5-dimethoxytetrahydrofuran (0.33 g, 2.5 mmol). After stirring at  $80\text{ }^\circ\text{C}$  for 50 h, the reaction mixture was diluted with  $\text{Et}_2\text{O}$  (5 mL) and ethyl acetate (10 mL). The resulting solution was washed with a 2N NaOH aqueous solution (10 mL x 3),  $\text{H}_2\text{O}$  (10 mL) and brine (50 mL), and then dried over anhydrous sodium sulfate. The residue was purified by flash chromatography (hexane) on silica gel to afford the product *N*-(1-adamantyl)-1*H*-pyrrole as a white solid.

### Preparation of 1-ethynyl-2-methylbenzene<sup>3</sup>

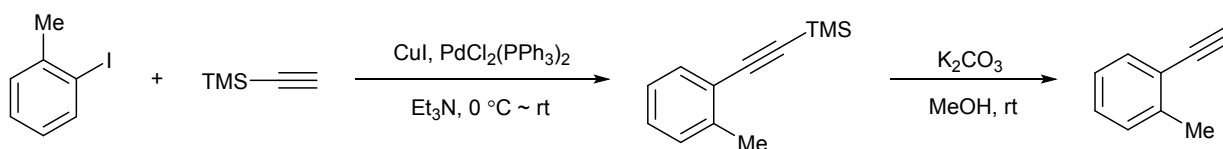

To a stirred mixture of 2-iodotoluene (2.92 mL, 22.9 mmol),  $\text{PdCl}_2(\text{PPh}_3)_2$  (782 mg, 1.17 mmol) and  $\text{CuI}$  (436 mg, 2.29 mmol) in  $\text{NEt}_3$  (20 mL), trimethylsilylacetylene (3.59 mL, 25.4 mmol) was added dropwise at 0 °C. Then, the reaction mixture was stirred at room temperature overnight. Upon completion, the mixture was filtered through a pad of celite. The filtrate was concentrated under vacuo. The residue was purified by flash chromatography on silica gel using hexane as eluent afforded the product as yellow oil. Then, to a stirred solution of trimethyl(o-tolyethynyl)silane (4.00 g, 21.2 mmol) in  $\text{MeOH}$  (10 mL) at room temperature was added  $\text{K}_2\text{CO}_3$  (1.46 g, 10.6 mmol). The reaction was stirred overnight. On completion, the reaction was quenched with water (50 mL) and extracted with  $\text{Et}_2\text{O}$  (2 x 50 mL). The combined organic layers were washed with brine, dried over  $\text{Na}_2\text{SO}_4$  and concentrated in vacuo. The residue was purified by flash chromatography on silica gel using hexane as eluent to afford the product as colourless oil.  $^1\text{H}$  NMR (400 MHz,  $\text{C}_6\text{D}_6$ )  $\delta$ : 7.51 (d,  $J$  = 7.2 Hz, 1H), 6.96 - 6.81 (m, 3H), 2.92 (s, 1H), 2.33 (s, 3H).  $^{13}\text{C}$  NMR (100 MHz,  $\text{C}_6\text{D}_6$ )  $\delta$ : 140.90, 132.88, 129.73, 128.91, 125.88, 122.62, 82.83, 81.58, 20.64.

#### Preparation of 1-bromo-2-ethynylbenzene<sup>4</sup>

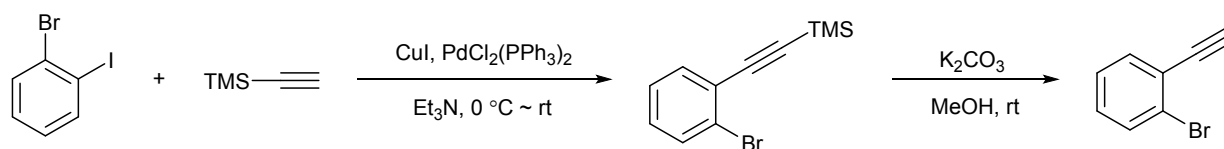

The  $\text{Pd}(\text{PPh}_3)_2\text{Cl}_2$  (522 mg, 0.74 mmol, 2 mol%) and  $\text{CuI}$  (142 mg, 0.74 mmol, 2 mol%) were added to a solution of 2-bromoiodobenzene (10.515 g, 37.17 mmol) in  $\text{Et}_2\text{NH}$  (120 mL). After 10 min a solution of trimethylsilylacetylene (6.4 mL, 55.8 mmol, 1.5 eq) in  $\text{Et}_2\text{NH}$  (3.6 mL) was added dropwise and the reaction mixture was stirred for 18 h. Upon completion, the mixture was filtered through a pad of celite, concentrated and purified by flash chromatography (hexane) to give the product as a light-yellow oil. Then, (2-bromophenylethynyl)trimethylsilane (1.621 g, 6.40 mmol) and  $\text{K}_2\text{CO}_3$  (0.885 g, 6.40 mmol, 1 eq) were stirred in  $\text{MeOH}$  (10 mL) for 2 h. The reaction was filtered, concentrated and purified by flash chromatography (hexane) to give the product as a light-yellow oil.  $^1\text{H}$  NMR (400 MHz,  $\text{C}_6\text{D}_6$ )  $\delta$ : 7.24 – 7.19 (m, 1 H), 6.62 (td,  $J$  = 7.6, 1.2, 1H), 7.29 (td,  $J$  = 7.6, 1.6, 1H), 2.93 (s, 1H).  $^{13}\text{C}$  NMR (100 MHz,  $\text{C}_6\text{D}_6$ )  $\delta$ : 134.23, 132.71, 129.95, 127.03, 126.03, 124.93, 82.56, 82.14.

## Standard preparation for catalytic operations

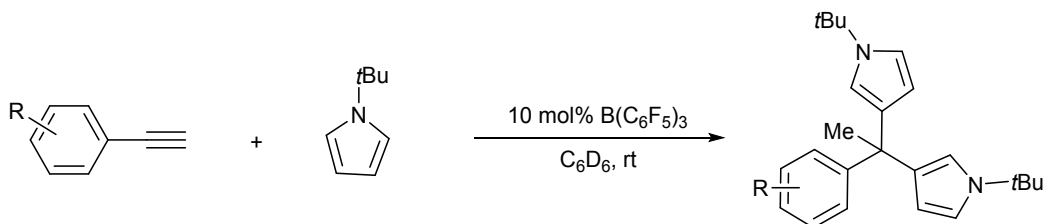

In an inert atmosphere glovebox, the mixture of alkynes (0.10 mmol) with the pyrroles (0.25 mmol) in 0.3 mL  $\text{C}_6\text{D}_6$  was added to a solution of  $\text{B}(\text{C}_6\text{F}_5)_3$  (5.1 mg, 10 mol%) in 0.2 mL  $\text{C}_6\text{D}_6$ . The reaction mixture was stirred for the specified time at room temperature and monitored by  $^1\text{H}$  NMR spectroscopy. The residue was purified by flash chromatography on silica gel to afford the product dipyrroalkanes.

## Typical procedure for gram-scale version of double hydroarylation

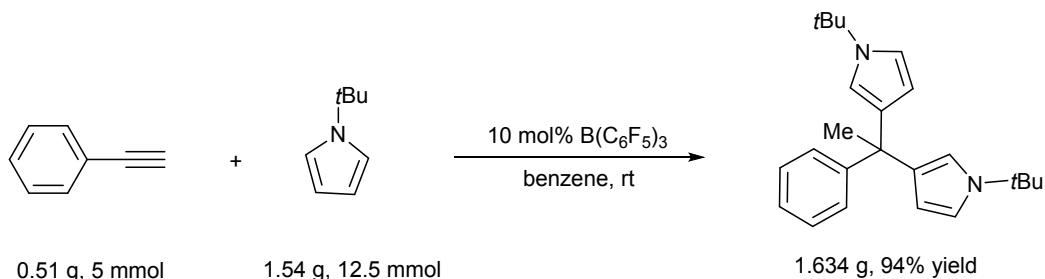

In an inert atmosphere glovebox, a flask (100 mL) was charged with phenylacetylene (**1a**, 0.51 g, 5.0 mmol). Then, 1-*tert*-butyl-1H-pyrrole (1.54 g, 12.5 mmol) and benzene (15 mL) were added. Finally, a solution of  $\text{B}(\text{C}_6\text{F}_5)_3$  (0.255 g, 10 mol%) in 10 mL benzene was added to the mixture under stirring. The reaction mixture was stirred at room temperature for 12 h. The residue was purified by flash chromatography (eluent: hexane/ethyl acetate = 12/1) on silica gel to afford the product as a white solid (1.634 g, 94% yield).

## Preparation of the zwitterionic species **C** ( $t\text{BuNC}_4\text{H}_4(3\text{-PhC}=\text{C}(\text{H})\text{B}(\text{C}_6\text{F}_5)_3)$ )

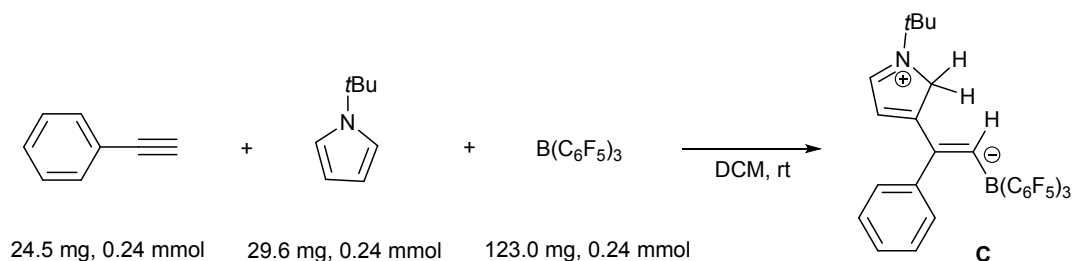

According to the literature,<sup>3</sup> in an inert atmosphere glovebox, a solution of  $B(C_6F_5)_3$  (123mg, 0.24 mmol) in 0.5 mL dichloromethane was cooled to  $-35^\circ C$  in a freezer. A solution of 1-(*tert*-butyl)-1*H*-pyrrole (29.6 mg, 0.24 mmol) in cold pentane (1.5 mL) was added in one portion followed by the dropwise addition of a solution of phenylacetylene (24.5 mg, 0.24 mmol) in cold pentane (1.5 mL). The solution was initially colorless and became more yellow over the course of the addition. After the phenylacetylene solution had been added, pentane (5 mL) was added in one portion to precipitate a yellow-white microcrystalline solid of the zwitterionic species **C** ( $tBuNC_4H_4(3-PhC=C(H)B(C_6F_5)_3)$ ).  $^{19}F$  NMR (377 MHz,  $CH_2Cl_2$ )  $\delta$ : -131.8 (d, 6F,  $^3J_{F-F} = 22$  Hz, *o*- $C_6F_5$ ), -163.2 (t, 3F,  $^3J_{F-F} = 20$  Hz, *p*- $C_6F_5$ ), -167.3 (t, 6F,  $^3J_{F-F} = 22$  Hz, *m*- $C_6F_5$ ).  $^{11}B$  NMR (128 MHz,  $CH_2Cl_2$ )  $\delta$ : -16.3 (s).

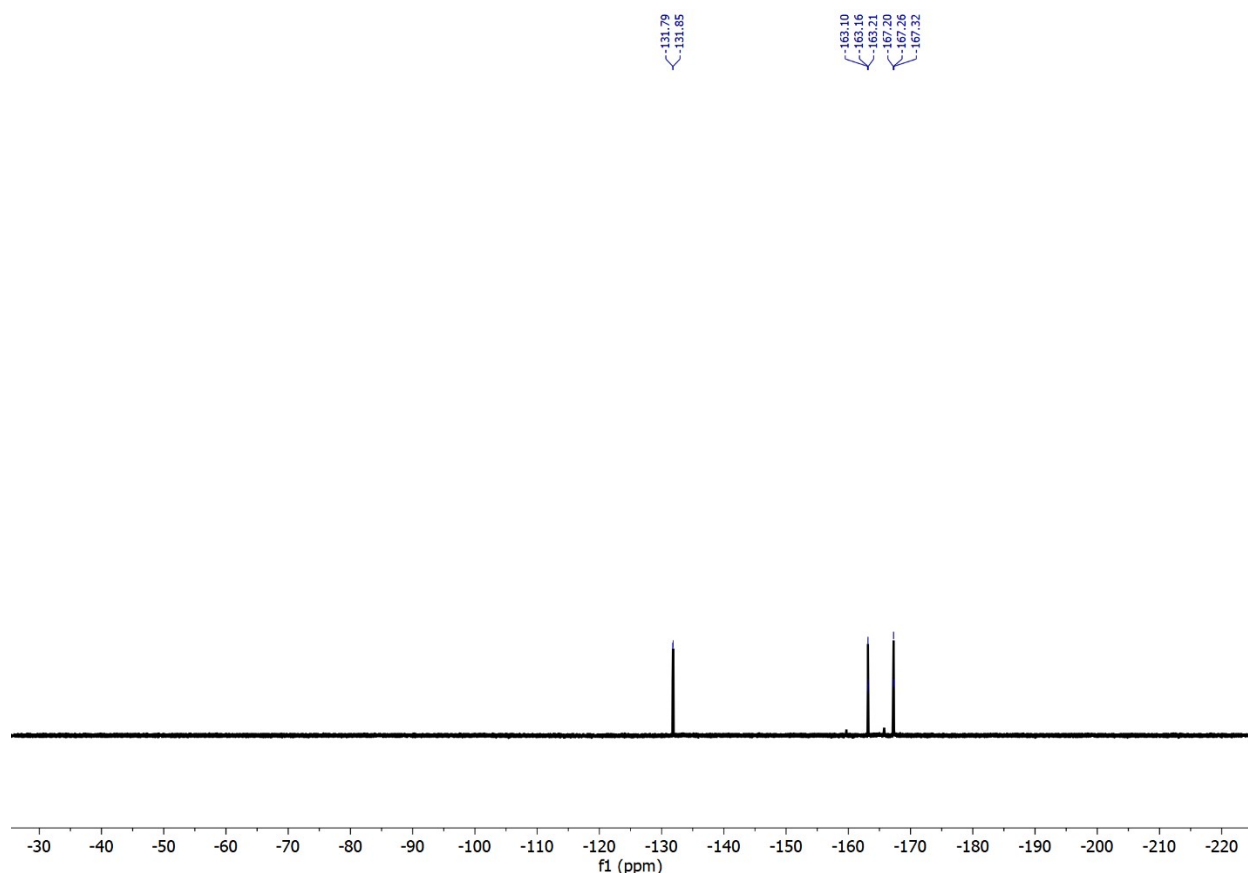

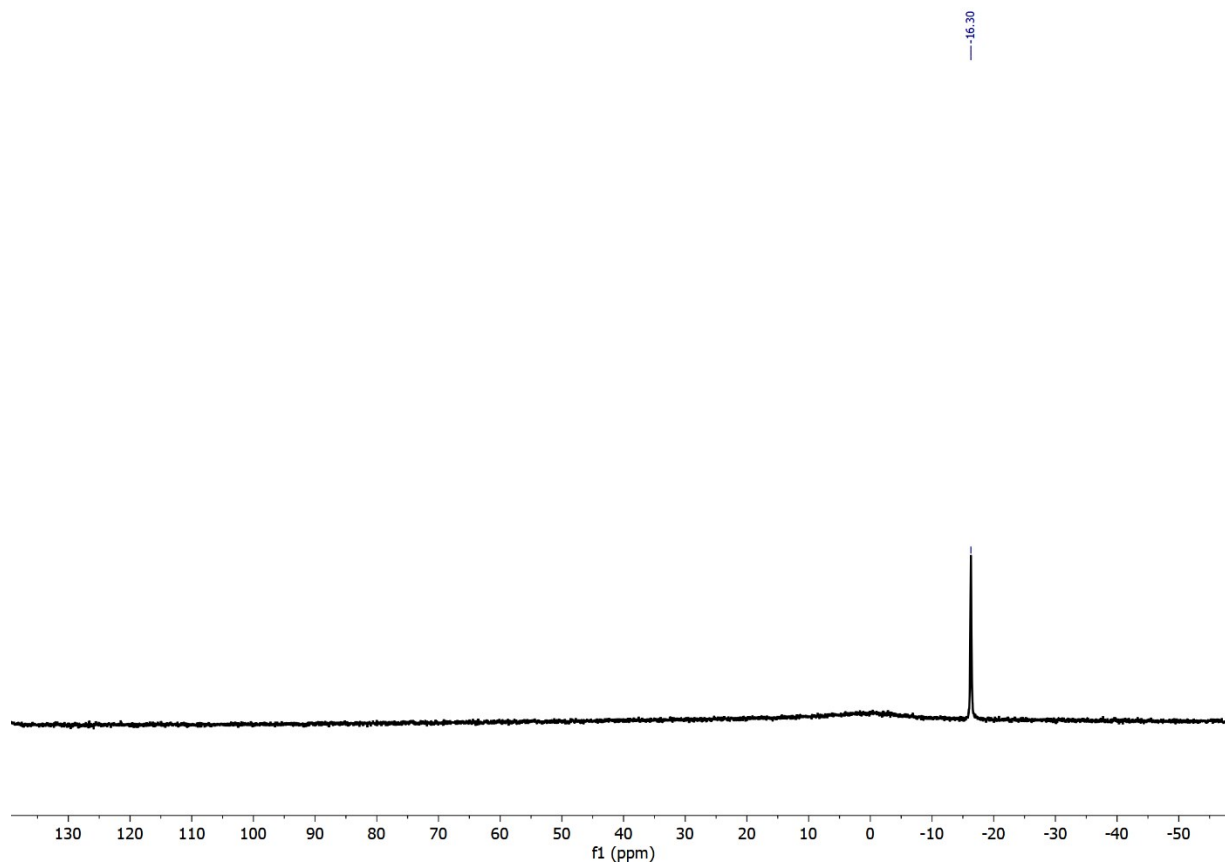

### Zwitterionic species **C** ( $t\text{BuNC}_4\text{H}_4(3\text{-PhC}=\text{C}(\text{H})\text{B}(\text{C}_6\text{F}_5)_3)$ ) catalyzed double hydroarylation

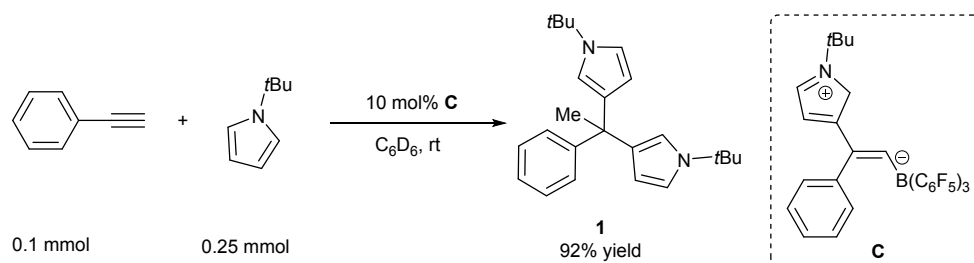

In an inert atmosphere glovebox, the mixture of phenylacetylene (0.10 mmol, 10.2 mg) with 1-*tert*-butyl-1*H*-pyrrole (0.25 mmol, 30.7 mg) in 0.3 mL  $\text{C}_6\text{D}_6$  was added to a solution of zwitterionic species **C** ( $t\text{BuNC}_4\text{H}_4(3\text{-PhC}=\text{C}(\text{H})\text{B}(\text{C}_6\text{F}_5)_3)$ ) (7.3 mg, 10 mol%) in 0.2 mL  $\text{C}_6\text{D}_6$ . The reaction mixture was stirred for the specified time at room temperature and monitored by  $^1\text{H}$  NMR spectroscopy. The residue was purified by flash chromatography on silica gel to afford the product dipyrroalkanes (32.0 mg, 92% yield).

## Zwitterionic species **C** ( $t\text{BuNC}_4\text{H}_4(3\text{-PhC}=\text{C}(\text{H})\text{B}(\text{C}_6\text{F}_5)_3)$ ) reacted with *N*-*tert*-butylpyrrole double

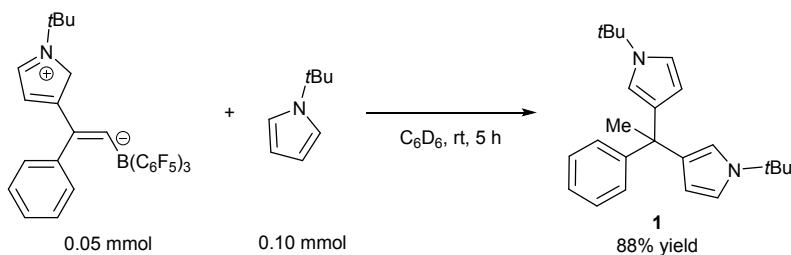

In an inert atmosphere glovebox, the solution of 1-(*tert*-butyl)-1*H*-pyrrole (0.10 mmol, 12.3 mg) in 0.3 mL  $\text{C}_6\text{D}_6$  was added to a solution of zwitterionic species **C** ( $t\text{BuNC}_4\text{H}_4(3\text{-PhC}=\text{C}(\text{H})\text{B}(\text{C}_6\text{F}_5)_3)$ ) (0.05 mmol, 36.9 mg) in 0.2 mL  $\text{C}_6\text{D}_6$ . The reaction mixture was stirred for 5 h at room temperature and monitored by  $^1\text{H}$  NMR spectroscopy. The residue was purified by flash chromatography on silica gel to afford the product dipyrroalkanes (15.3 mg, 88% yield).

## Control experiments

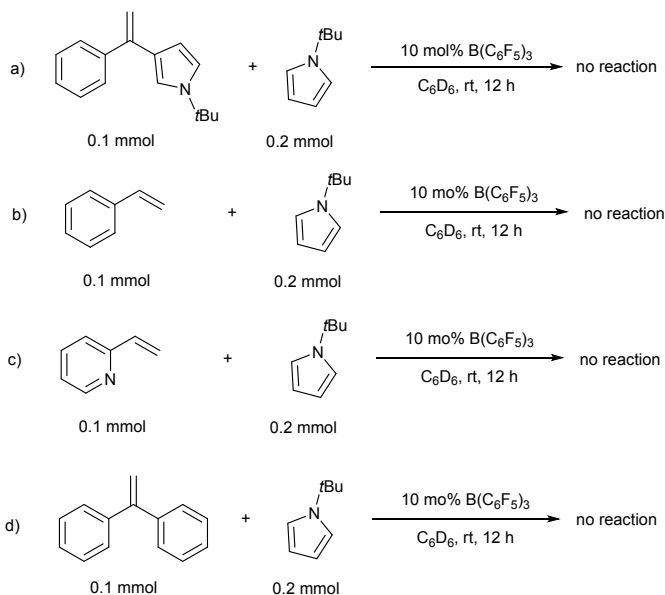

## NMR spectra of these reactions



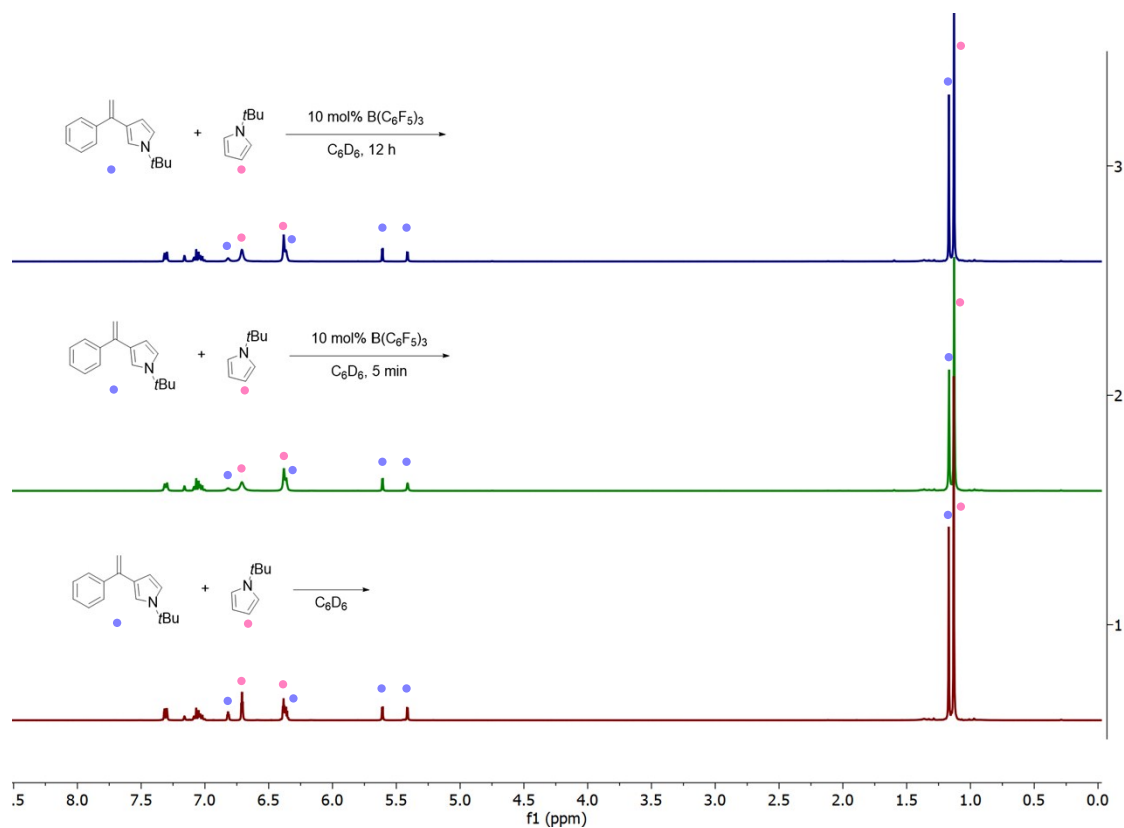

**Figure S1.** Hydroarylation of mono-hydroarylated product **1a** with *N*-*t*-butylpyrrole using 10 mol%  $\text{B}(\text{C}_6\text{F}_5)_3$  in  $\text{C}_6\text{D}_6$ , as monitored by  $^1\text{H}$  NMR (400 MHz) spectroscopy.

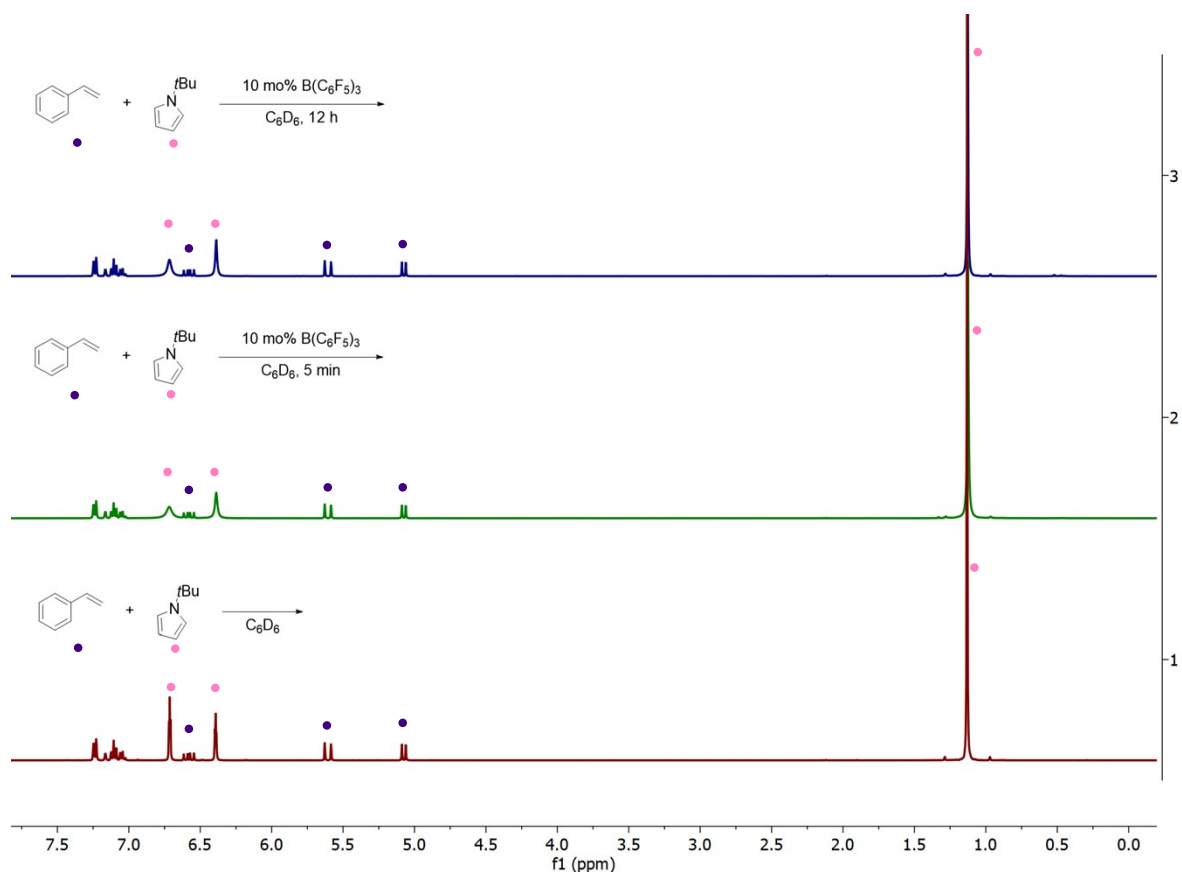

**Figure S2.** Hydroarylation of styrene with *N*-*t*-butylpyrrole using 10 mol%  $\text{B}(\text{C}_6\text{F}_5)_3$  in  $\text{C}_6\text{D}_6$ , as monitored by  $^1\text{H}$  NMR (400 MHz) spectroscopy.

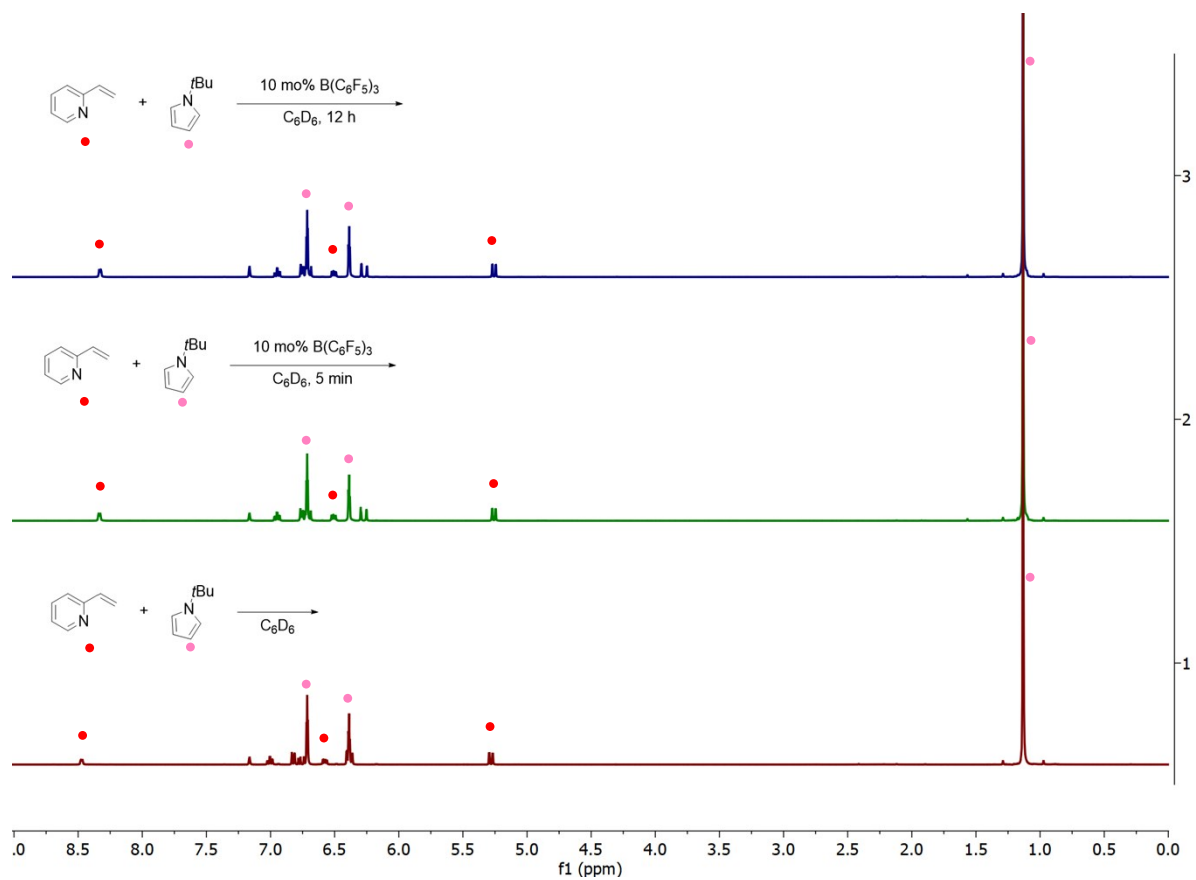

**Figure S3.** Hydroarylation of 2-vinylpyridine with *N*-*t*-butylpyrrole using 10 mol%  $\text{B}(\text{C}_6\text{F}_5)_3$  in  $\text{C}_6\text{D}_6$ , as monitored by  $^1\text{H}$  NMR (400 MHz) spectroscopy.

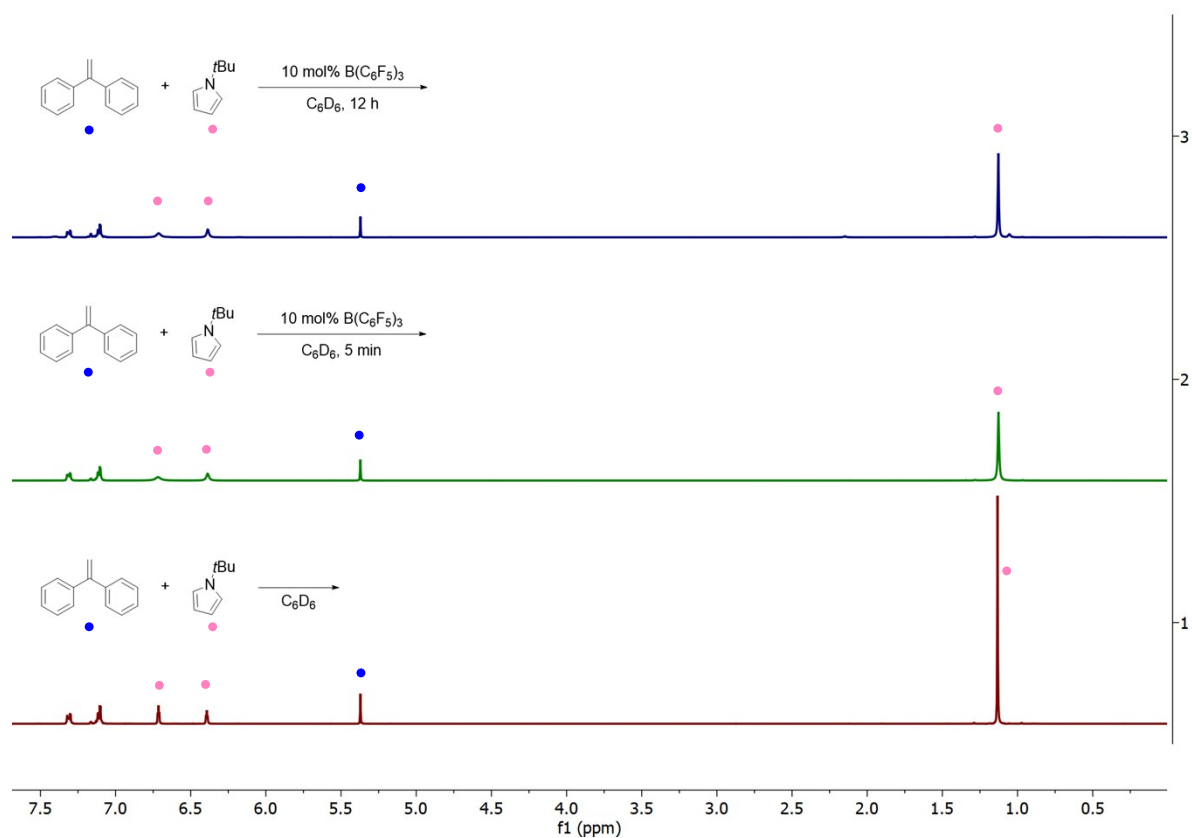

**Figure S4.** Hydroarylation of 1,1-diphenylethylene with *N*-*t*-butylpyrrole using 10 mol%  $\text{B}(\text{C}_6\text{F}_5)_3$  in  $\text{C}_6\text{D}_6$ , as monitored by  $^1\text{H}$  NMR (400 MHz) spectroscopy.

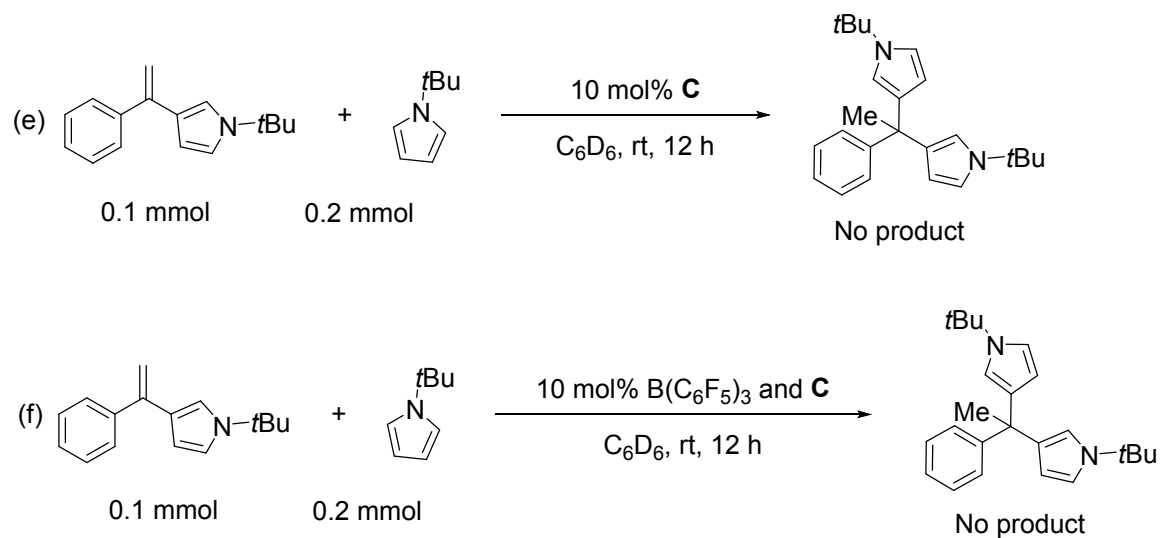

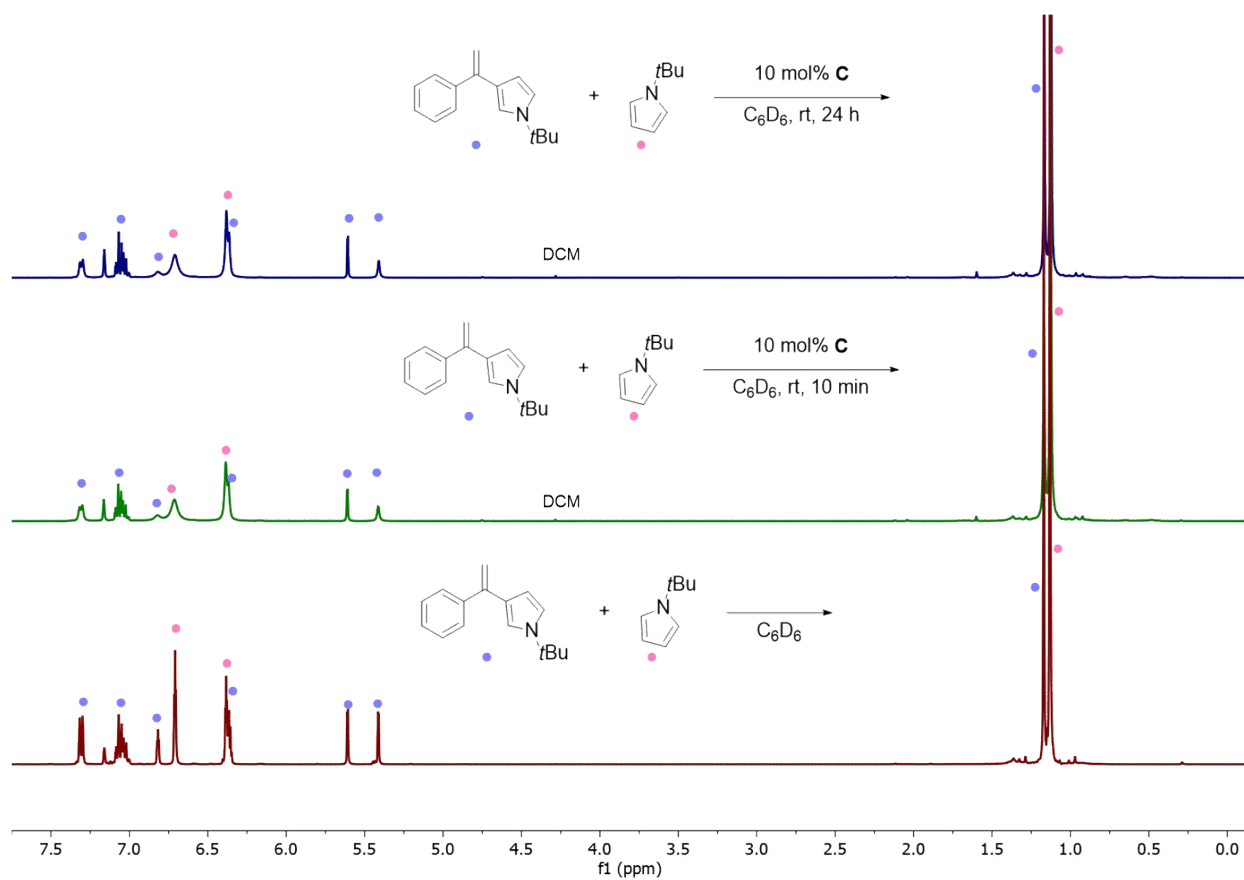

**Figure S5.** Hydroarylation of mono-hydroarylated product **1a** with *N*-*t*-butylpyrrole using 10 mol% **C** in  $\text{C}_6\text{D}_6$ , as monitored by  $^1\text{H}$  NMR (400 MHz) spectroscopy.

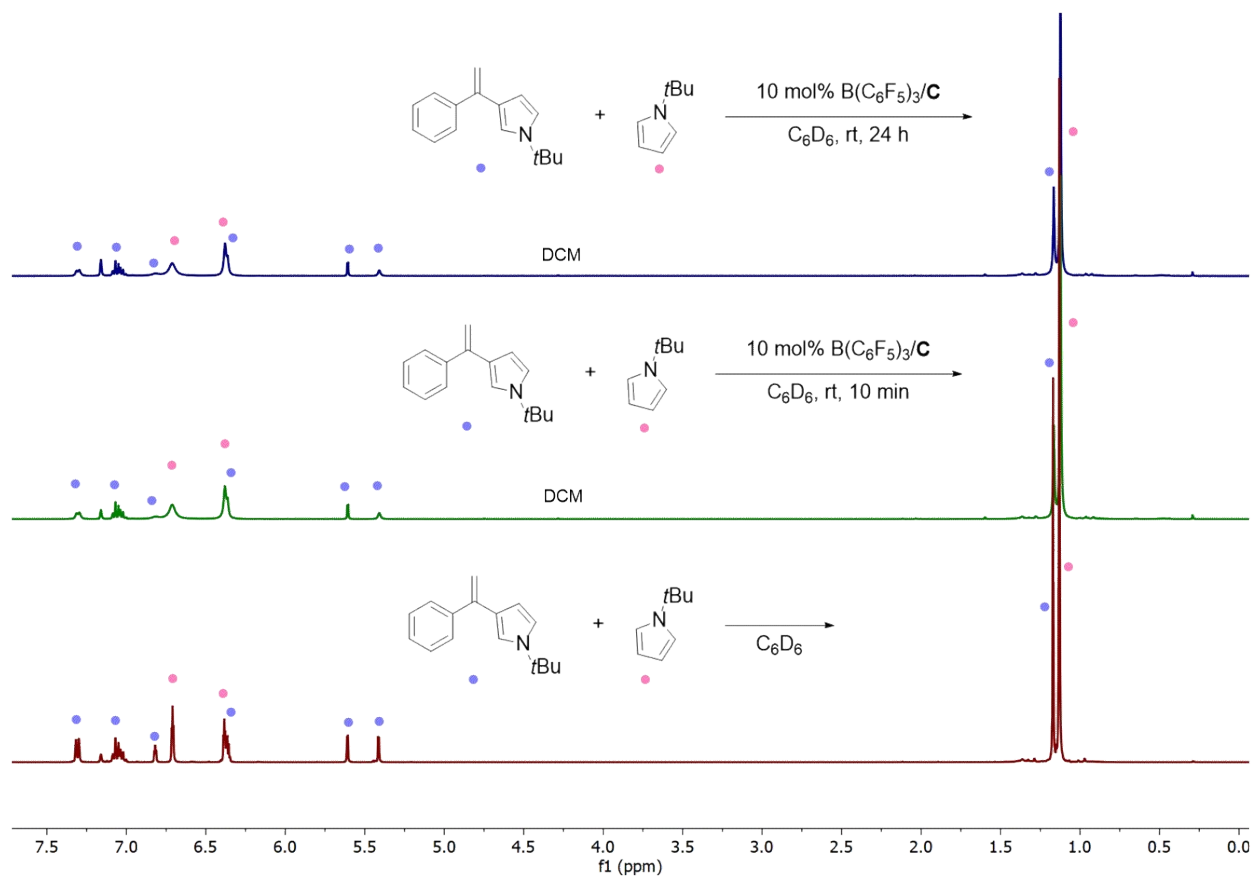

**Figure S6.** Hydroarylation of mono-hydroarylated product **1a** with *N*-*t*-butylpyrrole using 10 mol% B(C<sub>6</sub>F<sub>5</sub>)<sub>3</sub> and **C** in C<sub>6</sub>D<sub>6</sub>, as monitored by <sup>1</sup>H NMR (400 MHz) spectroscopy.

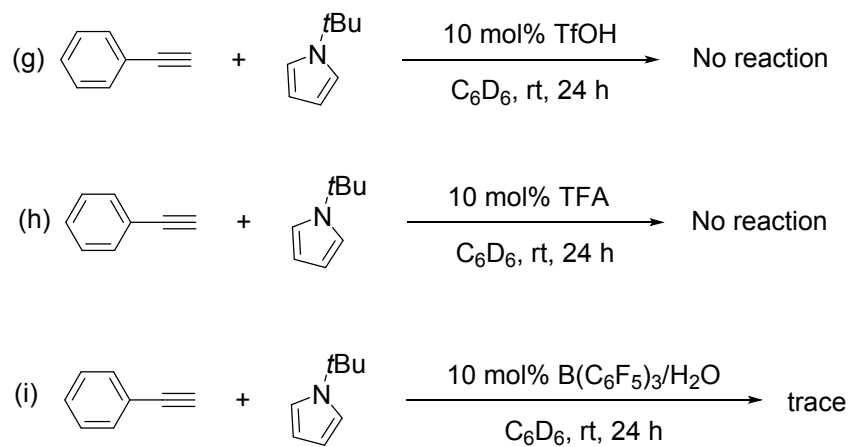

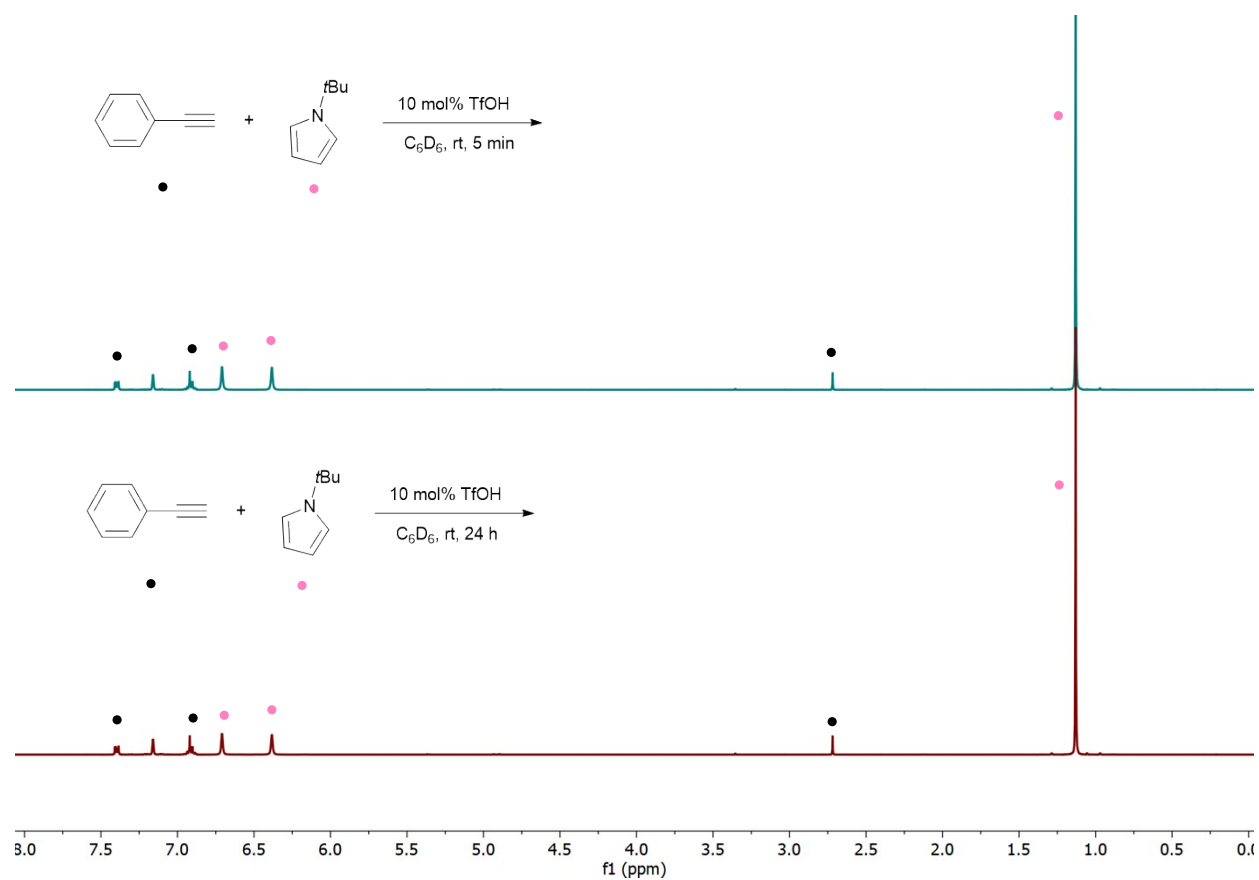

**Figure S7.** Hydroarylation of phenylacetylene with *N*-*t*-butylpyrrole using 10 mol% TfOH in  $\text{C}_6\text{D}_6$ , as monitored by  $^1\text{H}$  NMR (400 MHz) spectroscopy.

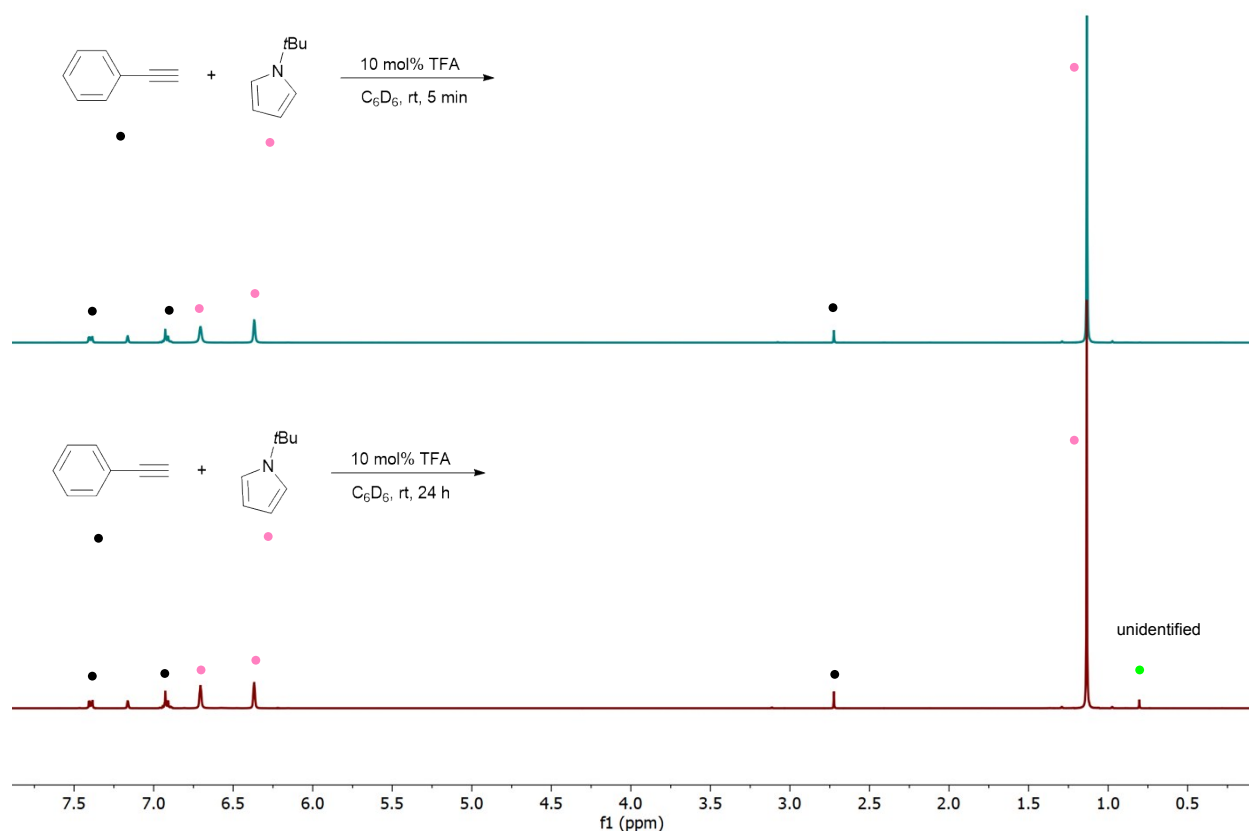

**Figure S8.** Hydroarylation of phenylacetylene with *N*-*t*-butylpyrrole using 10 mol% TFA in  $\text{C}_6\text{D}_6$ , as monitored by  $^1\text{H}$  NMR (400 MHz) spectroscopy.



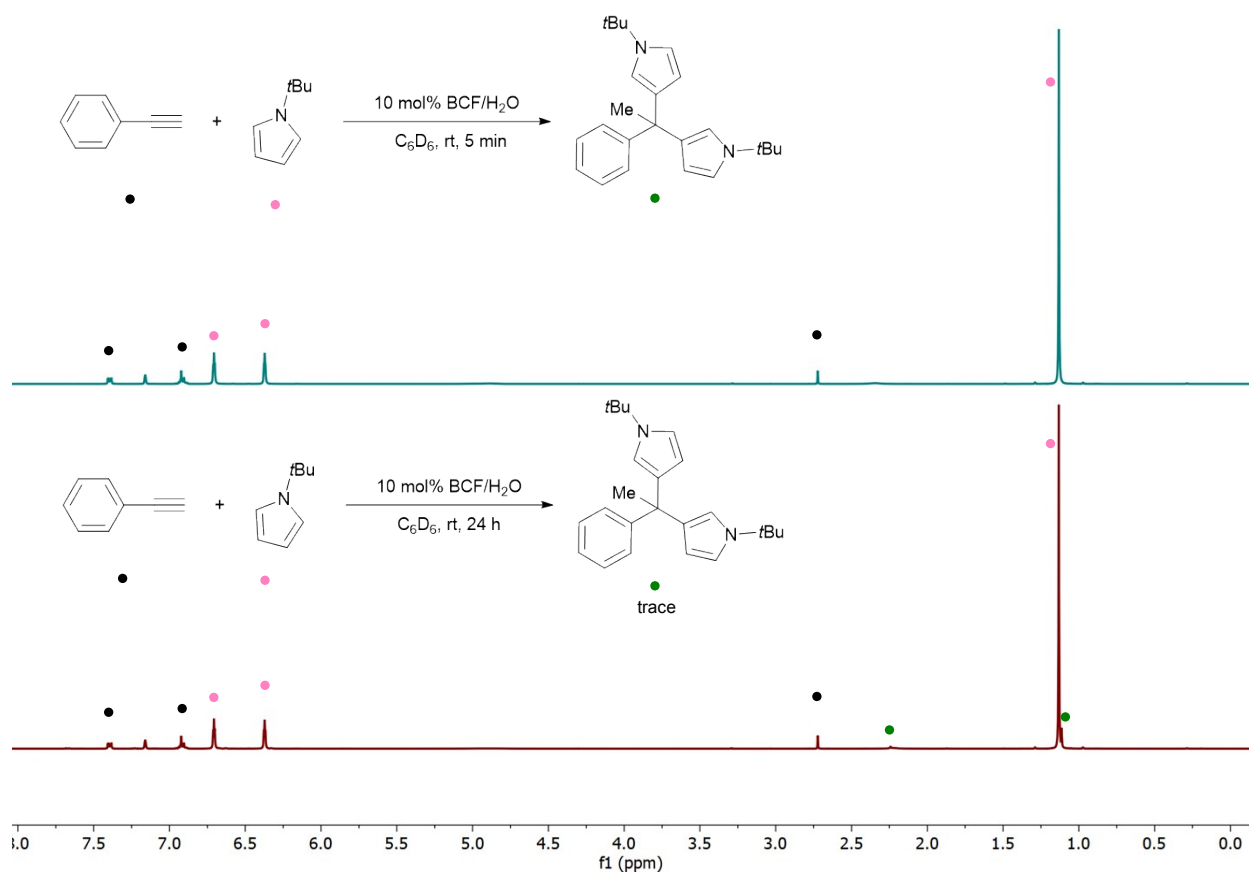

**Figure S9.** Hydroarylation of phenylacetylene with *N*-*t*-butylpyrrole using 10 mol%  $\text{B}(\text{C}_6\text{F}_5)_3$  and  $\text{H}_2\text{O}$  in  $\text{C}_6\text{D}_6$ , as monitored by  $^1\text{H}$  NMR (400 MHz) spectroscopy.

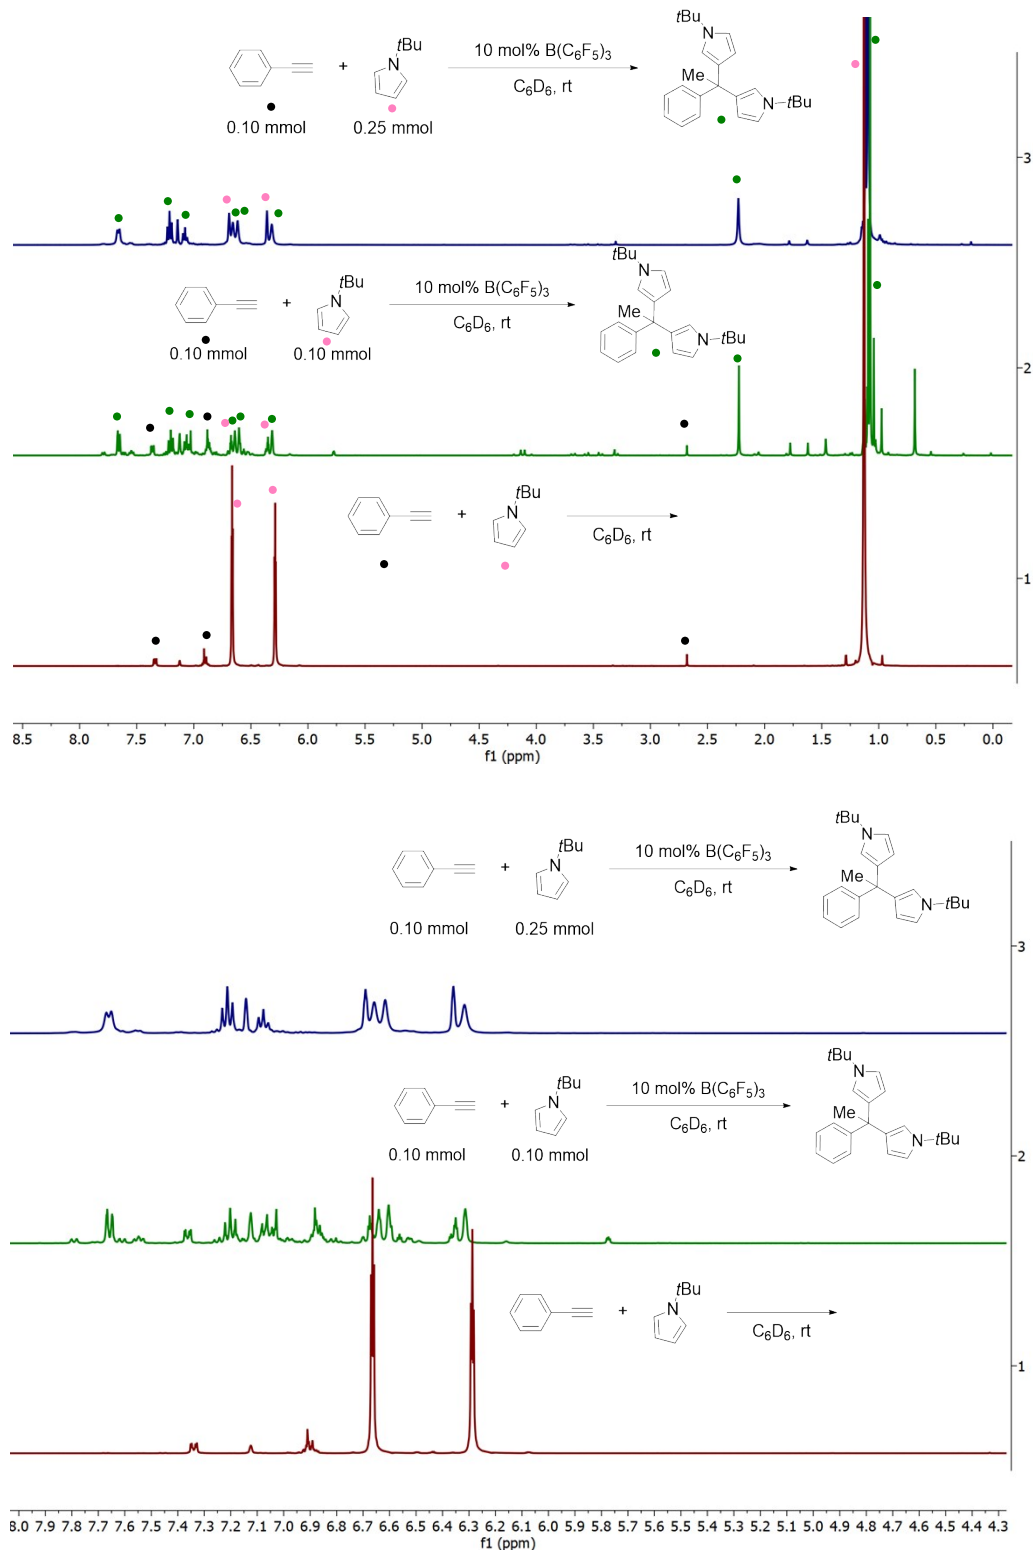

**Figure S10.** Hydroarylation of different ratio of phenylacetylene with *N*-*t*-butylpyrrole using 10 mol%  $\text{B}(\text{C}_6\text{F}_5)_3$  in  $\text{C}_6\text{D}_6$ , as monitored by  $^1\text{H}$  NMR (400 MHz) spectroscopy.

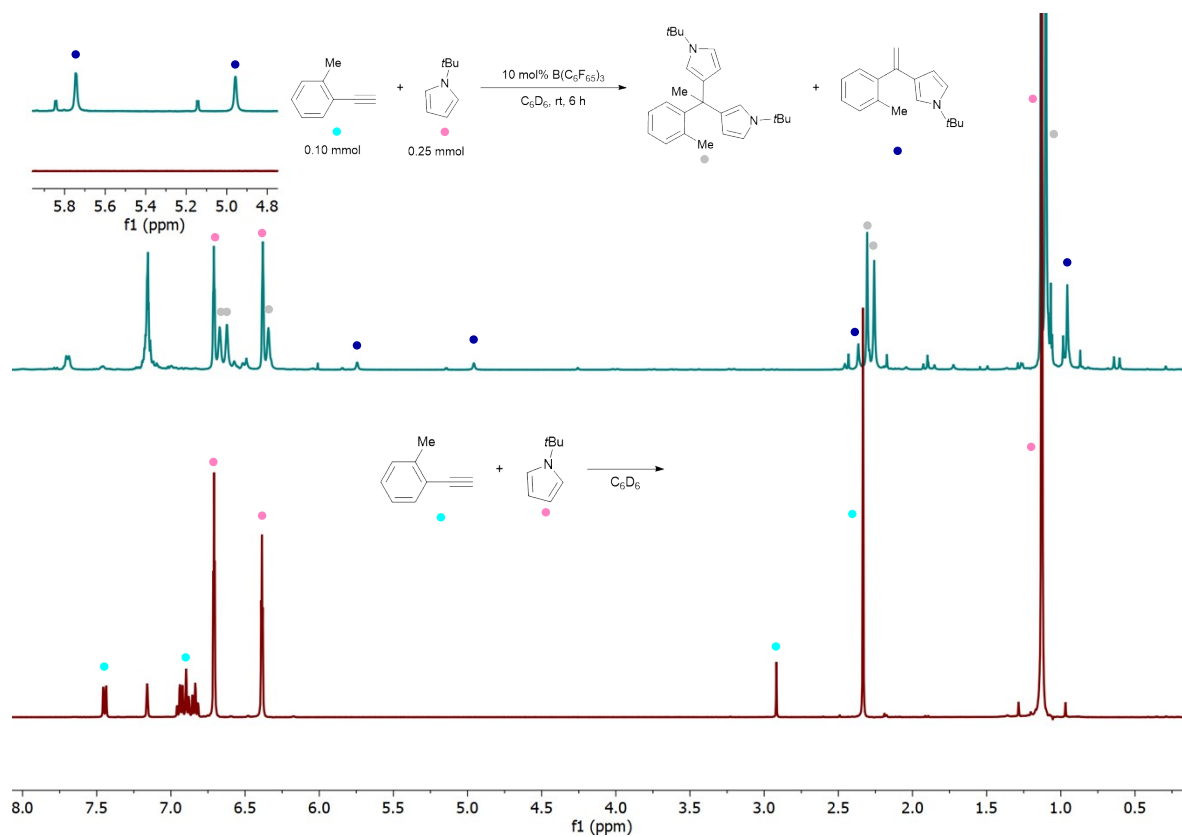

**Figure S11.** Hydroarylation of 1-ethynyl-2-methylbenzene with *N*-*t*-butylpyrrole using 10 mol%  $\text{B}(\text{C}_6\text{F}_5)_3$  in  $\text{C}_6\text{D}_6$ , as monitored by  $^1\text{H}$  NMR (400 MHz) spectroscopy.

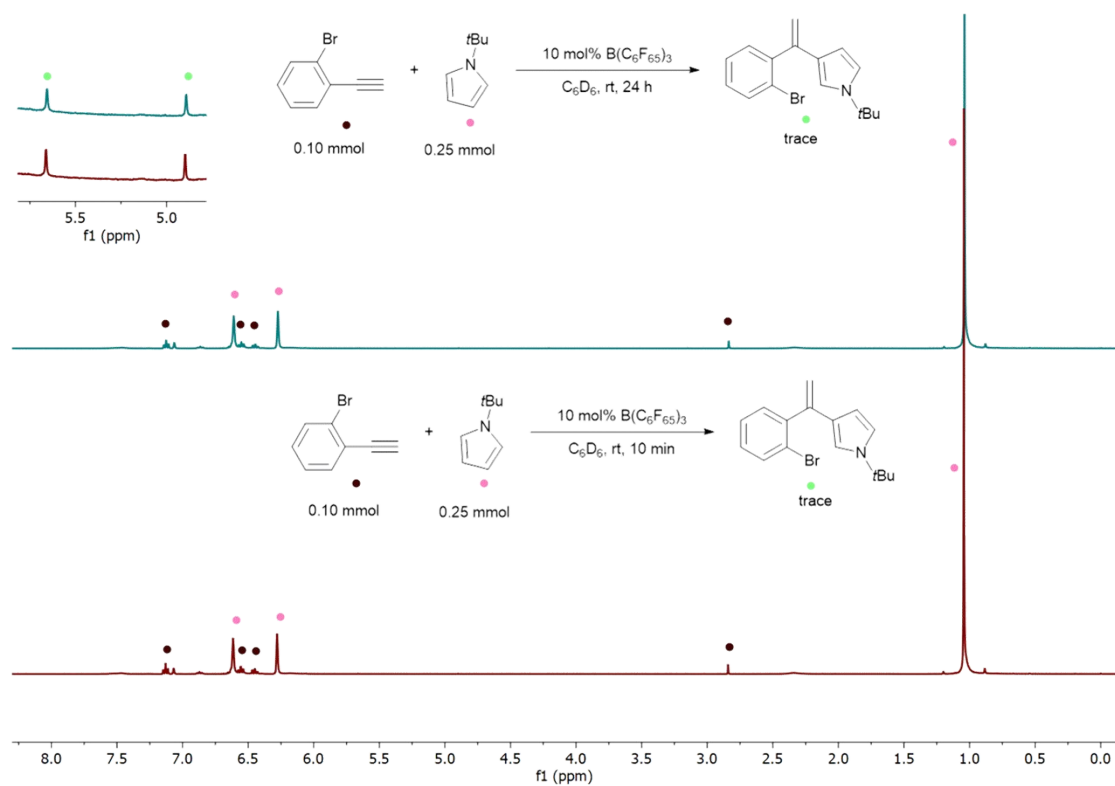

**Figure S12.** Hydroarylation of 1-ethynyl-2-bromobenzene with *N*-*t*-butylpyrrole using 10 mol%  $\text{B}(\text{C}_6\text{F}_5)_3$  in  $\text{C}_6\text{D}_6$ , as monitored by  $^1\text{H}$  NMR (400 MHz) spectroscopy.

## Characterization data

### Preparation of 3,3'-(1-phenylethane-1,1-diyl)bis(1-(*tert*-butyl)-1*H*-pyrrole) (**1**)

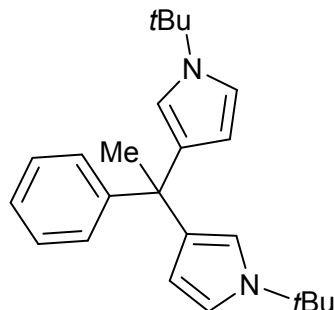

To a solution of phenylacetylene (10.2 mg, 0.1 mmol) and 1-(*tert*-butyl)-1*H*-pyrrole (30.7 mg, 0.25 mmol) in C<sub>6</sub>D<sub>6</sub> (0.3 mL) was added to a solution of B(C<sub>6</sub>F<sub>5</sub>)<sub>3</sub> (5.1 mg, 0.01 mmol, 10 mol%) in C<sub>6</sub>D<sub>6</sub> (0.2 mL). The reaction was complete after 5 hours at room temperature. The residue was purified by flash chromatography (eluent: hexane/ethyl acetate = 8/1) on silica gel to afford the product **1** as a white solid (32.0 mg, 92% yield).

<sup>1</sup>H NMR (400 MHz, CDCl<sub>3</sub>), δ: 7.30 – 7.27 (m, 2H), 7.25 – 7.21 (m, 2H), 7.16 – 7.12 (m, 1H), 6.74 (t, *J* = 2.8 Hz, 2H), 6.45 (t, *J* = 2.0 Hz, 2H), 6.45 (dd, *J* = 2.8, 2.0 Hz, 2H), 1.98 (s, 3H), 1.49 (s, 18H).

<sup>13</sup>C{<sup>1</sup>H} NMR (100 MHz, CDCl<sub>3</sub>), δ: 151.80, 133.28, 127.78, 127.21, 125.02, 116.54, 115.96, 107.60, 54.24, 43.09, 30.83, 30.71.

DEPT<sup>135</sup> NMR (100 MHz, CDCl<sub>3</sub>) δ: 127.78, 127.21, 125.03, 116.55, 115.96, 107.60, 30.83, 30.72.

MS (DART Ionization, *m/z*): 349.3 ([M+H]<sup>+</sup>).

HRMS (DART Ionization, *m/z*): Calcd. for C<sub>24</sub>H<sub>33</sub>N<sub>2</sub><sup>+</sup>, ([M+H]<sup>+</sup>): 349.26437; Found: 349.26520.

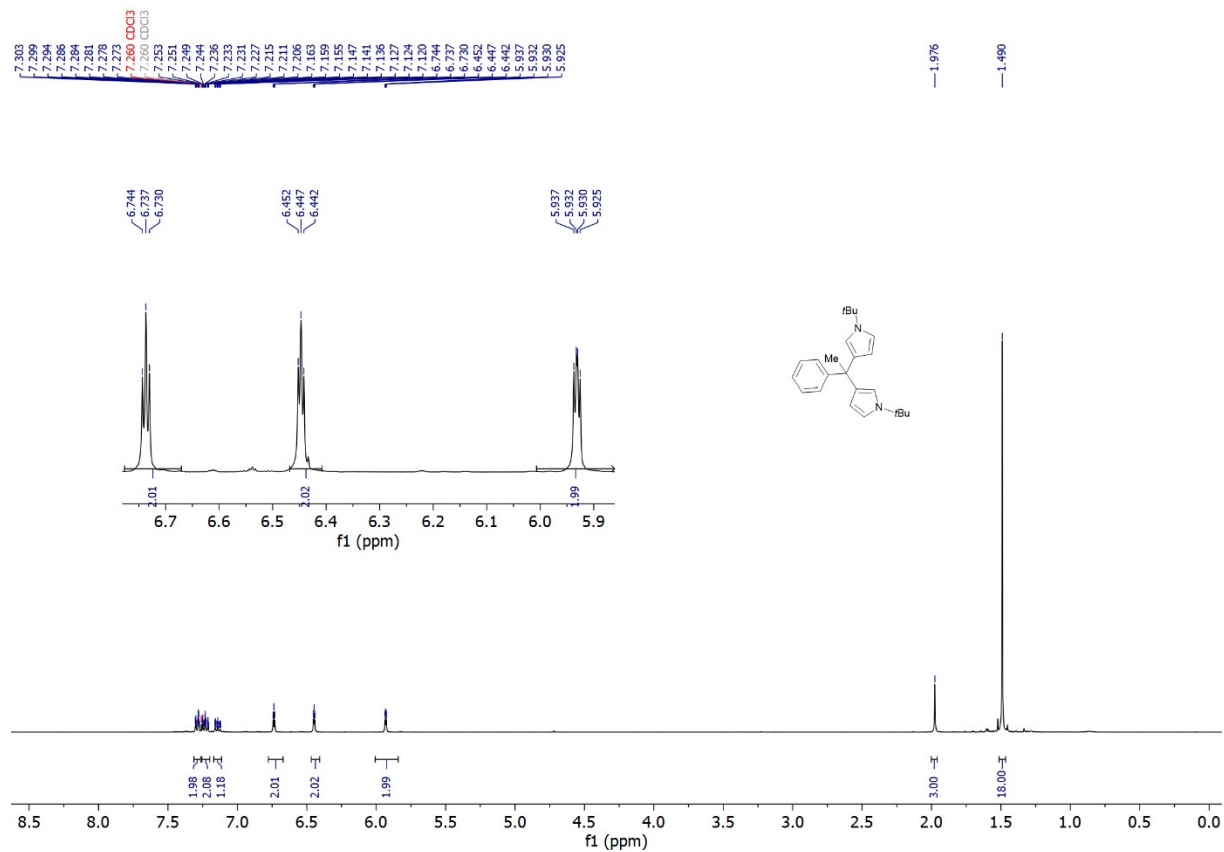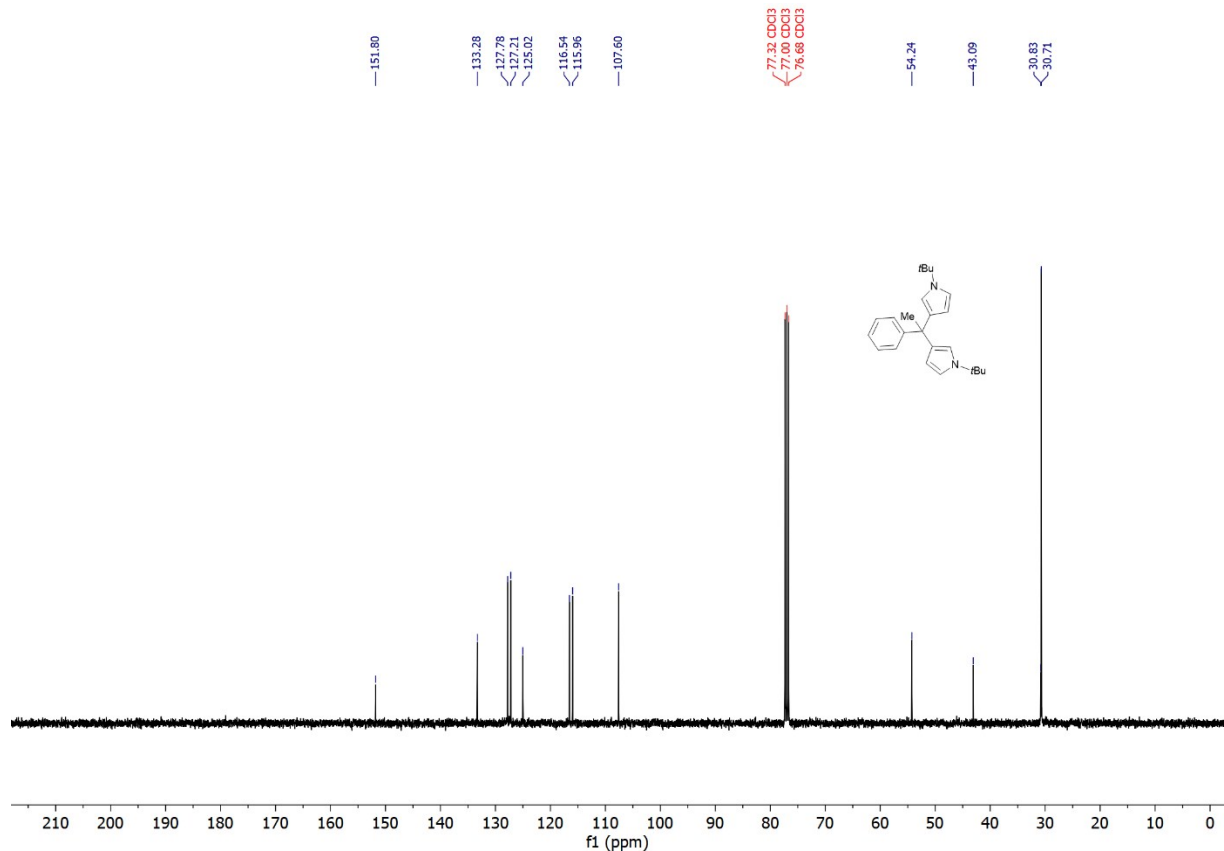

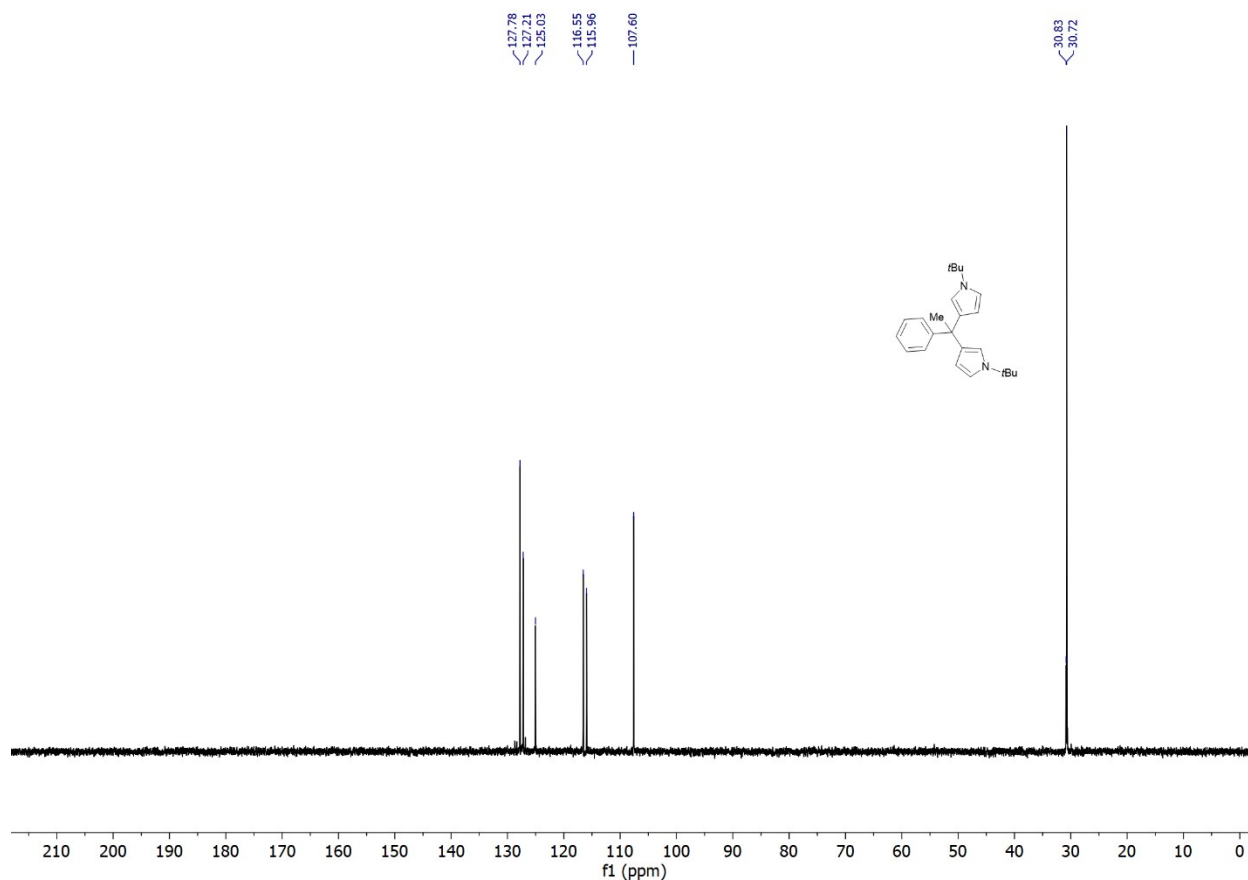

### Gram-scale of 3,3'-(1-phenylethane-1,1-diyl)bis(1-(tert-butyl)-1H-pyrrole) (1)

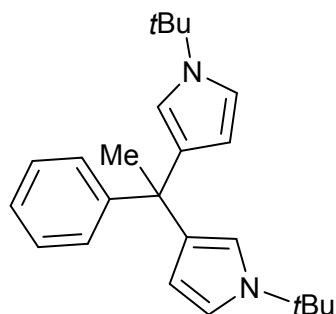

In an inert atmosphere glovebox, a flask (100 mL) was charged with phenylacetylene (0.51 g, 5.0 mmol). Then, 1-(tert-butyl)-1H-pyrrole (1.54 g, 12.5 mmol) and benzene (15 mL) were added. Finally, a solution of B(C<sub>6</sub>F<sub>5</sub>)<sub>3</sub> (0.255 g, 10 mol%) in 10 mL benzene was added to the mixture under stirring. The reaction mixture was stirred at room temperature for 12 h. The residue was purified by flash chromatography (eluent: hexane/ethyl acetate = 12/1) on silica gel to afford the product as a white solid (1.634 g, 94% yield).

$^1\text{H}$  NMR (400 MHz,  $\text{CD}_3\text{CN}$ ),  $\delta$ : 7.26 – 7.18 (m, 4H), 7.13 – 7.09 (m, 1H), 6.76 – 6.74 (m, 2H), 6.55 – 6.54 (m, 2H), 5.83 – 5.81 (m, 2H), 1.87 (s, 3H), 1.46 (s, 18H).

$^{13}\text{C}\{^1\text{H}\}$  NMR (100 MHz,  $\text{CD}_3\text{CN}$ ),  $\delta$ : 153.17, 133.86, 128.53, 128.17, 126.04, 117.87, 116.39, 108.68, 55.12, 43.84, 30.94, 30.90.

DEPT $^{135}$  NMR (100 MHz,  $\text{CD}_3\text{CN}$ )  $\delta$ : 128.54, 128.18, 126.05, 117.89, 116.40, 108.69, 30.94, 30.90.

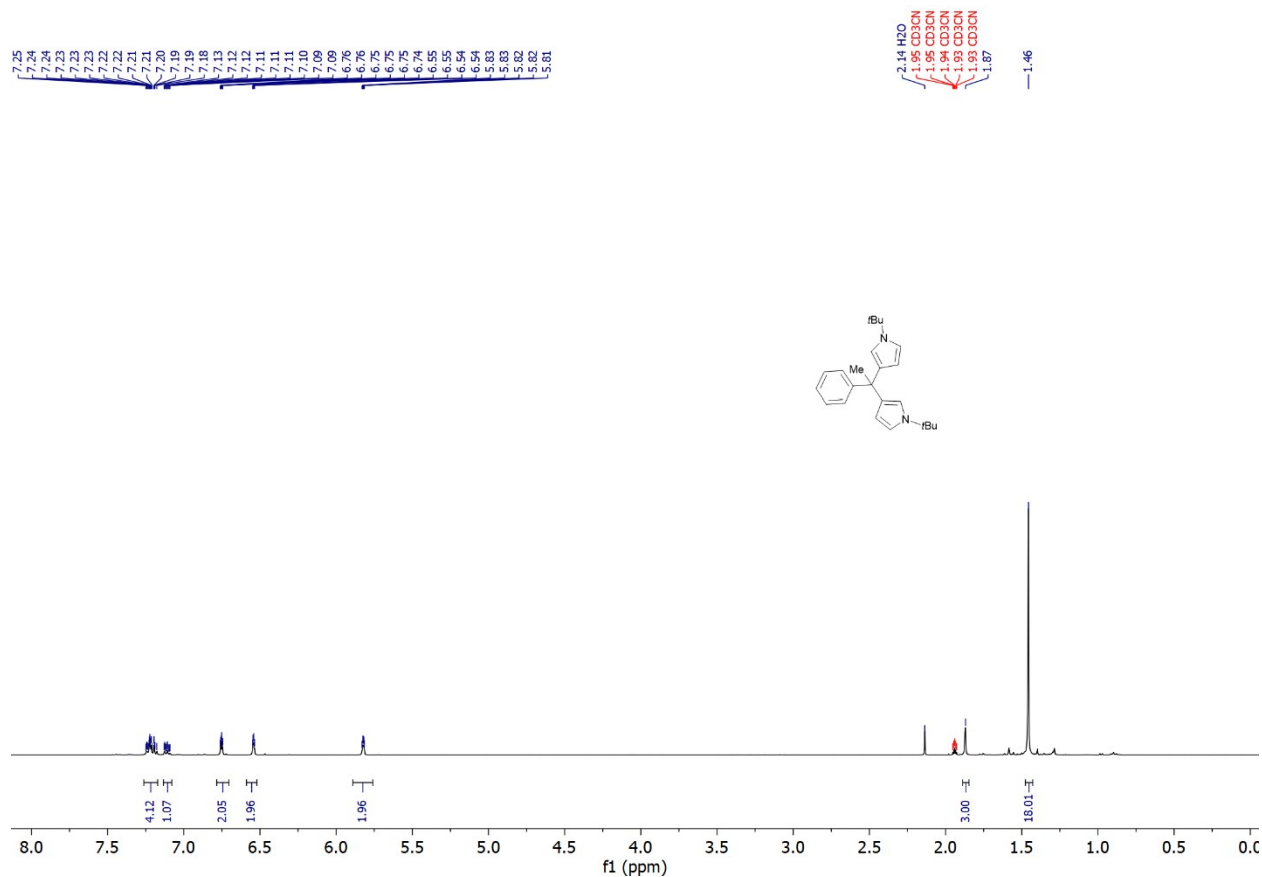



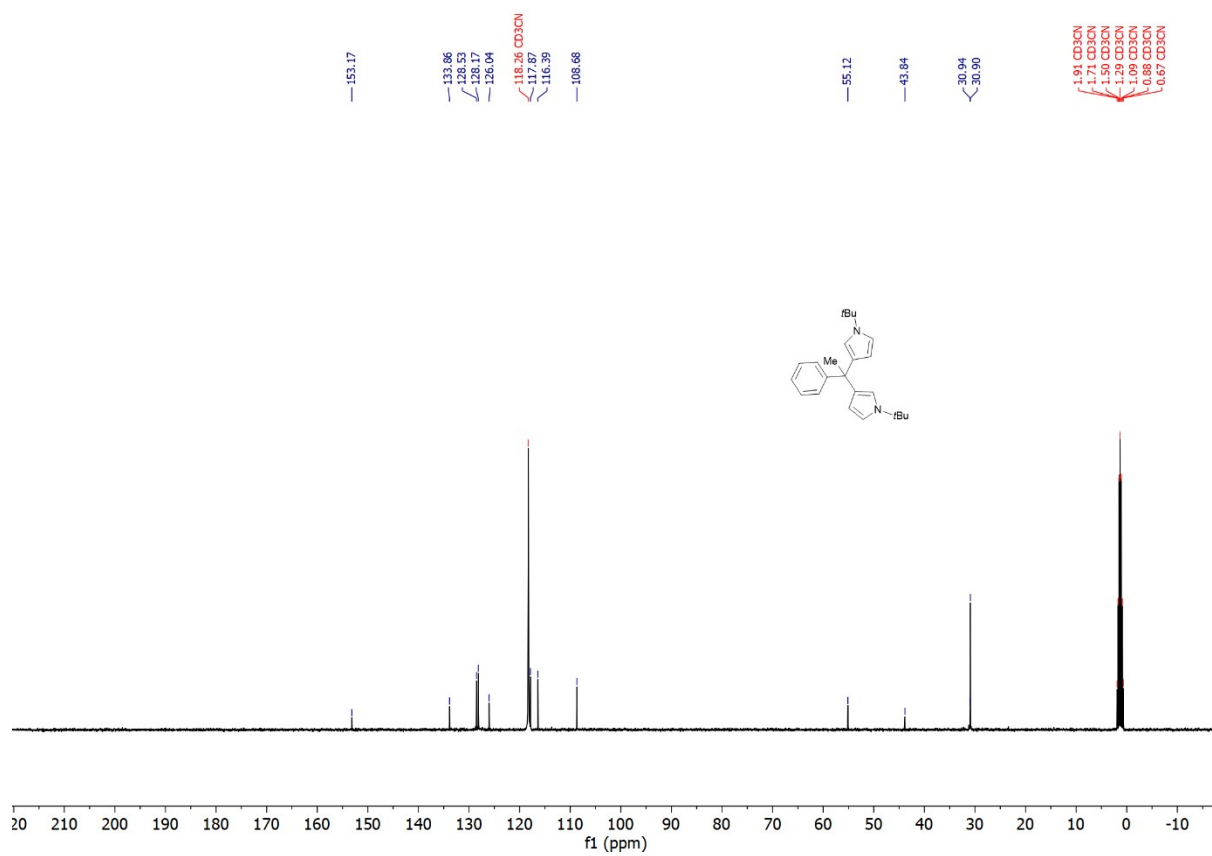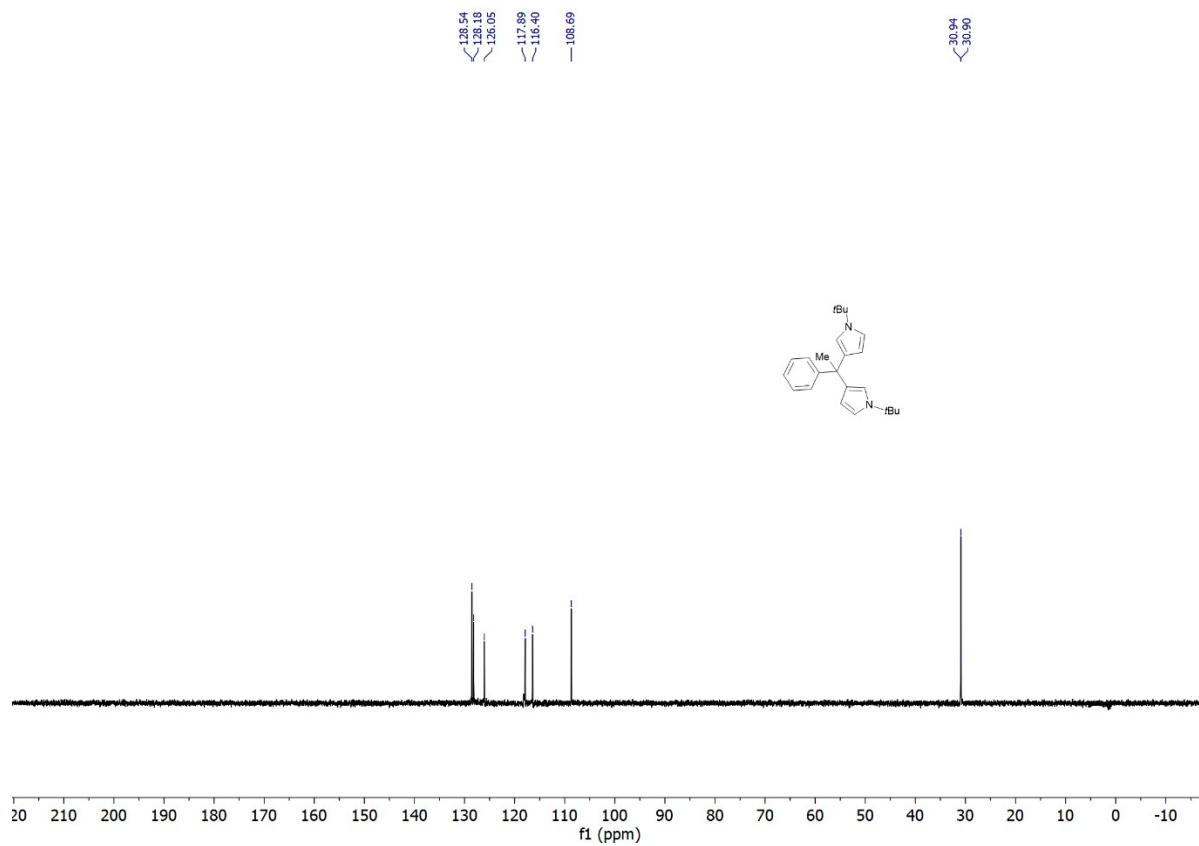

### Preparation of 1-(*tert*-butyl)-3-(1-phenylvinyl)-1*H*-pyrrole (**1a**)

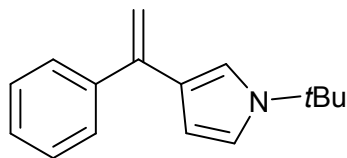

To a solution of phenylacetylene (10.2 mg, 0.1 mmol) and 1-(*tert*-butyl)-1*H*-pyrrole (30.7 mg, 0.25 mmol) in C<sub>6</sub>D<sub>6</sub> (0.3 mL) was added to a solution of InCl<sub>3</sub> (2.2 mg, 0.01 mmol, 10 mol%) in C<sub>6</sub>D<sub>6</sub> (0.2 mL). The reaction was stirred after 12 hours at room temperature. The residue was purified by flash chromatography (eluent: hexane/DCM= 10/1) on silica gel to afford the product **1a** as a colorless oil (7.2 mg, 32% yield).

<sup>1</sup>H NMR (400 MHz, C<sub>6</sub>D<sub>6</sub>), δ: 7.33 – 7.30 (m, 2H), 7.07 – 7.20 (m, 3H), 6.82 (dd, *J* = 2.8, 2.0 Hz, 1H), 6.40 – 6.35 (m, 2H), 5.61 (d, *J* = 2.0 Hz, 1H), 5.42 (d, *J* = 2.0 Hz, 1H), 1.17 (s, 9H).

<sup>13</sup>C{<sup>1</sup>H} NMR (100 MHz, C<sub>6</sub>D<sub>6</sub>), δ: 145.73, 142.50, 132.59, 128.55, 127.89, 127.16, 120.15, 117.65, 113.84, 107.01, 56.81, 31.36.

MS (DART Ionization, *m/z*): 226.16 ([M+H]<sup>+</sup>).

HRMS (DART Ionization, *m/z*): Calcd. for C<sub>16</sub>H<sub>20</sub>N<sup>+</sup>, ([M+H]<sup>+</sup>): 226.15903; Found: 226.15910.

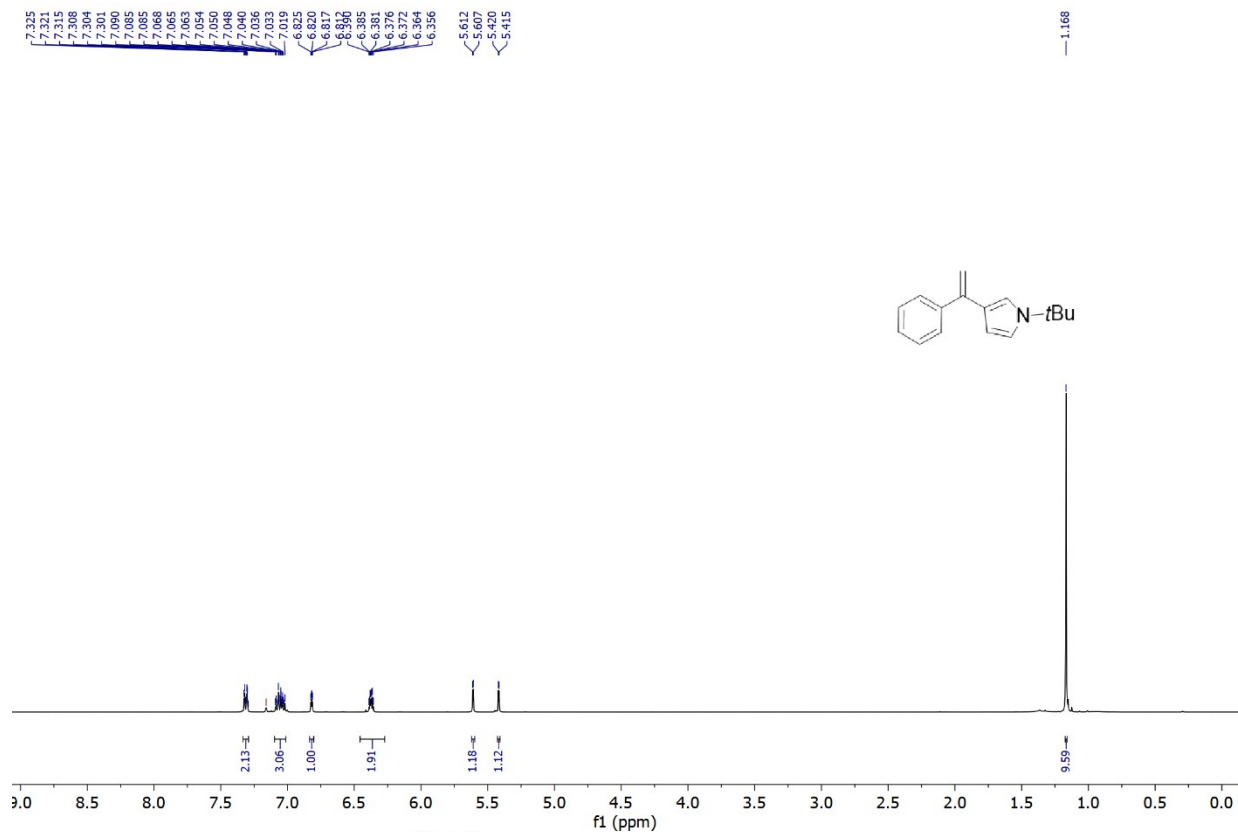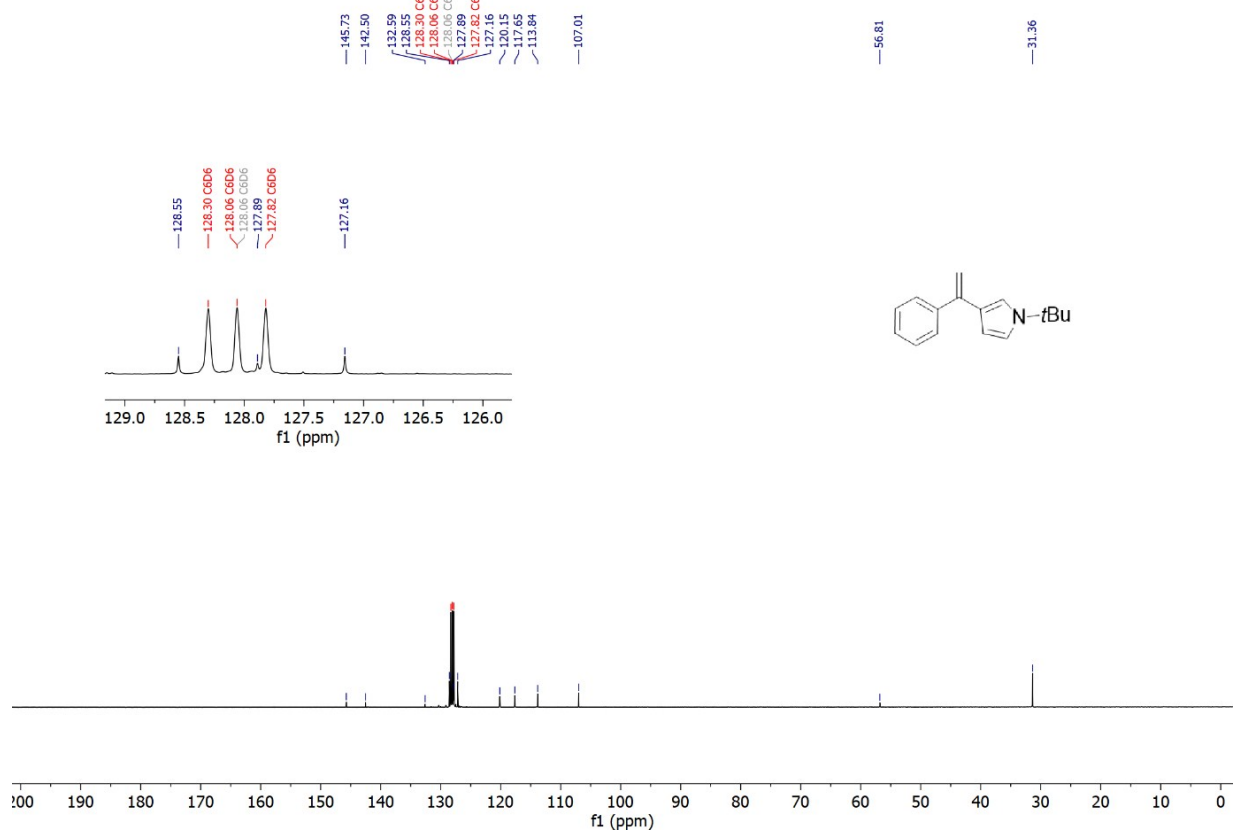

## Preparation of 3,3'-(1-(*p*-tolyl)ethane-1,1-diyl)bis(1-(*tert*-butyl)-1*H*-pyrrole) (**2**)

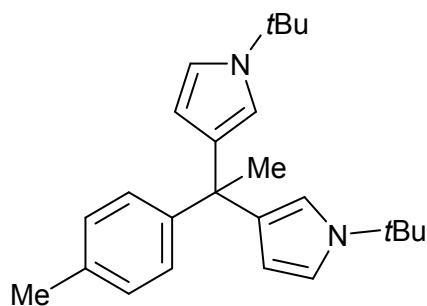

To a solution of 4-ethynyltoluene (11.6 mg, 0.1 mmol) and 1-(*tert*-butyl)-1*H*-pyrrole (30.7 mg, 0.25 mmol) in  $C_6D_6$  (0.3 mL) was added to a solution of  $B(C_6F_5)_3$  (5.1 mg, 0.01 mmol, 10 mol%) in  $C_6D_6$  (0.2 mL). The reaction was complete after 5 hours at room temperature. The residue was purified by flash chromatography (eluent: hexane/ethyl acetate = 8/1) on silica gel to afford the product **2** as a colourless oil (27.5 mg, 76% yield).

$^1H$  NMR (400 MHz,  $CD_3CN$ ),  $\delta$ : 7.12 – 7.00 (m, 2H), 7.01 (d,  $J$  = 3.6, 2H), 6.74 (t,  $J$  = 2.4 Hz, 2H), 6.54 (t,  $J$  = 2.4 Hz, 2H), 5.83 – 5.80 (m, 2H), 2.27 (s, 3H), 1.85 (s, 3H), 1.46 (s, 18H).

$^{13}C\{^1H\}$  NMR (100 MHz,  $CD_3CN$ ),  $\delta$ : 150.15, 135.29, 133.99, 128.78, 128.43, 117.78, 116.28, 108.65, 55.06, 43.43, 30.98, 30.88, 20.88.

DEPT $^{135}$  NMR (100 MHz,  $CD_3CN$ )  $\delta$ : 128.78, 128.43, 117.79, 116.28, 108.65, 30.98, 30.88, 20.88.

MS (DART Ionization,  $m/z$ ): 363.3 ( $[M+H]^+$ ).

HRMS (DART Ionization,  $m/z$ ): Calcd. for  $C_{25}H_{35}N_2^+$ , ( $[M+H]^+$ ): 363.28002; Found: 363.27968.

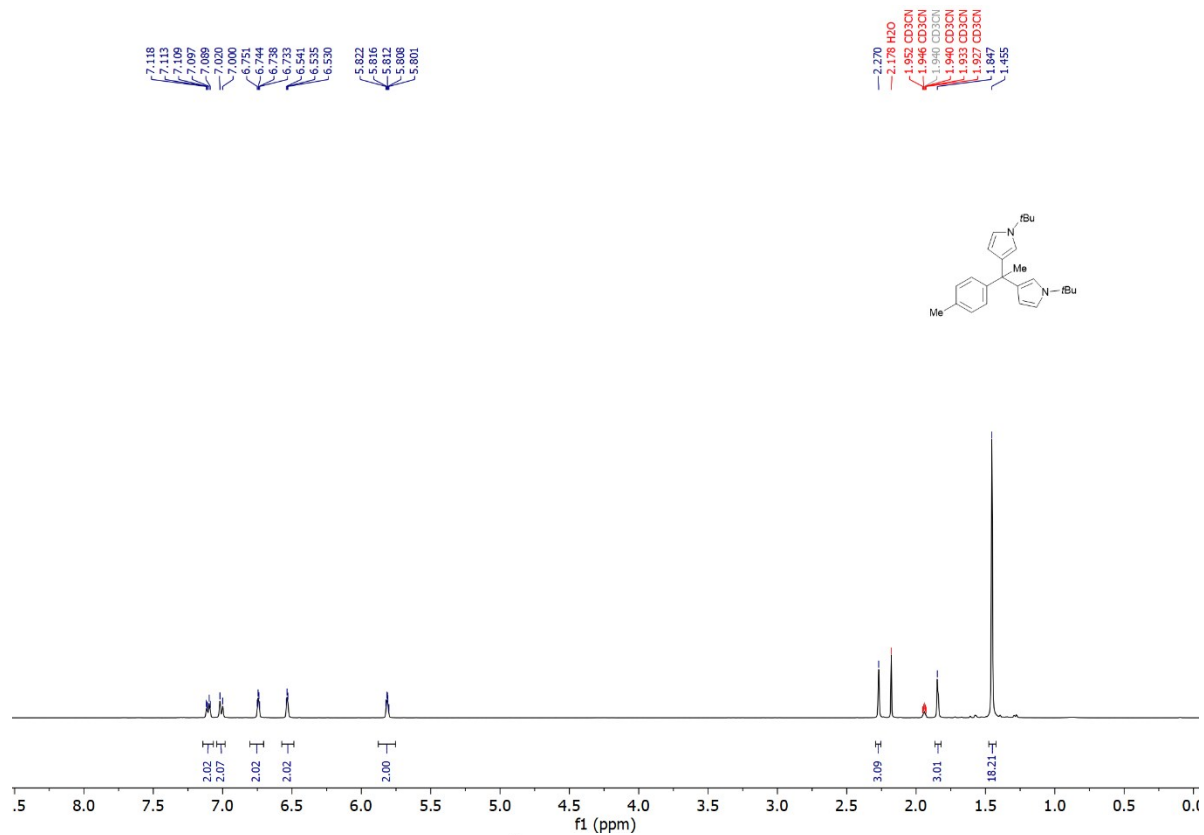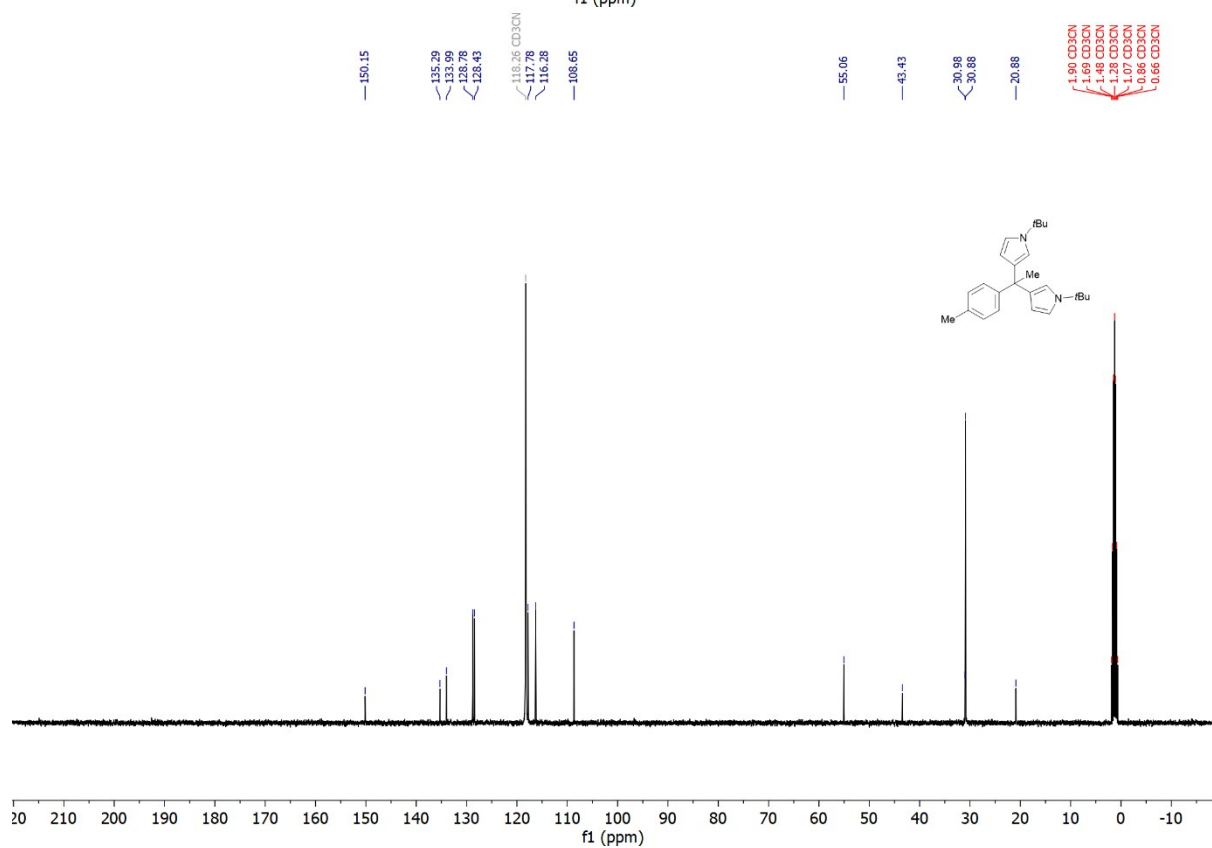

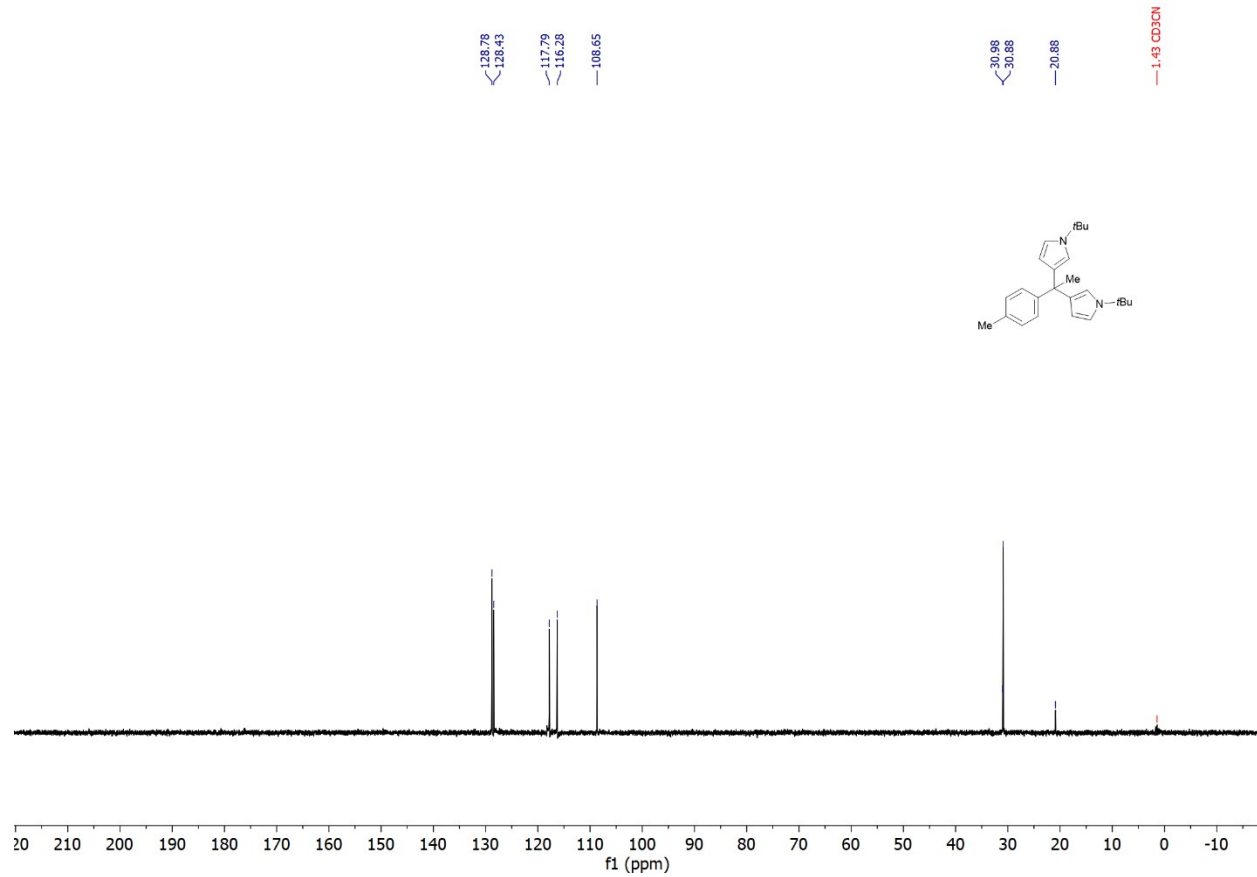

**Preparation of 3,3'-(1-(4-(*tert*-butyl)phenyl)ethane-1,1-diyl)bis(1-(*tert*-butyl)-1*H*-pyrrole) (3)**

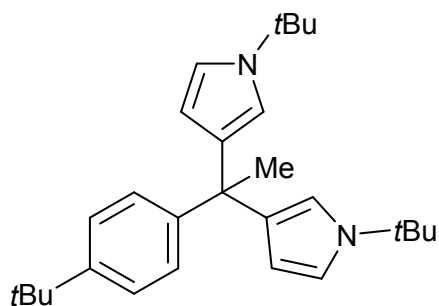

To a solution of 4-*tert*-butylphenylacetylene (15.8 mg, 0.1 mmol) and 1-(*tert*-butyl)-1*H*-pyrrole (30.7 mg, 0.25 mmol) in C<sub>6</sub>D<sub>6</sub> (0.3 mL) was added to a solution of B(C<sub>6</sub>F<sub>5</sub>)<sub>3</sub> (5.1 mg, 0.01 mmol, 10 mol%) in C<sub>6</sub>D<sub>6</sub> (0.2 mL). The reaction was complete after 5 hours at room temperature. The residue was purified by flash chromatography (eluent: hexane/ethyl acetate = 8/1) on silica gel to afford the product **3** as a white solid (35.0 mg, 86% yield).

<sup>1</sup>H NMR (400 MHz, CD<sub>3</sub>CN), δ: 7.26 – 7.23 (m, 2H), 7.16 – 7.12 (m, 2H), 6.76 (t, *J* = 3.2 Hz, 2H), 6.54 (t, *J* = 2.0 Hz, 2H), 5.83 – 5.80 (m, 2H), 1.86 (s, 3H), 1.46 (s, 18H), 1.29 (s, 9H).

<sup>13</sup>C{<sup>1</sup>H} NMR (100 MHz, CD<sub>3</sub>CN), δ: 150.19, 148.60, 133.88, 128.14, 125.03, 117.82, 116.22, 108.71, 55.07, 43.36, 34.79, 31.67, 31.65, 30.90, 30.89.

DEPT<sup>135</sup> NMR (100 MHz, CD<sub>3</sub>CN) δ: 128.19, 125.09, 117.87, 116.27, 108.76, 31.73, 31.70, 30.96, 30.93.

MS (DART Ionization, *m/z*): 405.3 ([M+H]<sup>+</sup>).

HRMS (DART Ionization, *m/z*): Calcd. for C<sub>28</sub>H<sub>41</sub>N<sub>2</sub><sup>+</sup>, ([M+H]<sup>+</sup>): 405.32697; Found: 405.32614.

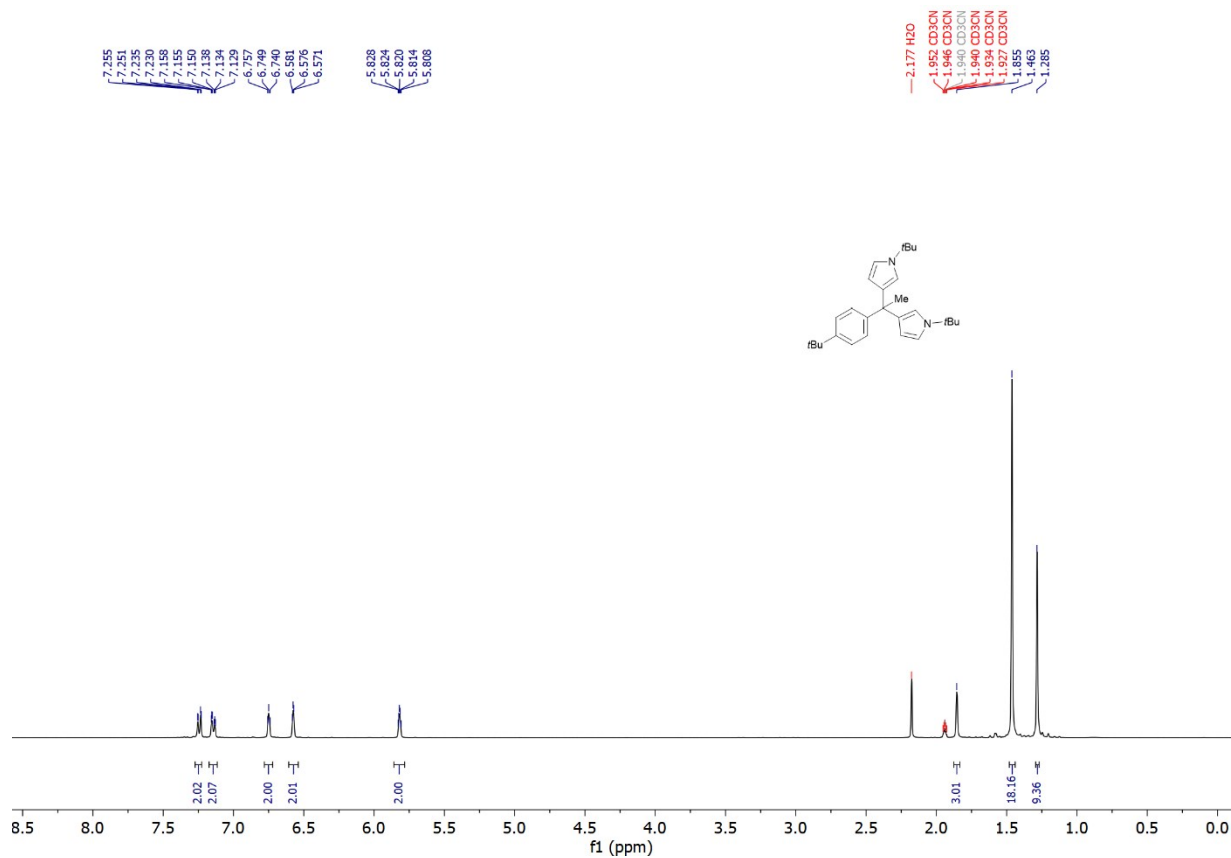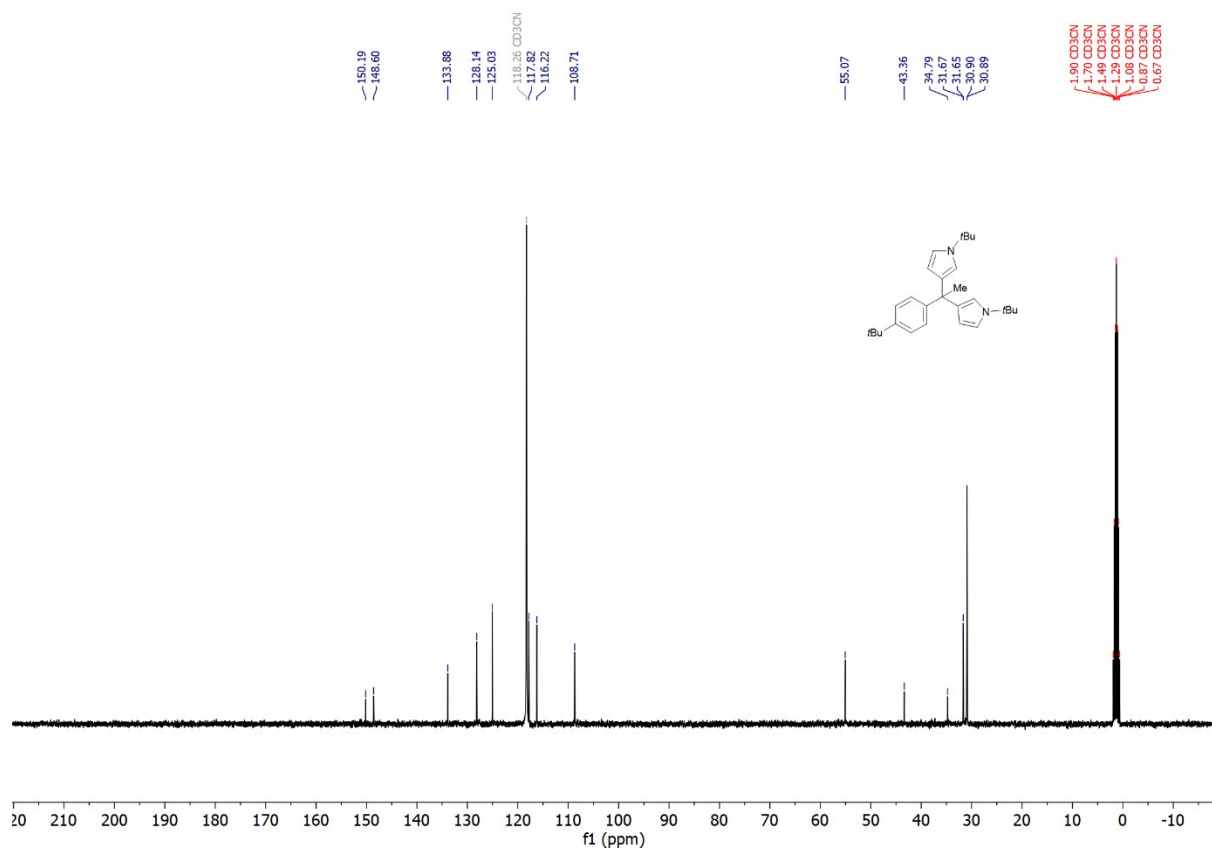



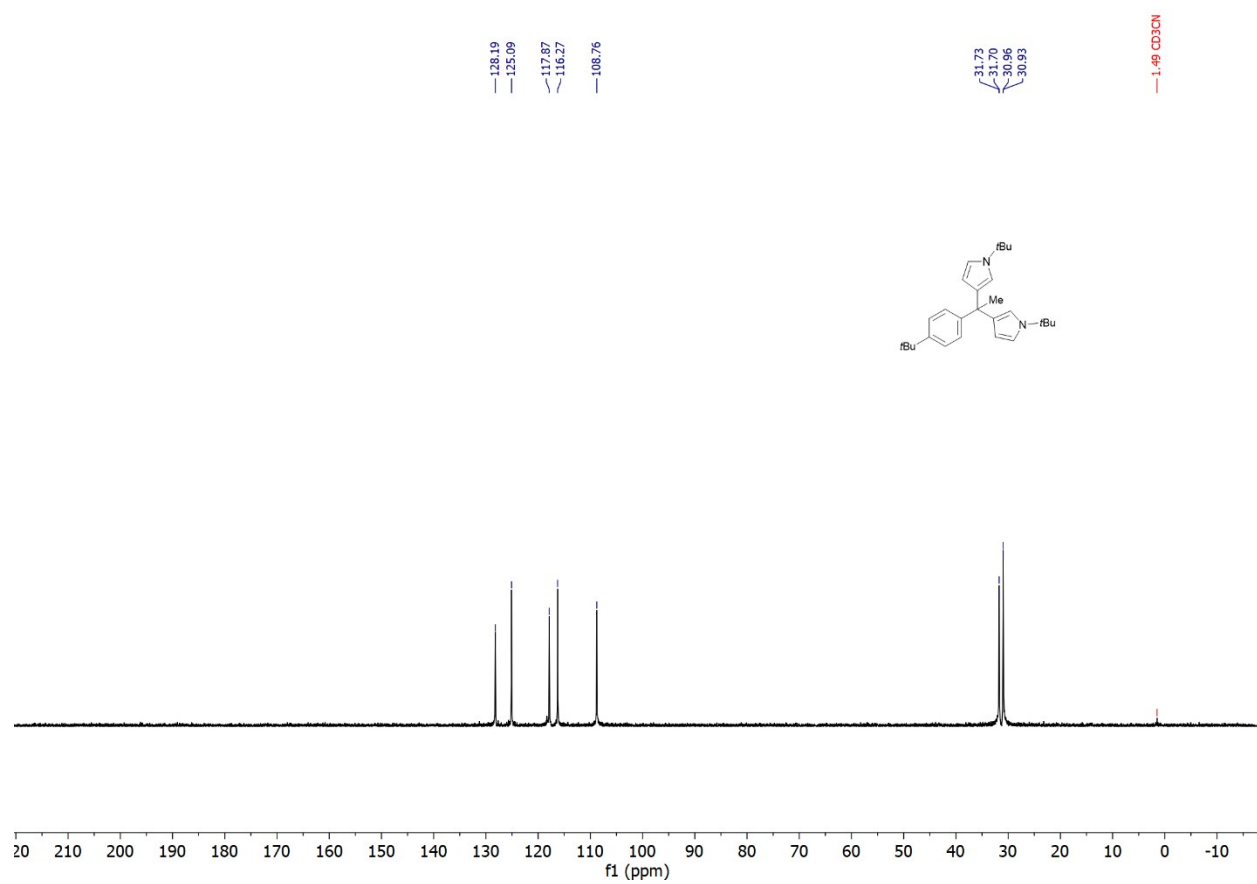

**Preparation of 3,3'-(1-(4-chlorophenyl)ethane-1,1-diyl)bis(1-(*tert*-butyl)-1*H*-pyrrole) (4)**

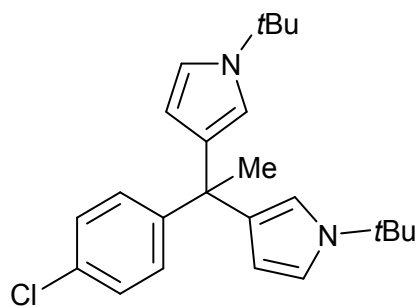

To a solution of 1-chloro-4-ethynylbenzene (13.6 mg, 0.1 mmol) and 1-(*tert*-butyl)-1*H*-pyrrole (30.7 mg, 0.25 mmol) in  $C_6D_6$  (0.3 mL) was added to a solution of  $B(C_6F_5)_3$  (5.1 mg, 0.01 mmol, 10 mol%) in  $C_6D_6$  (0.2 mL). The reaction was complete after 5 hours at room temperature. The residue was purified by flash chromatography (eluent: hexane/ethyl acetate = 8/1) on silica gel to afford the product **4** as a white solid (34.0 mg, 89% yield).

$^1H$  NMR (400 MHz,  $CD_3CN$ ),  $\delta$ : 7.21 – 7.17 (m, 4H), 6.76 (t,  $J$  = 2.8 Hz, 2H), 6.54 (t,  $J$  = 2.4 Hz, 2H), 5.84 – 5.80 (m, 2H), 1.86 (s, 3H), 1.45 (s, 18H).

$^{13}C\{^1H\}$  NMR (100 MHz,  $CD_3CN$ ),  $\delta$ : 152.19, 133.35, 131.20, 130.28, 128.04, 118.05, 116.40, 108.50, 55.16, 43.57, 31.17, 30.86.

DEPT $^{135}$  NMR (100 MHz,  $CD_3CN$ )  $\delta$ : 130.33, 128.09, 118.10, 116.45, 108.55, 31.22, 30.91.

MS (DART Ionization,  $m/z$ ): 383.2 ( $[M+H]^+$ ).

HRMS (DART Ionization,  $m/z$ ): Calcd. for  $C_{24}H_{32}ClN_2^+$ , ( $[M+H]^+$ ): 383.22540; Found: 383.22559.

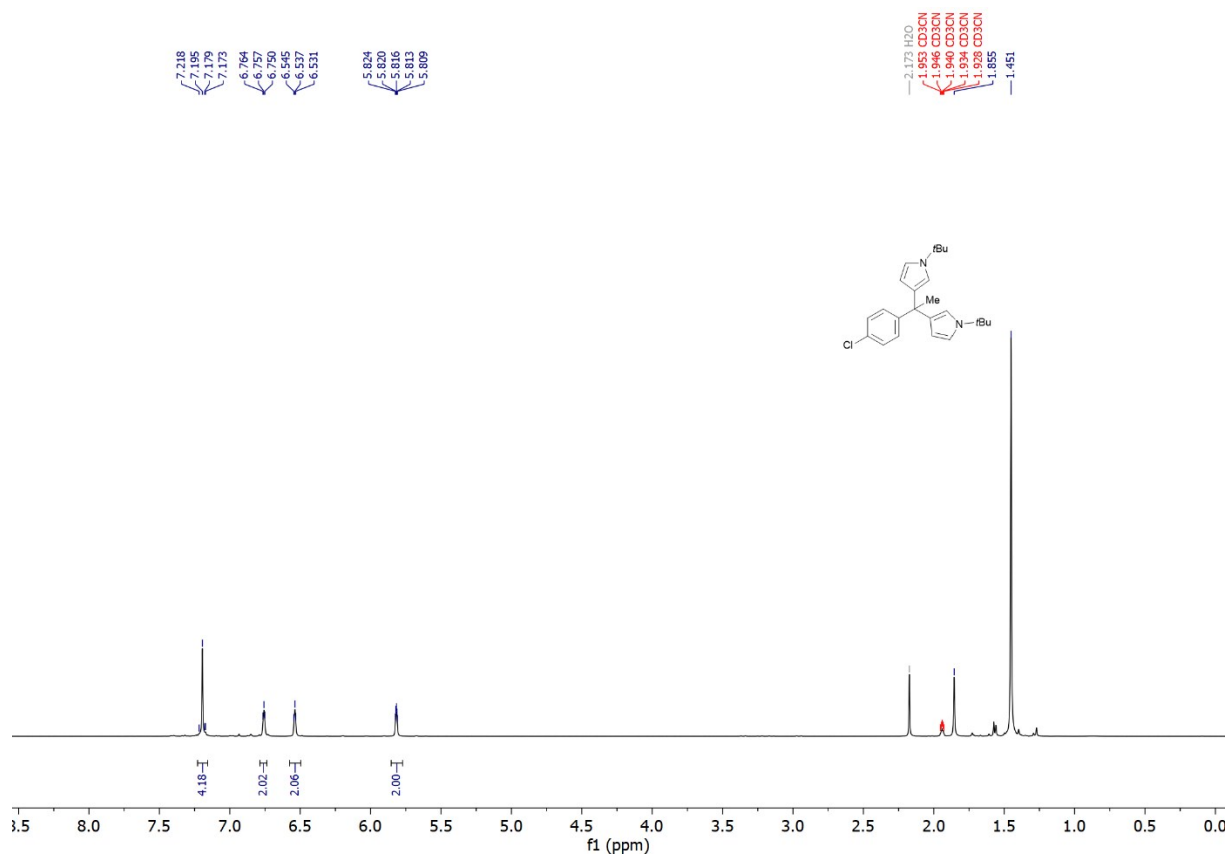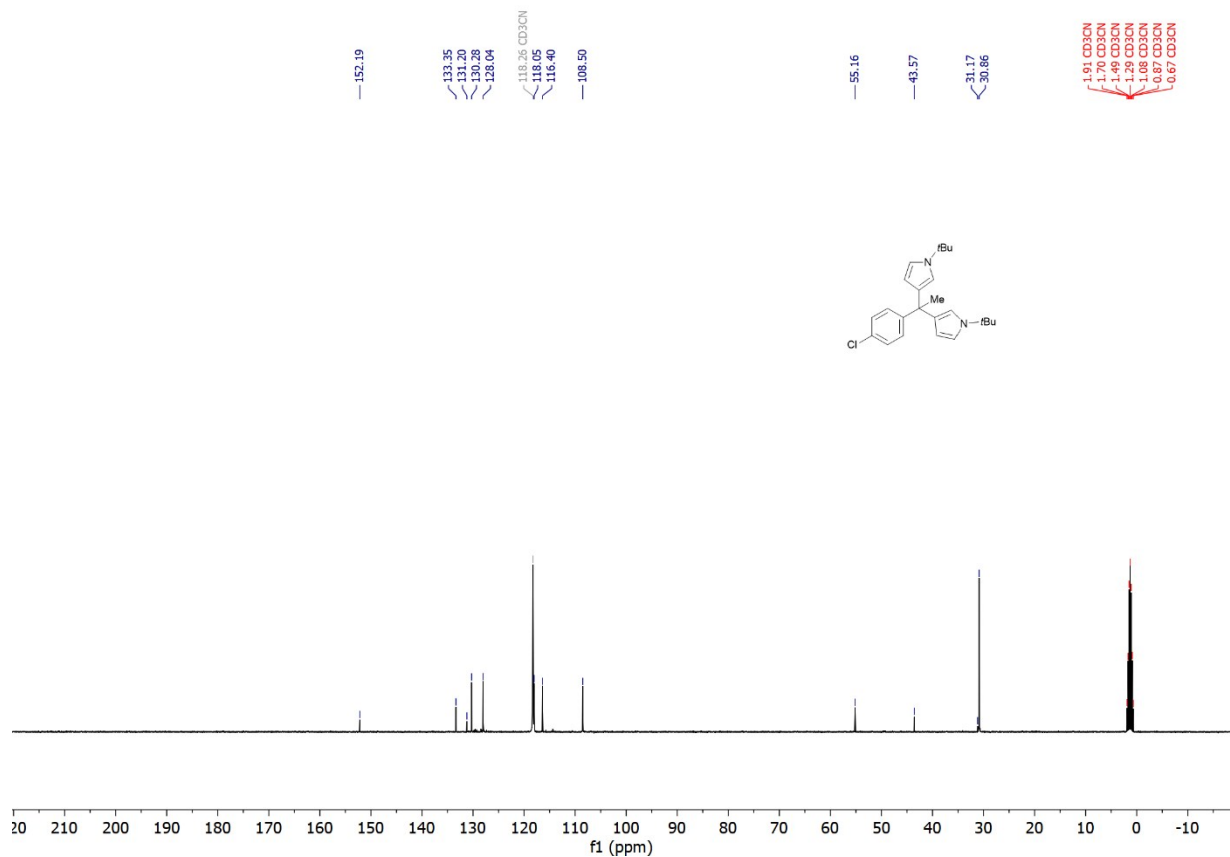

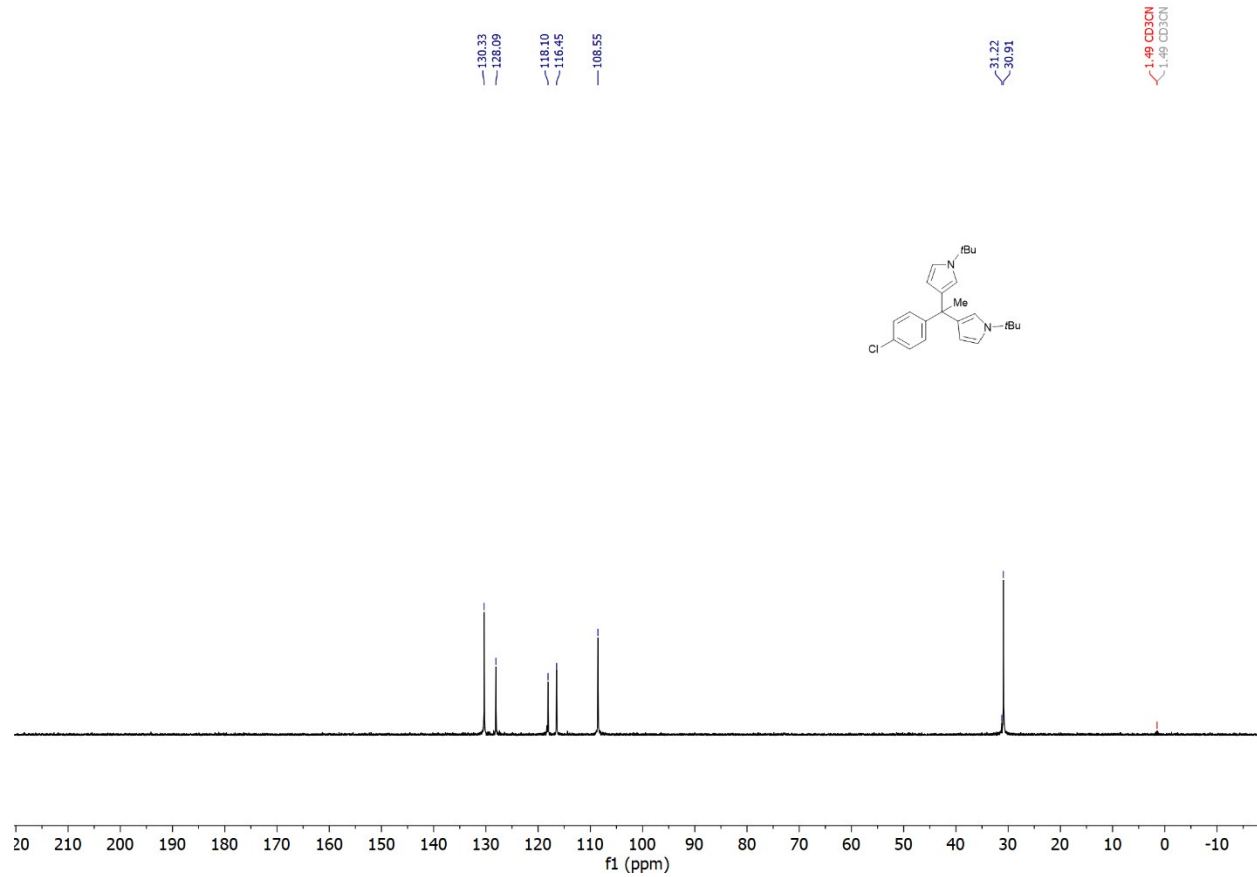

**Preparation of 3,3'-(1-(4-bromophenyl)ethane-1,1-diyl)bis(1-(*tert*-butyl)-1*H*-pyrrole) (5)**

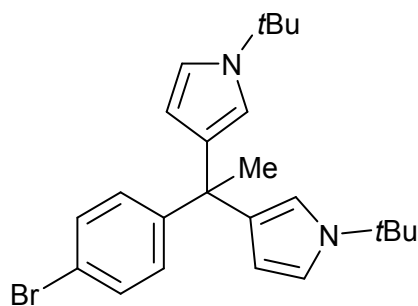

To a solution of 1-bromo-4-ethynylbenzene (18.1 mg, 0.1 mmol) and 1-(*tert*-butyl)-1*H*-pyrrole (30.7 mg, 0.25 mmol) in  $C_6D_6$  (0.3 mL) was added to a solution of  $B(C_6F_5)_3$  (5.1 mg, 0.01 mmol, 10 mol%) in  $C_6D_6$  (0.2 mL). The reaction was complete after 5 hours at room temperature. The residue was purified by flash chromatography (eluent: hexane/ethyl acetate = 8/1) on silica gel to afford the product **5** as a white solid (38.0 mg, 89% yield).

$^1H$  NMR (400 MHz,  $CD_3CN$ ),  $\delta$ : 7.36 – 7.31 (m, 2H), 7.16 – 7.12 (m, 2H), 6.76 (t,  $J$  = 2.4 Hz, 2H), 6.54 (t,  $J$  = 2.0 Hz, 2H), 5.84 – 5.80 (m, 2H), 1.85 (s, 3H), 1.45 (s, 18H).

$^{13}C\{^1H\}$  NMR (100 MHz,  $CD_3CN$ ),  $\delta$ : 152.70, 133.26, 131.04, 130.72, 119.35, 118.05, 116.40, 108.50, 55.16, 43.63, 30.87, 30.80.

DEPT $^{135}$  NMR (100 MHz,  $CD_3CN$ )  $\delta$ : 131.09, 130.78, 118.11, 116.46, 108.55, 30.92, 30.85.

MS (DART Ionization,  $m/z$ ): 427.2 ( $[M+H]^+$ ).

HRMS (DART Ionization,  $m/z$ ): Calcd. for  $C_{24}H_{32}BrN_2^+$ , ( $[M+H]^+$ ): 427.17489; Found: 427.17419.

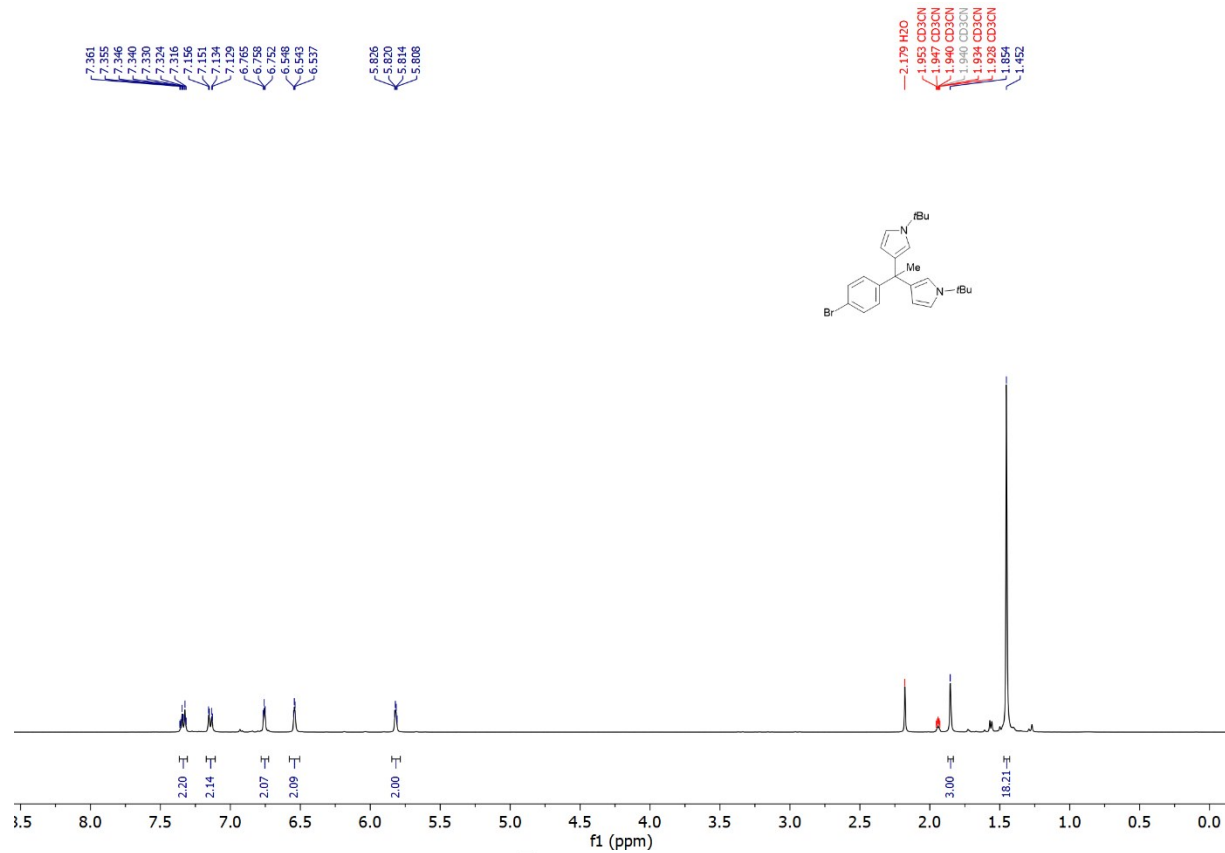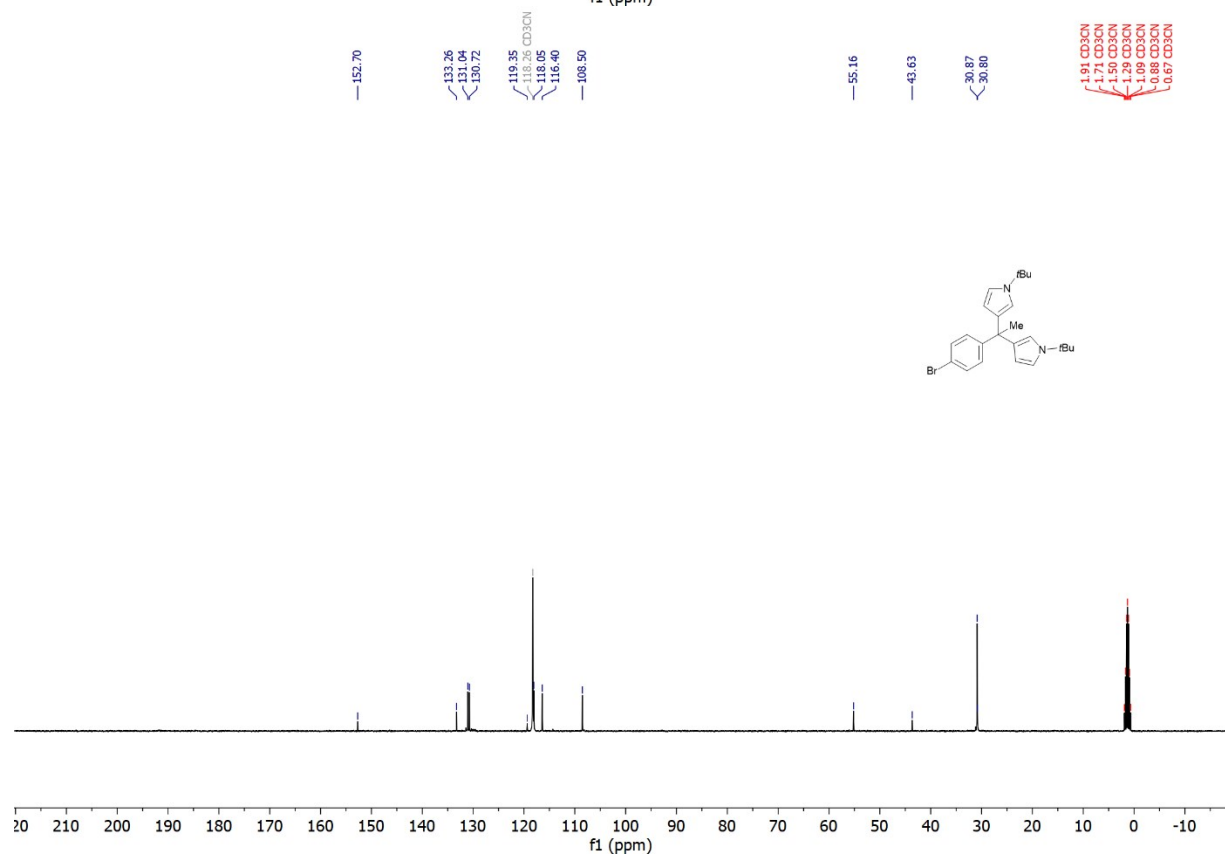

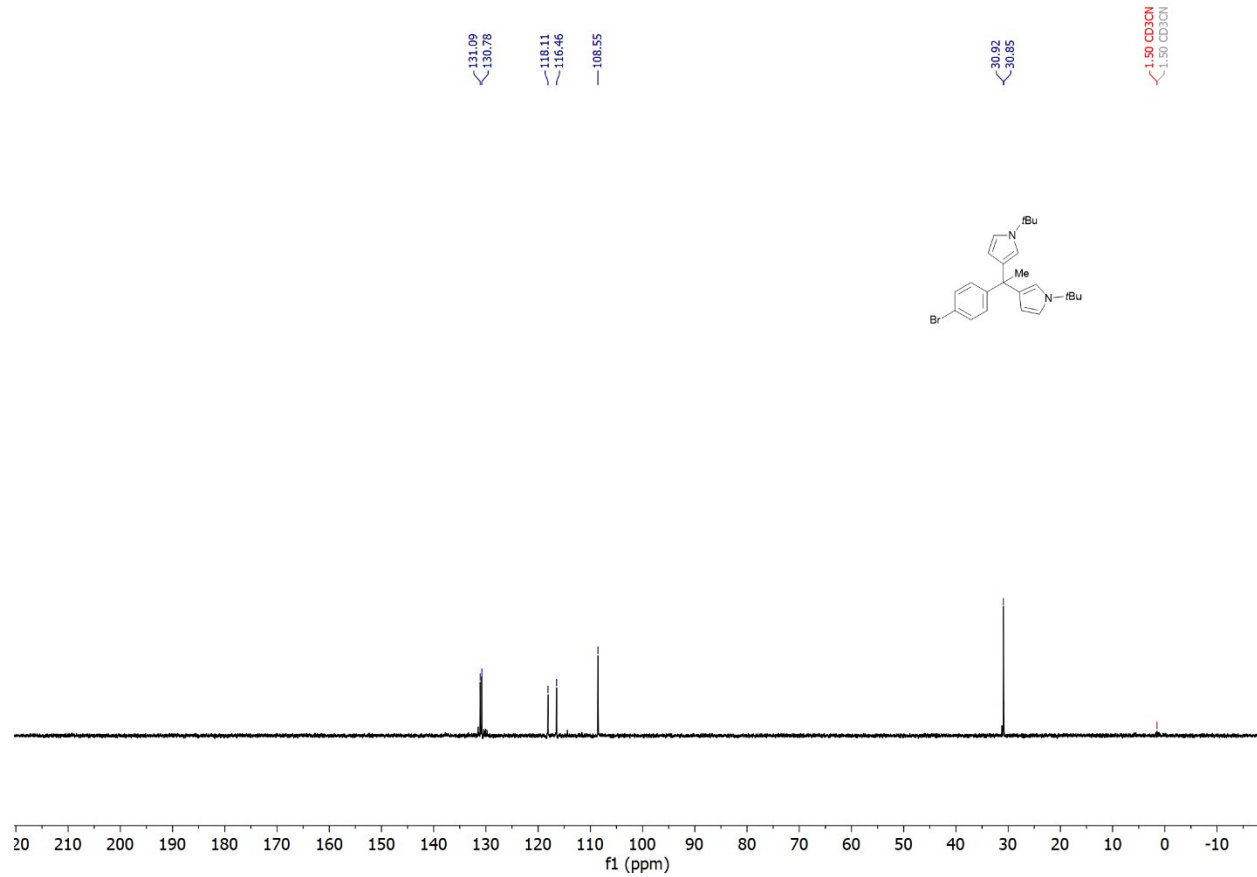

**Preparation of 3,3'-(1-(4-(trifluoromethyl)phenyl)ethane-1,1-diyl)bis(1-(*tert*-butyl)-1*H*-pyrrole) (6)**

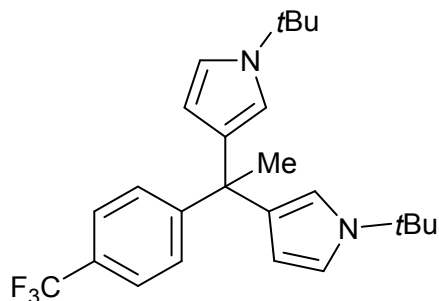

To a solution of 1-trifluoromethyl-4-ethynylbenzene (18.1 mg, 0.1 mmol) and 1-(*tert*-butyl)-1*H*-pyrrole (30.7 mg, 0.25 mmol) in  $C_6D_6$  (0.3 mL) was added to a solution of  $B(C_6F_5)_3$  (5.1 mg, 0.01 mmol, 10 mol%) in  $C_6D_6$  (0.2 mL). The reaction was complete after 6 hours at room temperature. The residue was purified by flash chromatography (eluent: hexane/ethyl acetate = 8/1) on silica gel to afford the product **6** as a white solid (37.0 mg, 89% yield).

$^1H$  NMR (400 MHz,  $CDCl_3$ ),  $\delta$ : 7.51 (d,  $J$  = 8.4 Hz, 2H), 7.39 (d,  $J$  = 8.0 Hz, 2H), 6.77 (t,  $J$  = 2.8 Hz, 2H), 6.57 (t,  $J$  = 2.4 Hz, 2H), 6.45 (dd,  $J$  = 2.8, 2.0 Hz, 2H), 1.89 (s, 3H), 1.46 (s, 18H).

$^{13}C\{^1H\}$  NMR (100 MHz,  $CD_3CN$ ),  $\delta$ : 157.90 (d,  $J$  = 1.1 Hz, 2C), 132.96, 129.09, 128.53, 127.41, 125.04 (dd,  $J$  = 7.8, 4.0 Hz, 1C), 118.15, 116.47, 108.47, 55.21, 44.06, 30.83, 30.66.

DEPT $^{135}$  NMR (100 MHz,  $CD_3CN$ )  $\delta$ : 129.15, 125.11 (dd,  $J$  = 7.8, 4.0 Hz, 1C), 118.21, 116.52, 108.53, 30.88, 30.71.

$^{19}F\{^1H\}$  NMR (377 MHz,  $CD_3CN$ )  $\delta$ : -62.56.

MS (DART Ionization,  $m/z$ ): 417.2 ( $[M+H]^+$ ).

HRMS (DART Ionization,  $m/z$ ): Calcd. for  $C_{25}H_{32}F_3N_2^+$ , ( $[M+H]^+$ ): 417.25176; Found: 417.25110.



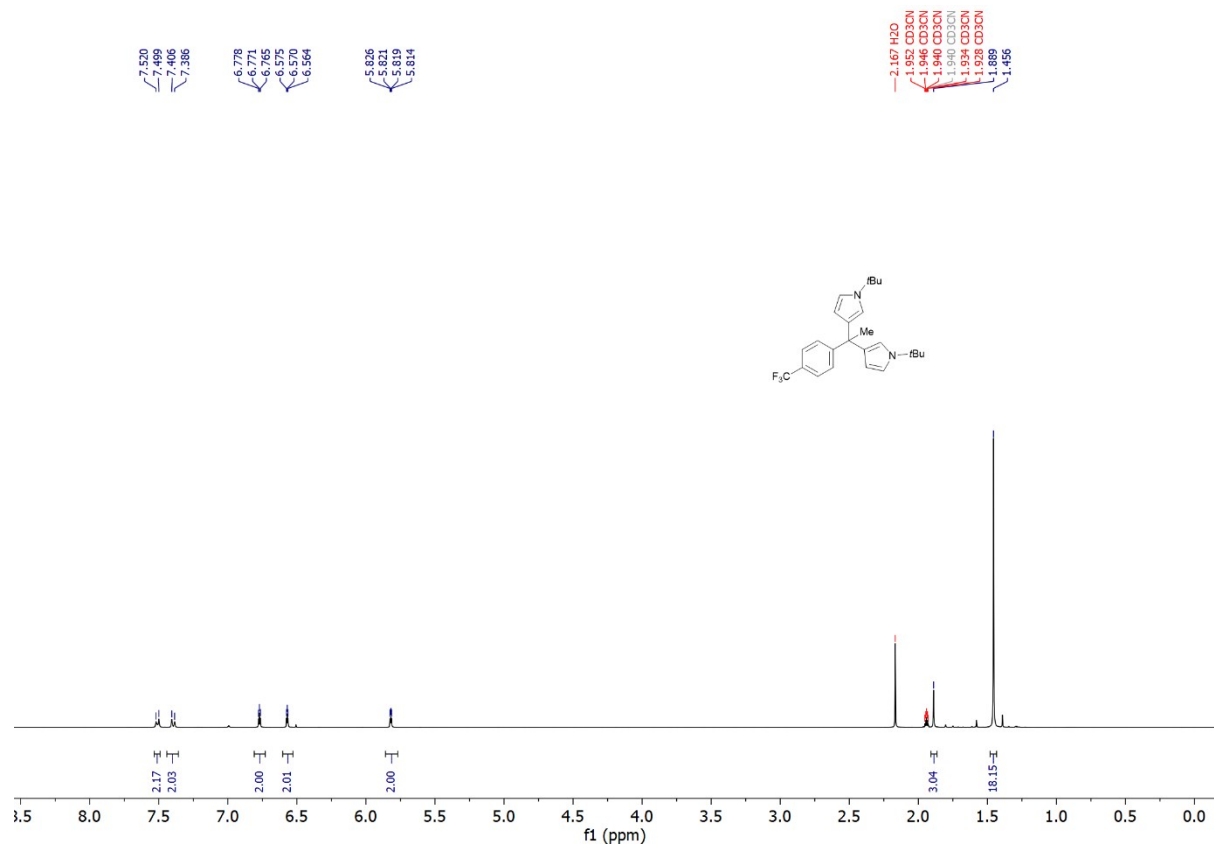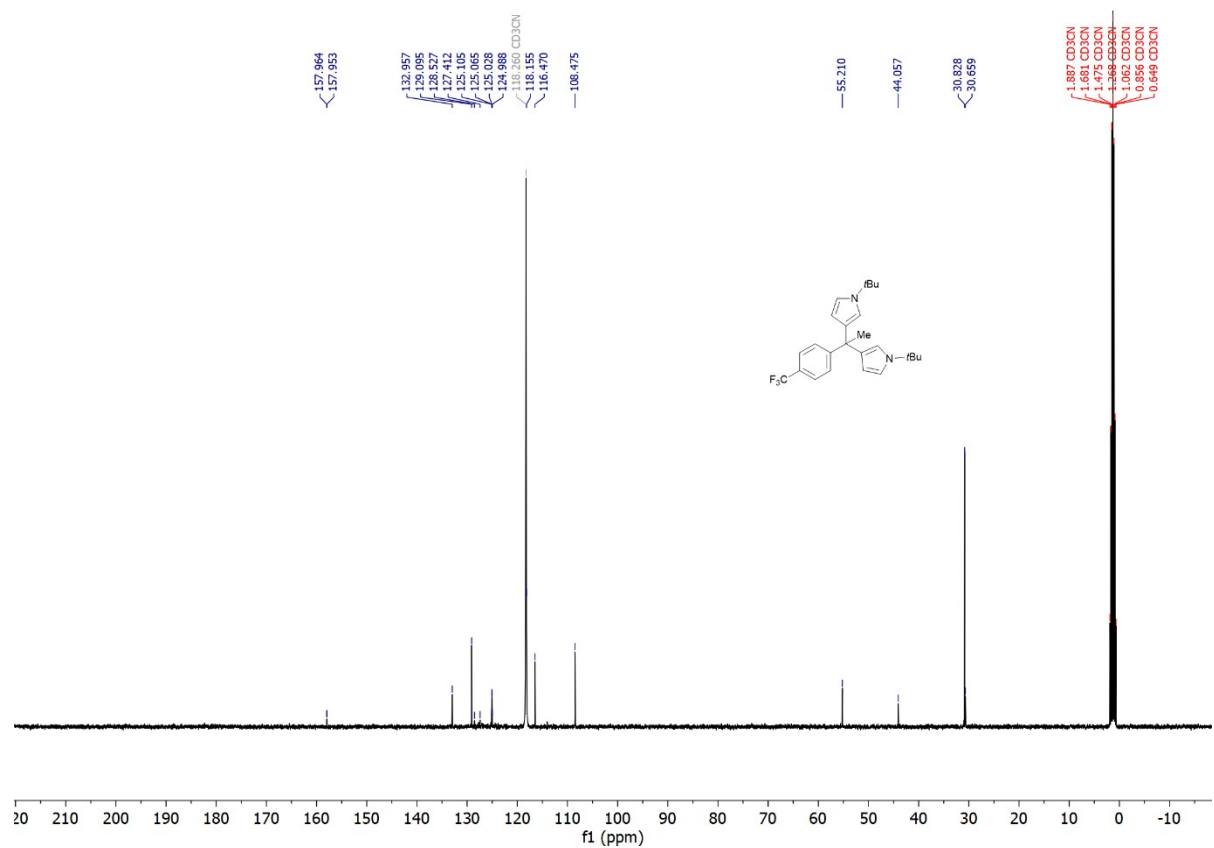

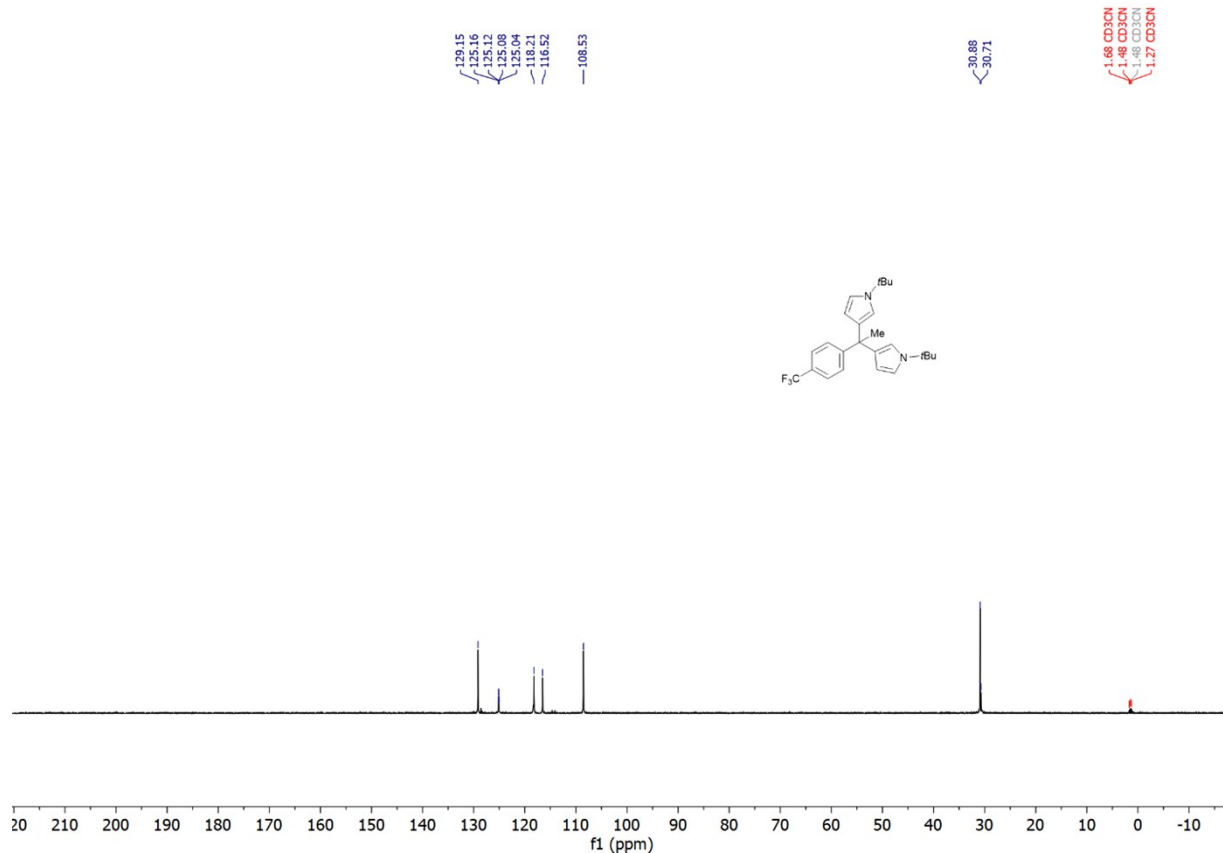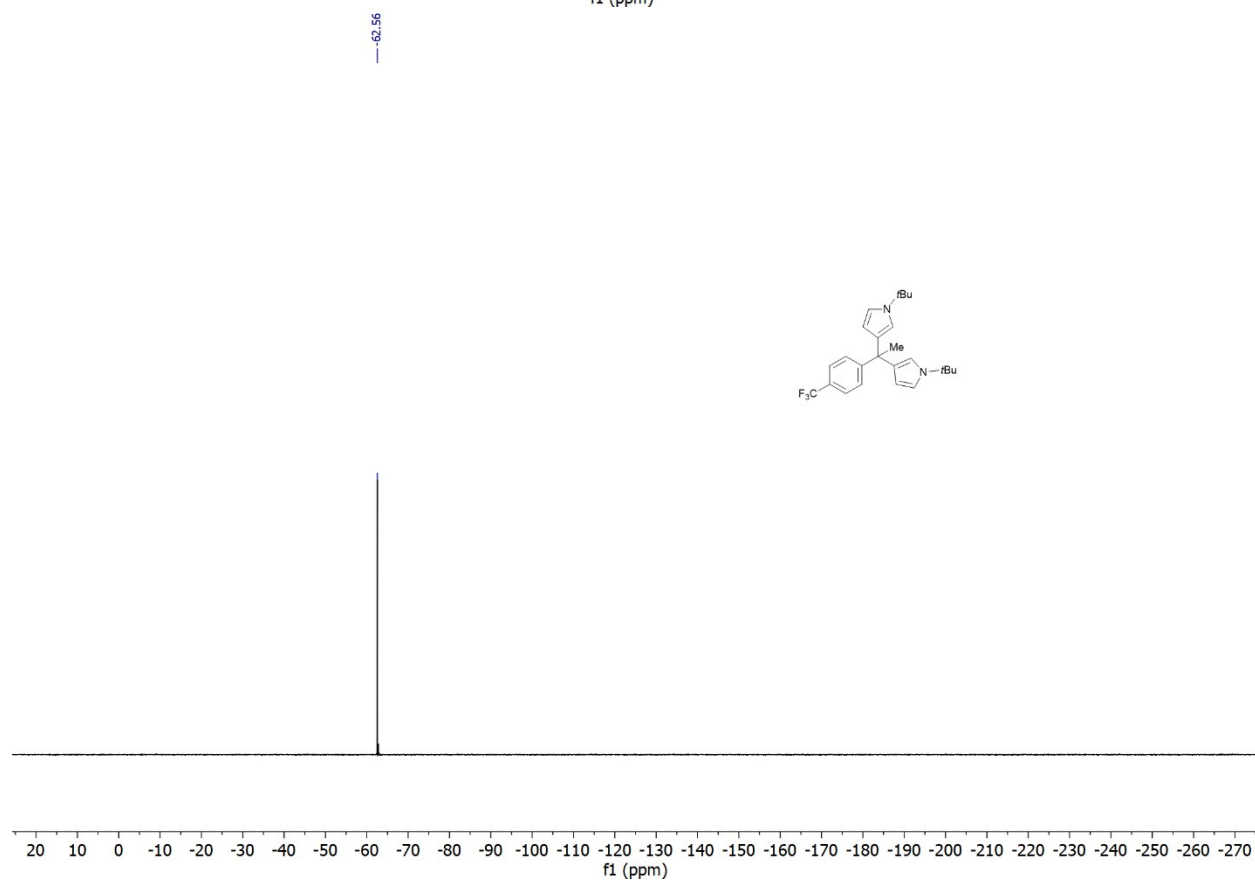

**Preparation of 3,3'-(1-(3-(trifluoromethyl)phenyl)ethane-1,1-diyl)bis(1-(*tert*-butyl)-1*H*-pyrrole) (7)**

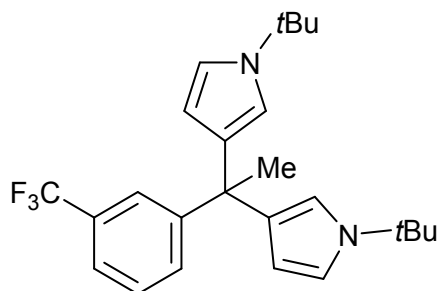

To a solution of 1-trifluoromethyl-3-ethynylbenzene (18.1 mg, 0.1 mmol) and 1-(*tert*-butyl)-1*H*-pyrrole (30.7 mg, 0.25 mmol) in  $C_6D_6$  (0.3 mL) was added to a solution of  $B(C_6F_5)_3$  (5.1 mg, 0.01 mmol, 10 mol%) in  $C_6D_6$  (0.2 mL). The reaction was complete after 6 hours at room temperature. The residue was purified by flash chromatography (eluent: hexane/ethyl acetate = 8/1) on silica gel to afford the product **7** as a white solid (39.5 mg, 95% yield).

$^1H$  NMR (400 MHz,  $CD_3CN$ ),  $\delta$ : 7.52 – 7.49 (m, 2H), 7.47 – 7.44 (m, 1H), 7.41 – 7.37 (m, 1H), 6.79 (dd,  $J$  = 2.8, 2.4 Hz, 2H), 6.58 (dd,  $J$  = 2.4, 1.6 Hz, 2H), 5.83 (dd,  $J$  = 2.8, 1.6 Hz, 2H), 1.91 (s, 3H), 1.47 (s, 18H).

$^{13}C\{^1H\}$  NMR (100 MHz,  $CD_3CN$ ),  $\delta$ : 154.67, 133.03, 132.52, 132.50, 129.55, 128.99, 124.95 (dd,  $J$  = 8.0, 4.0 Hz, 1C), 122.88 (dd,  $J$  = 8.0, 4.0 Hz, 1C), 118.19, 116.54, 108.45, 55.23, 44.03, 30.84, 30.75.

$^{19}F\{^1H\}$  NMR (377 MHz,  $CD_3CN$ )  $\delta$ : -62.87.

MS (DART Ionization,  $m/z$ ): 417.2 ( $[M+H]^+$ ).

HRMS (DART Ionization,  $m/z$ ): Calcd. for  $C_{25}H_{32}F_3N_2^+$ , ( $[M+H]^+$ ): 417.25176; Found: 417.25245.

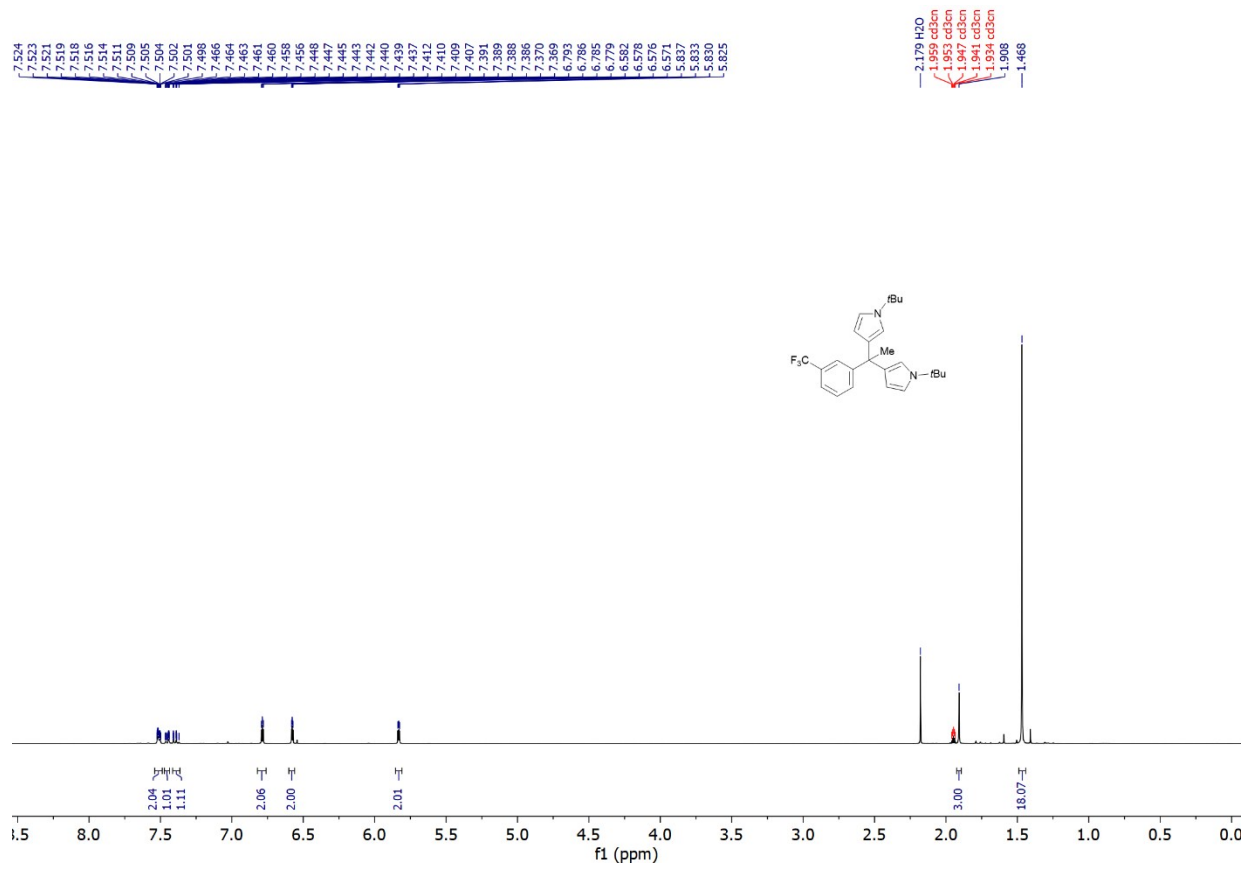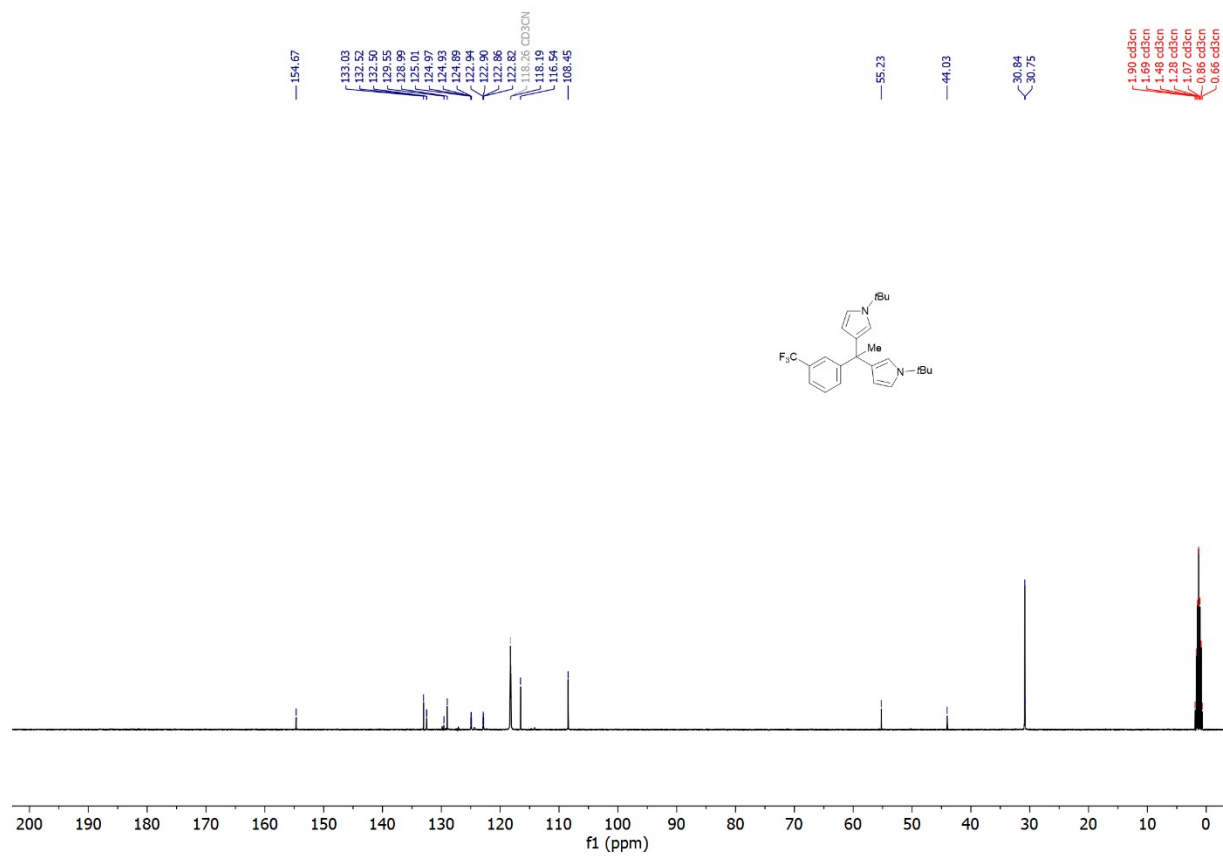

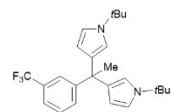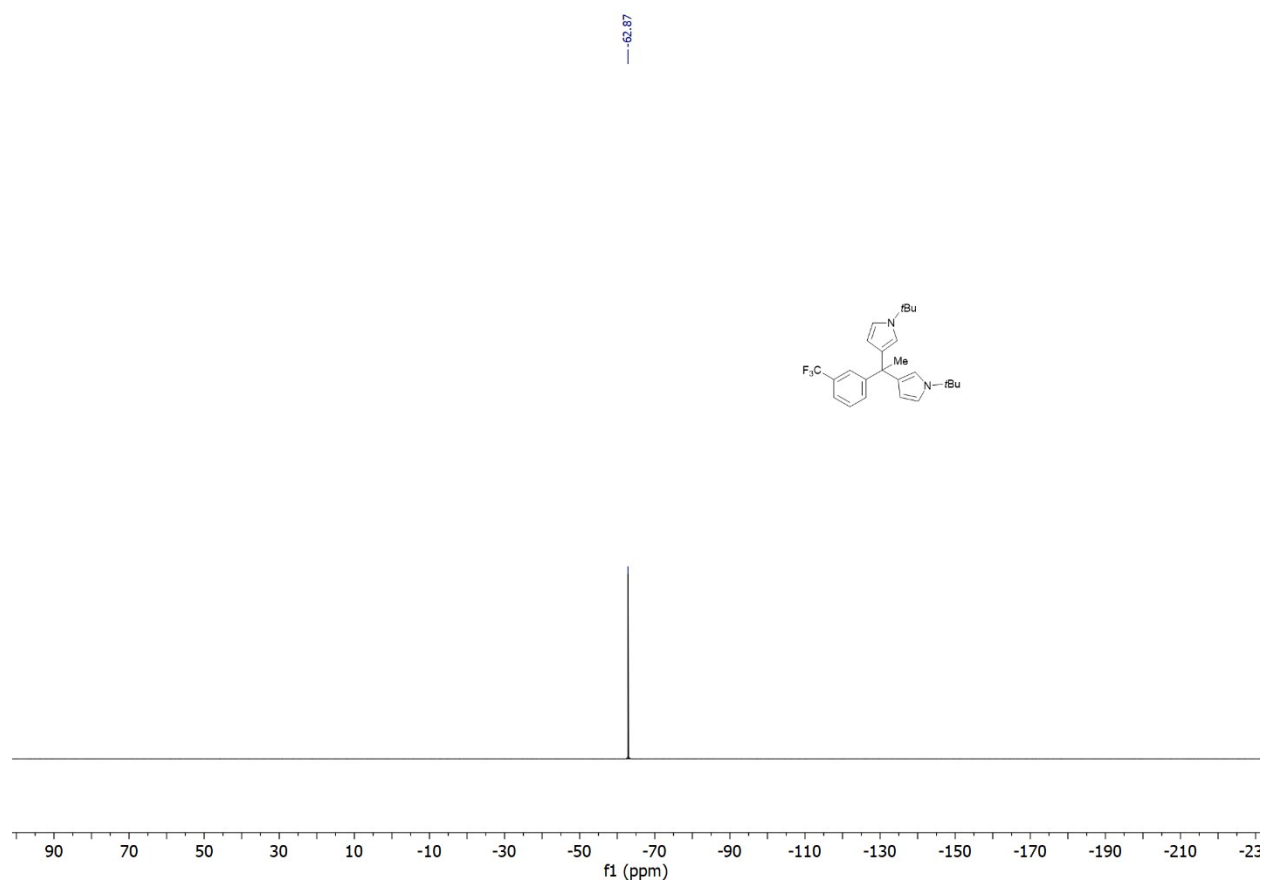

**Preparation of 3,3'-(1-(3-(trifluoromethyl)phenyl)ethane-1,1-diyl)bis(1-(*tert*-butyl)-1*H*-pyrrole) (8)**

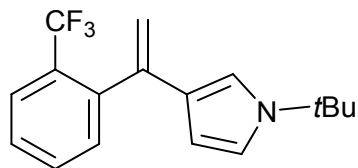

To a solution of 1-trifluoromethyl-2-ethynylbenzene (18.1 mg, 0.1 mmol) and 1-(*tert*-butyl)-1*H*-pyrrole (30.7 mg, 0.25 mmol) in C<sub>6</sub>D<sub>6</sub> (0.3 mL) was added to a solution of B(C<sub>6</sub>F<sub>5</sub>)<sub>3</sub> (5.1 mg, 0.01 mmol, 10 mol%) in C<sub>6</sub>D<sub>6</sub> (0.2 mL). The reaction was complete after 12 hours at room temperature. The residue was purified by flash chromatography (eluent: hexane/diethyl ether = 20/1) on silica gel to afford the product **8** as a colorless oil (19.0 mg, 64% yield).

<sup>1</sup>H NMR (400 MHz, CDCl<sub>3</sub>), δ: 7.74 (d, *J* = 8.0 Hz, 1H), 7.59 (t, *J* = 7.6 Hz, 1H), 7.50 (t, *J* = 7.6 Hz, 1H), 7.33 (d, *J* = 7.6 Hz, 1H), 6.82 (t, *J* = 2.8 Hz, 2H), 6.41 (t, *J* = 2.0 Hz, 2H), 6.16 (dd, *J* = 2.8, 2.0 Hz, 2H), 5.56 (d, *J* = 1.2 Hz, 1H), 4.73 (s, 1H), 1.40 (s, 9H).

<sup>13</sup>C{<sup>1</sup>H} NMR (100 MHz, CD<sub>3</sub>CN), δ: 142.67, 142.44, 132.56, 132.53, 128.35, 126.95, 126.90, 125.80, 119.64, 118.02, 109.61, 106.24, 55.71, 30.64.

DEPT<sup>135</sup> NMR (100 MHz, CD<sub>3</sub>CN) δ: 132.55, 132.53, 128.35, 126.95, 126.90, 119.64, 118.02, 106.24, 30.64.

<sup>19</sup>F{<sup>1</sup>H} NMR (377 MHz, CD<sub>3</sub>CN) δ: -58.08.

MS (DART Ionization, *m/z*): 294.1 ([M+H]<sup>+</sup>).

HRMS (DART Ionization, *m/z*): Calcd. for C<sub>17</sub>H<sub>19</sub>F<sub>3</sub>N<sup>+</sup>, ([M+H]<sup>+</sup>): 294.14696; Found: 294.14693.

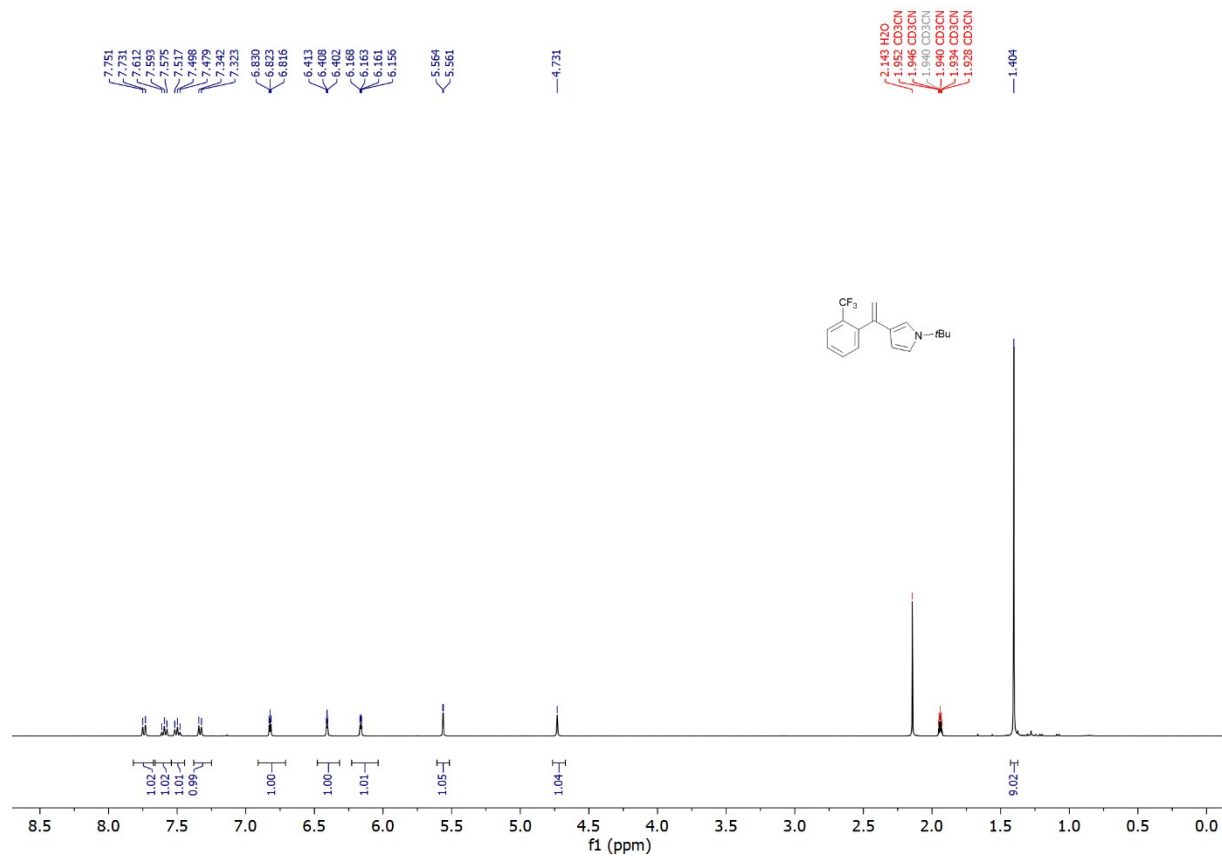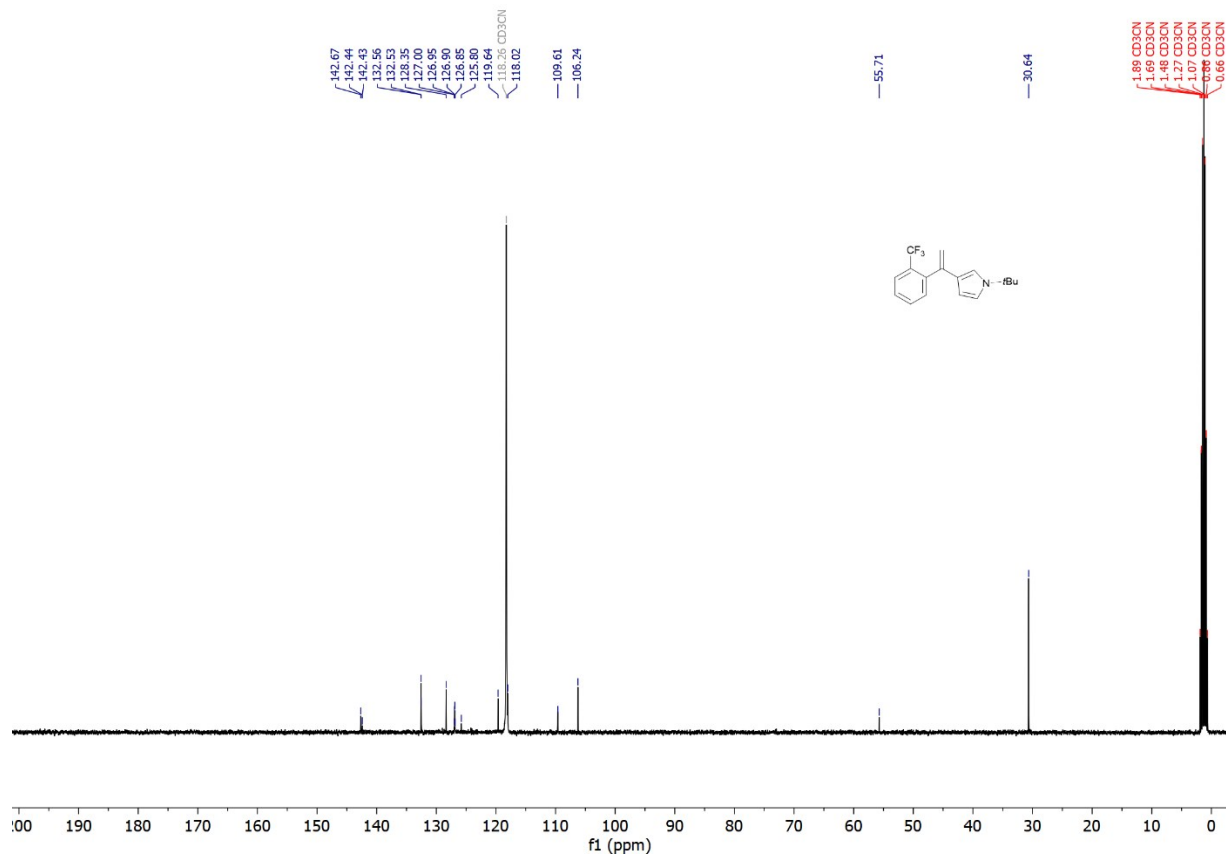

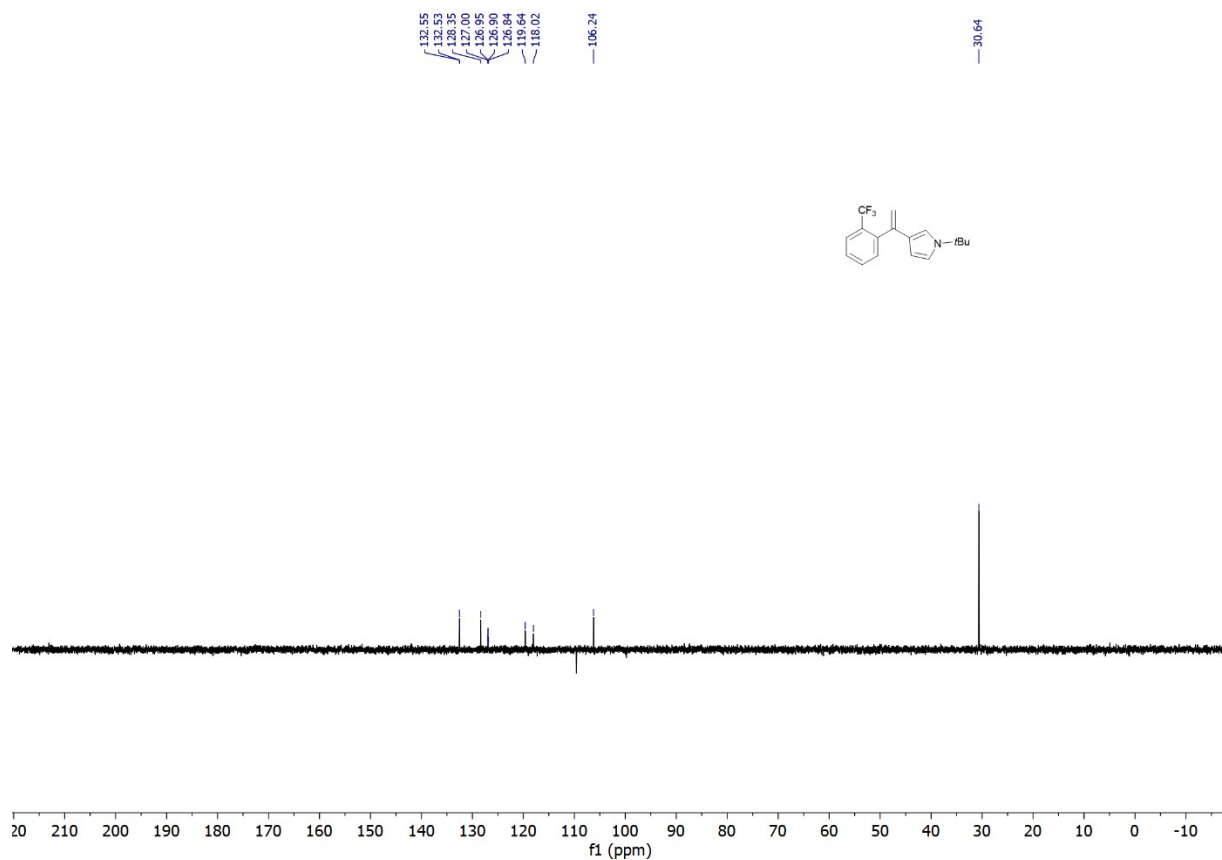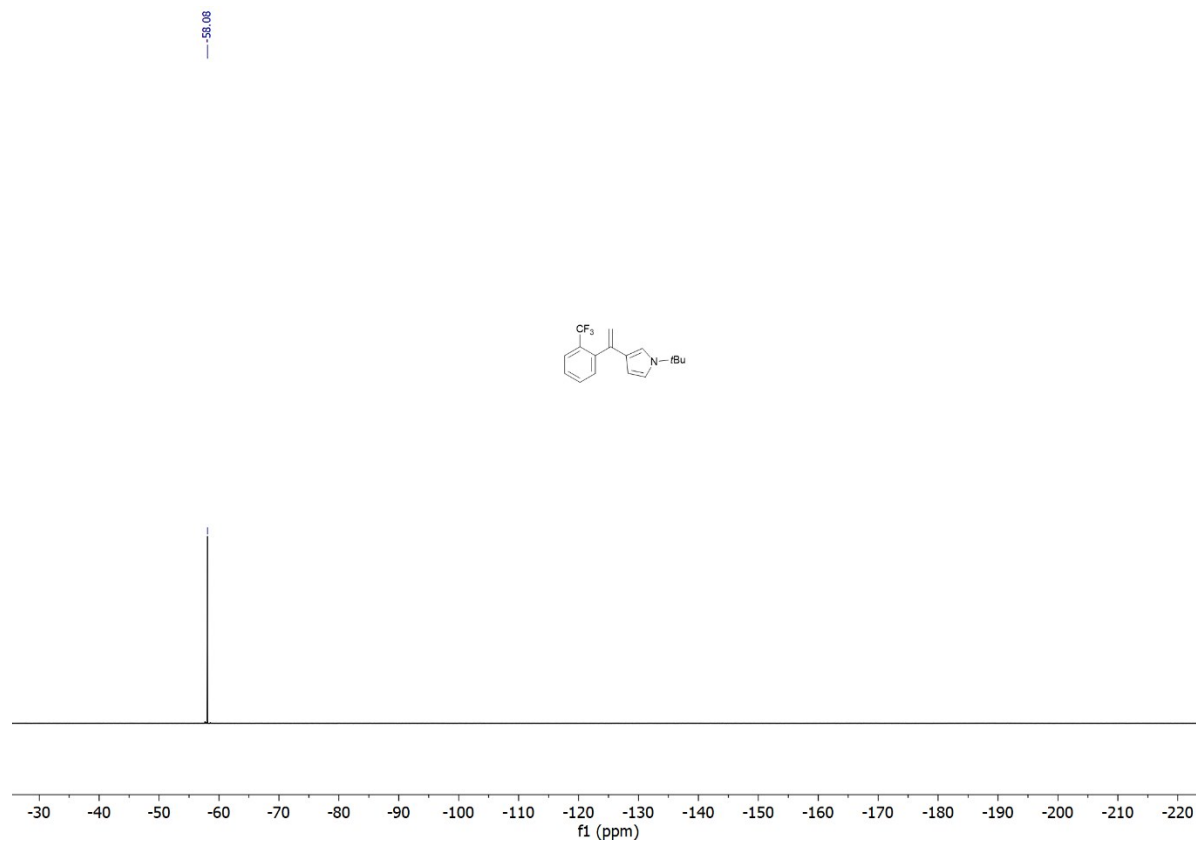



**Preparation of 3,3'-(1-(2,4-difluorophenyl)ethane-1,1-diyl)bis(1-(*tert*-butyl)-1*H*-pyrrole) (9)**

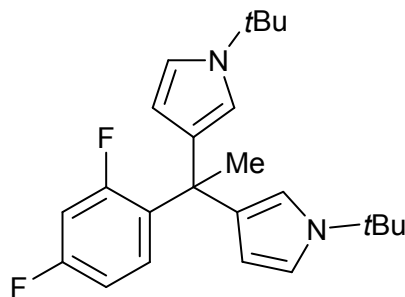

To a solution of 1-ethynyl-2,4-difluorobenzene (13.8 mg, 0.1 mmol) and 1-(*tert*-butyl)-1*H*-pyrrole (30.7 mg, 0.25 mmol) in  $C_6D_6$  (0.3 mL) was added to a solution of  $B(C_6F_5)_3$  (5.1 mg, 0.01 mmol, 10 mol%) in  $C_6D_6$  (0.2 mL). The reaction was complete after 5 hours at room temperature. The residue was purified by flash chromatography (eluent: hexane/ethyl acetate = 8/1) on silica gel to afford the product **9** as a white solid (30.8 mg, 80% yield).

$^1H$  NMR (400 MHz,  $CD_3CN$ ),  $\delta$ : 7.04 – 6.97 (m, 1H), 6.82 – 6.73 (m, 4H), 6.48 (t,  $J$  = 2.0 Hz, 2H), 5.79 (dd,  $J$  = 3.2, 2.0 Hz, 2H), 1.94 (s, 3H), 1.45 (s, 18H).

$^{13}C\{^1H\}$  NMR (100 MHz,  $CD_3CN$ ),  $\delta$ : 163.52, 163.40, 163.36, 163.25, 161.09, 160.97, 160.88, 160.76, 135.83, 135.79, 135.71, 135.68, 132.67, 132.04, 131.98, 131.95, 131.89, 117.88, 116.07, 110.44, 110.40, 110.24, 110.20, 108.14, 104.97, 104.72, 104.70, 104.45, 55.16, 42.27, 42.25, 30.83, 28.57, 28.53.

DEPT $^{135}$  NMR (100 MHz,  $CD_3CN$ )  $\delta$ : 132.10, 132.04, 132.01, 131.95, 117.94, 116.13, 110.50, 110.46, 110.30, 110.26, 108.20, 105.03, 104.78, 104.76, 104.50, 30.88, 28.62, 28.58.

$^{19}F\{^1H\}$  NMR (377 MHz,  $CD_3CN$ )  $\delta$ : -103.39 (m, 1F), -116.57 (m, 1F).

HRMS (DART Ionization,  $m/z$ ): Calcd. for  $C_{24}H_{31}F_2N_2^+$ , ( $[M+H]^+$ ): 385.24553; Found: 385.24577.

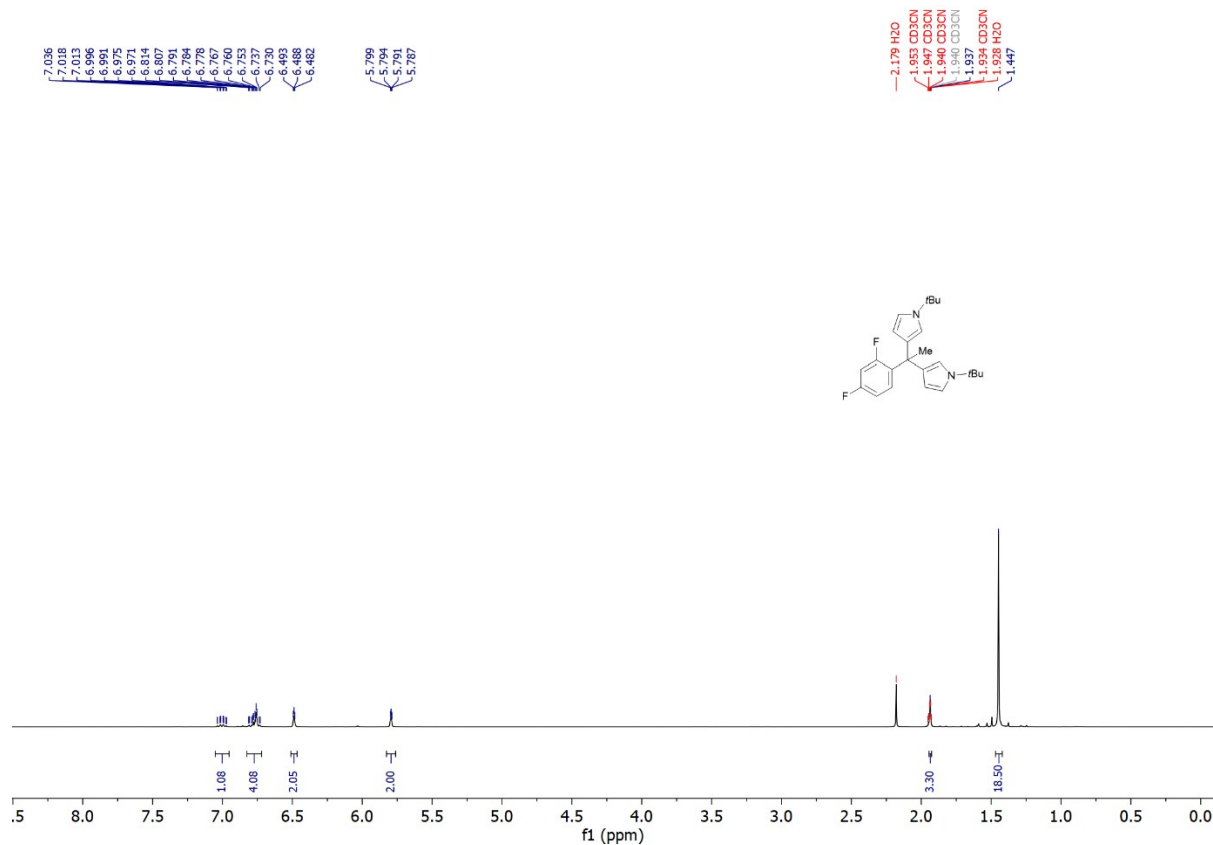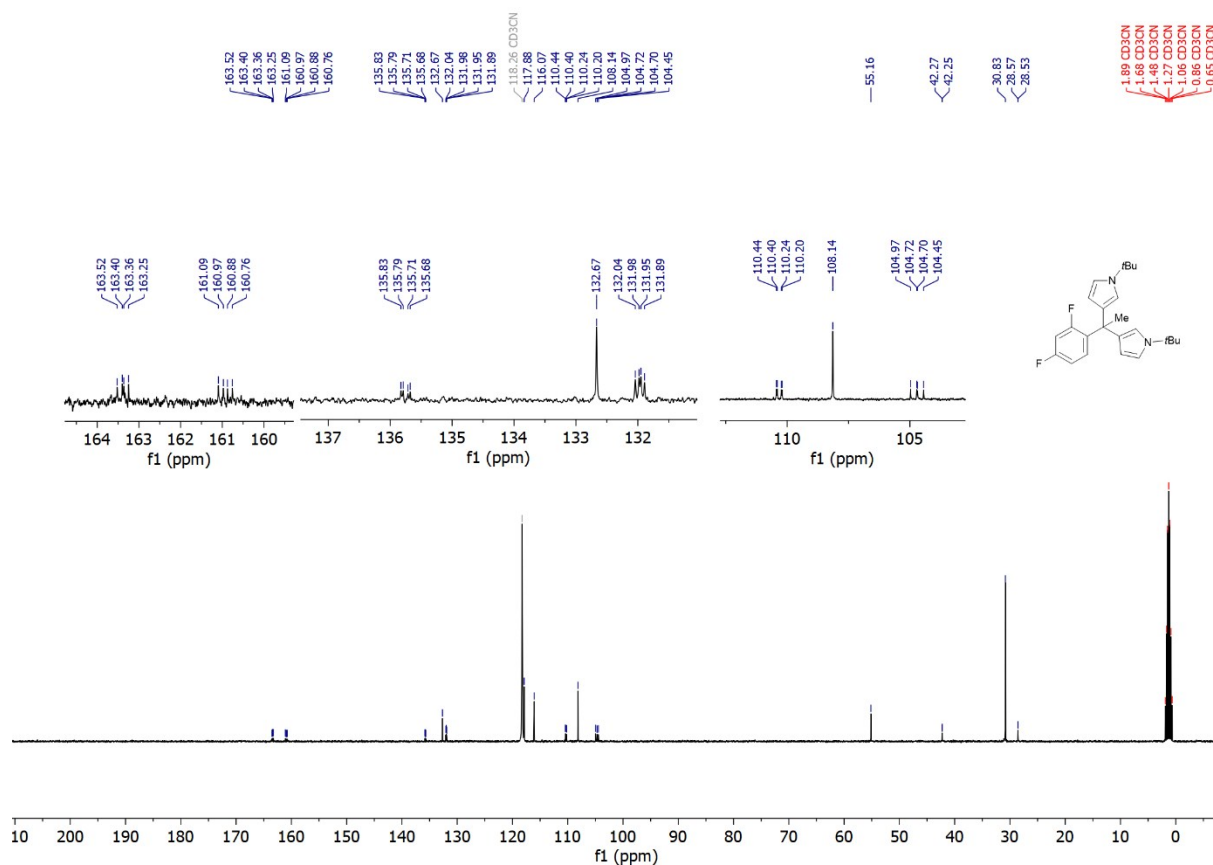

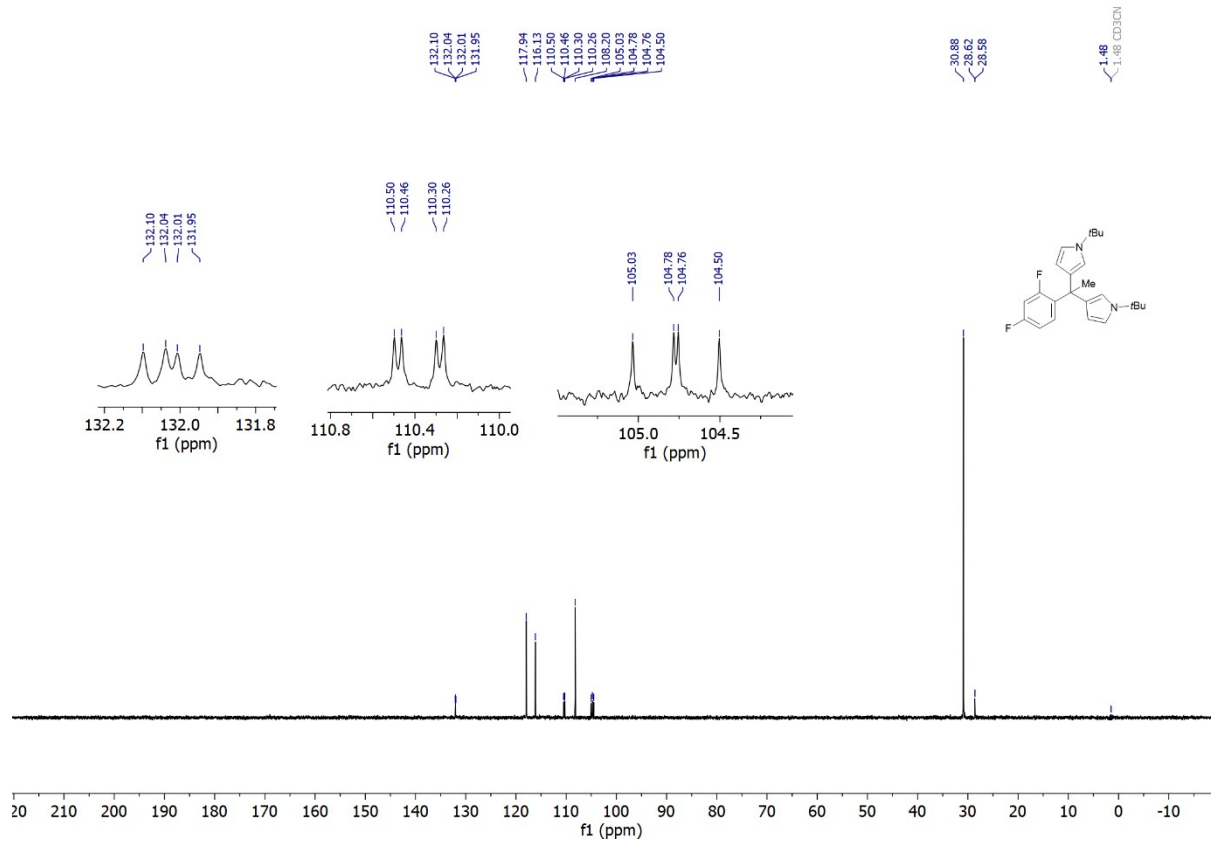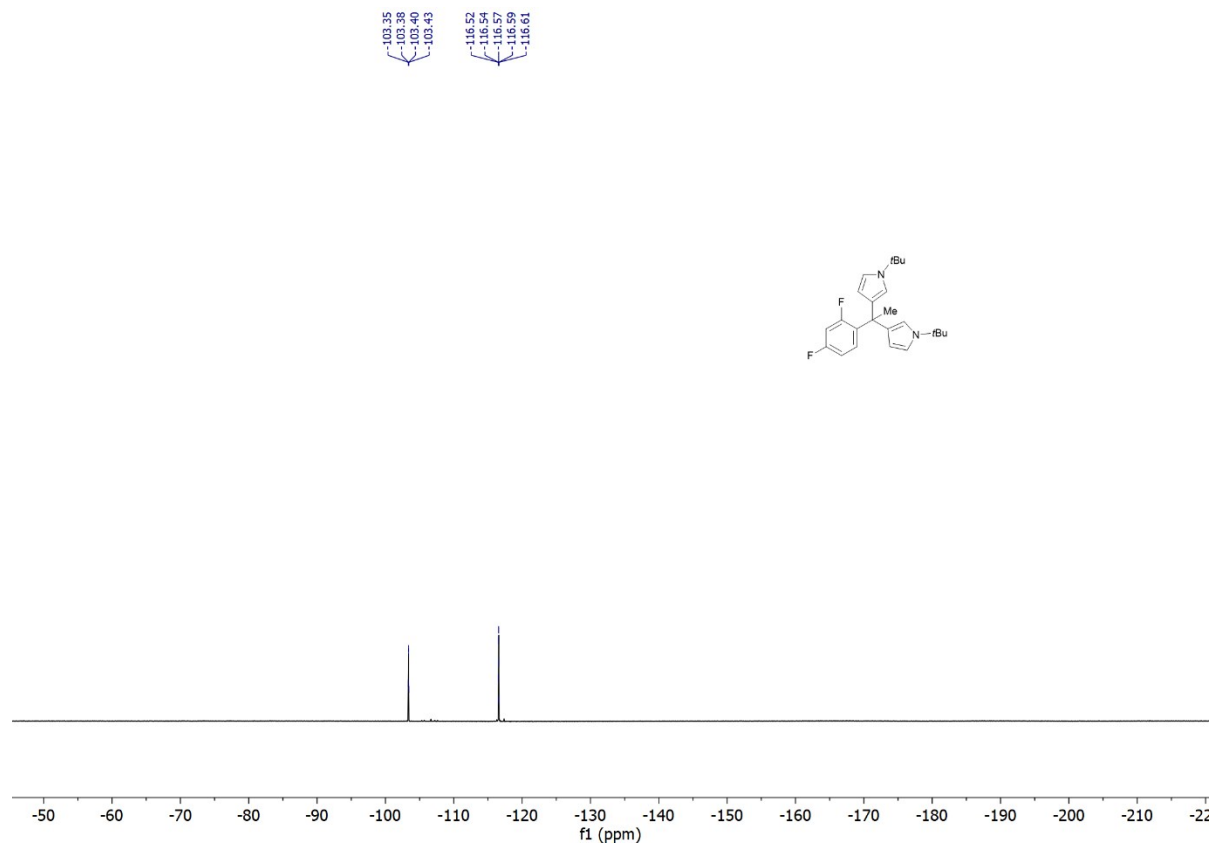

### Preparation of 3,3'-(decane-2,2-diyl)bis(1-(*tert*-butyl)-1*H*-pyrrole) (**10**)

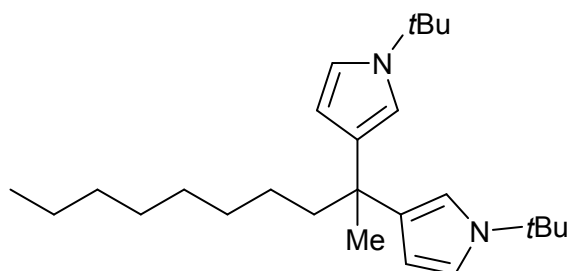

Condition A: To a solution of 1-decyne (13.8 mg, 0.1 mmol) and 1-(*tert*-butyl)-1*H*-pyrrole (30.7 mg, 0.25 mmol) in C<sub>6</sub>D<sub>6</sub> (0.3 mL) was added to a solution of B(C<sub>6</sub>F<sub>5</sub>)<sub>3</sub> (5.1 mg, 0.01 mmol, 10 mol%) in C<sub>6</sub>D<sub>6</sub> (0.2 mL). The reaction was complete after 12 hours at room temperature. The residue was purified by flash chromatography (eluent: hexane/ethyl acetate = 12/1) on silica gel to afford the product **10** as a colourless oil (13.1 mg, 34% yield).

Condition B: To a solution of 1-decyne (13.8 mg, 0.1 mmol) and 1-(*tert*-butyl)-1*H*-pyrrole (30.7 mg, 0.25 mmol) in C<sub>6</sub>D<sub>6</sub> (0.3 mL) was added to a solution of B(C<sub>6</sub>F<sub>5</sub>)<sub>3</sub> (5.1 mg, 0.01 mmol, 10 mol%) in C<sub>6</sub>D<sub>6</sub> (0.2 mL). The reaction was complete after 24 hours at 50 °C. The residue was purified by flash chromatography (eluent: hexane/ethyl acetate = 12/1) on silica gel to afford the product **10** as a colourless oil (20.0 mg, 52% yield).

<sup>1</sup>H NMR (500 MHz, CD<sub>3</sub>CN), δ: 6.70 (t, *J* = 2.0 Hz, 2H), 6.60 (t, *J* = 2.0 Hz, 2H), 5.92 (dd, *J* = 2.4, 1.2 Hz, 2H), 1.83 – 1.79 (m, 2H), 1.47 (s, 18H), 1.46 (s, 3H), 1.32 – 1.26 (m, 12H), 0.89 (t, *J* = 5.6 Hz, 3H).

<sup>13</sup>C{<sup>1</sup>H} NMR (126 MHz, CD<sub>3</sub>CN) δ: 134.59, 117.46, 114.86, 107.28, 54.94, 44.71, 37.97, 32.59, 31.09, 30.87, 30.32, 30.04, 27.63, 25.71, 23.36, 14.35.

DEPT<sup>135</sup> NMR (100 MHz, CD<sub>3</sub>CN) δ: 117.48, 114.86, 107.28, 44.71, 32.60, 31.10, 30.88, 30.34, 30.05, 27.62, 25.72, 23.37, 14.37.

MS (DART Ionization, *m/z*): 385.4 ([M+H]<sup>+</sup>).

HRMS (DART Ionization, *m/z*): Calcd. for C<sub>26</sub>H<sub>45</sub>N<sub>2</sub><sup>+</sup>, ([M+H]<sup>+</sup>): 385.35827; Found: 385.35772.

2.183 H2O  
1.973 cd3cn  
1.968 cd3cn  
1.963 cd3cn  
1.958 cd3cn  
1.953 cd3cn  
1.831  
1.821  
1.815  
1.813  
1.807  
1.799  
1.467  
1.459  
1.312  
1.309  
1.307  
1.299  
1.296  
1.287  
1.263  
-0.906  
-0.893  
-0.878

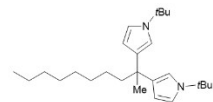

—134.59 —117.46 —114.86 —107.28 —54.94 —44.71 —37.97 —32.69 —31.69 —30.87 —30.32 —30.04 —30.04 —27.63 —25.71 —23.36 —14.35 —1.77 cd3cn —1.61 cd3cn —1.27 cd3cn —1.11 cd3cn —0.94 cd3cn —0.78 cd3cn

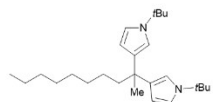

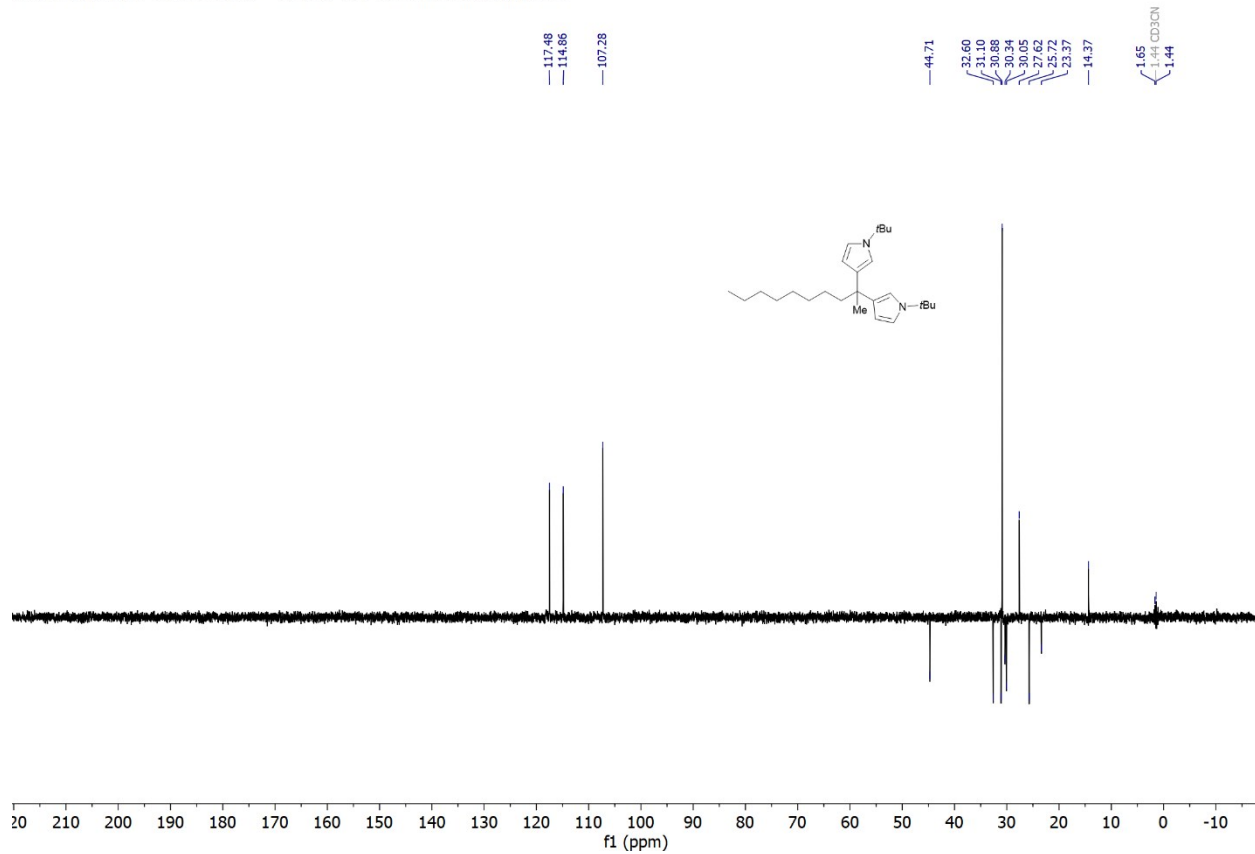

### Preparation of 3,3'-(octane-2,2-diyl)bis(1-(*tert*-butyl)-1*H*-pyrrole) (**11**)

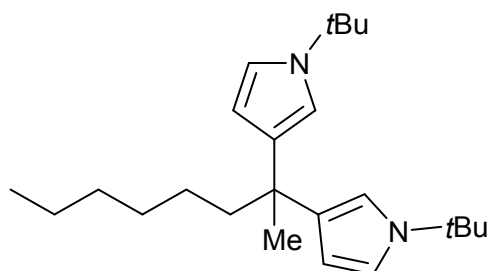

Condition B: To a solution of 1-octyne (11.0 mg, 0.1 mmol) and 1-(*tert*-butyl)-1*H*-pyrrole (30.7 mg, 0.25 mmol) in C<sub>6</sub>D<sub>6</sub> (0.3 mL) was added to a solution of B(C<sub>6</sub>F<sub>5</sub>)<sub>3</sub> (5.1 mg, 0.01 mmol, 10 mol%) in C<sub>6</sub>D<sub>6</sub> (0.2 mL). The reaction was complete after 48 hours at 50 °C. The residue was purified by flash chromatography (eluent: hexane/ethyl acetate = 12/1) on silica gel to afford the product **11** as a colourless oil (20.0 mg, 56% yield).

<sup>1</sup>H NMR (400 MHz, CD<sub>3</sub>CN), δ: 6.69 (t, *J* = 2.4 Hz, 2H), 6.60 (t, *J* = 2.0 Hz, 2H), 5.92 (dd, *J* = 2.8, 1.6 Hz, 2H), 1.83 – 1.78 (m, 2H), 1.47 (s, 3H), 1.45 (s, 18H), 1.26 – 1.23 (m, 6H), 0.86 (t, *J* = 6.4 Hz, 3H).

<sup>13</sup>C{<sup>1</sup>H} NMR (100 MHz, CD<sub>3</sub>CN) δ: 134.61, 117.47, 114.87, 107.30, 54.95, 44.75, 37.99, 32.64, 30.90, 30.81, 27.67, 25.71, 23.39, 14.37.

DEPT<sup>135</sup> NMR (100 MHz, CD<sub>3</sub>CN) δ: 117.54, 114.94, 107.37, 44.81, 32.71, 30.97, 30.87, 27.73, 25.78, 23.45, 14.44.

MS (DART Ionization, *m/z*): 357.3 ([M+H]<sup>+</sup>).

HRMS (DART Ionization, *m/z*): Calcd. for C<sub>24</sub>H<sub>41</sub>N<sub>2</sub><sup>+</sup>, ([M+H]<sup>+</sup>): 357.32697; Found: 357.32746.

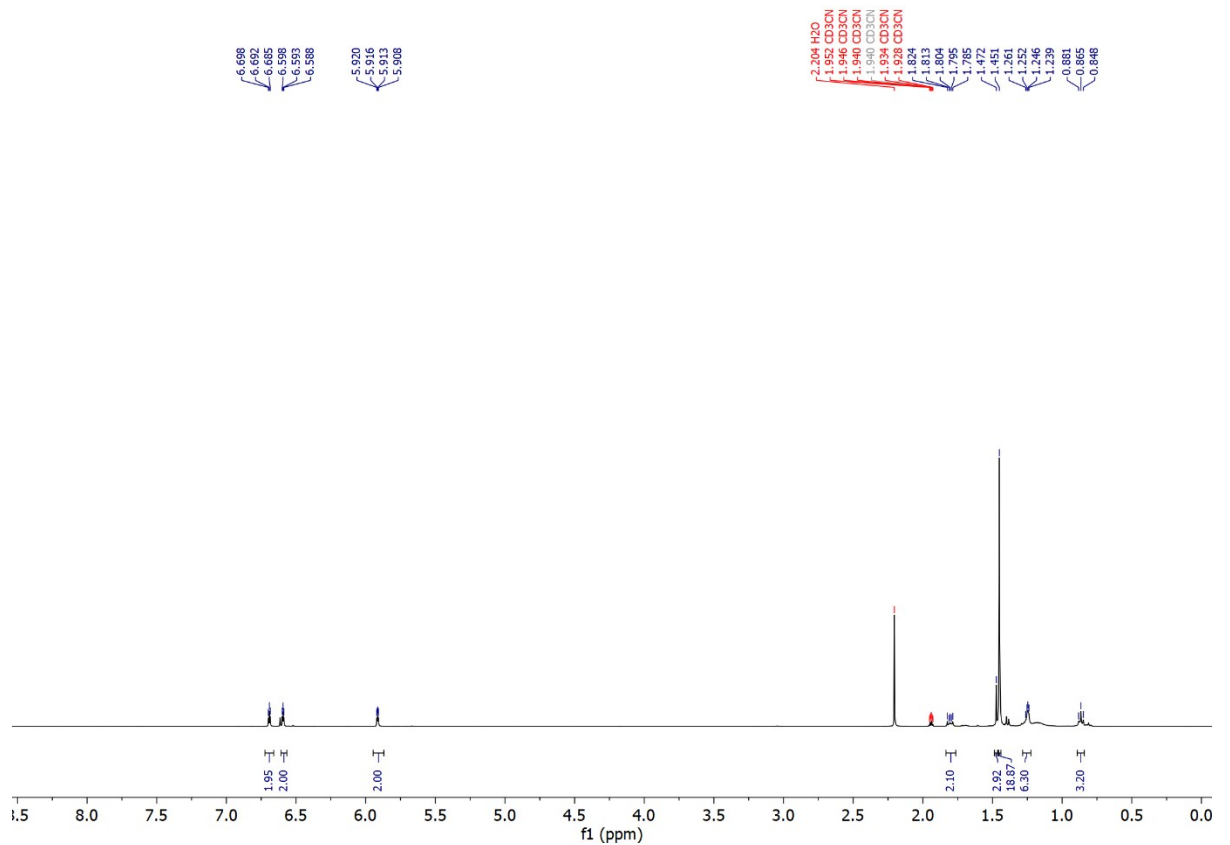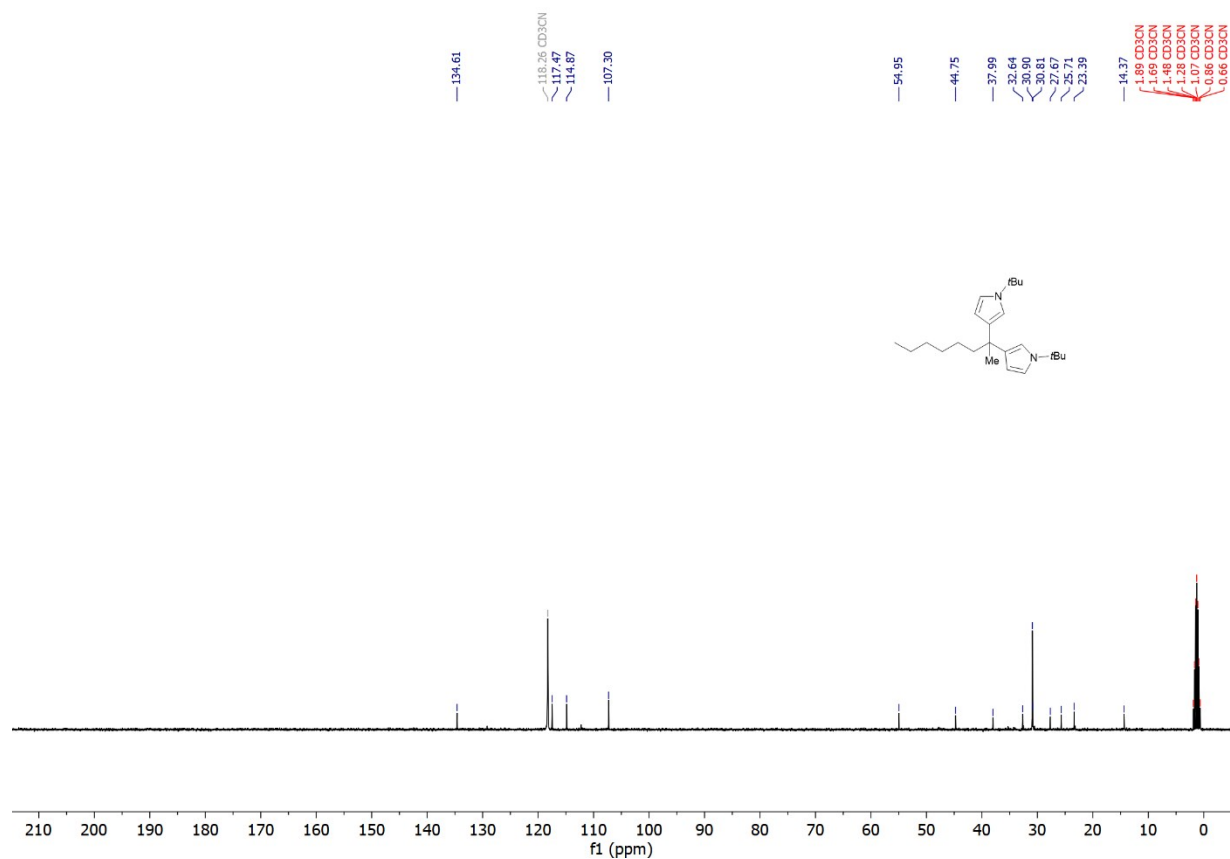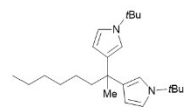



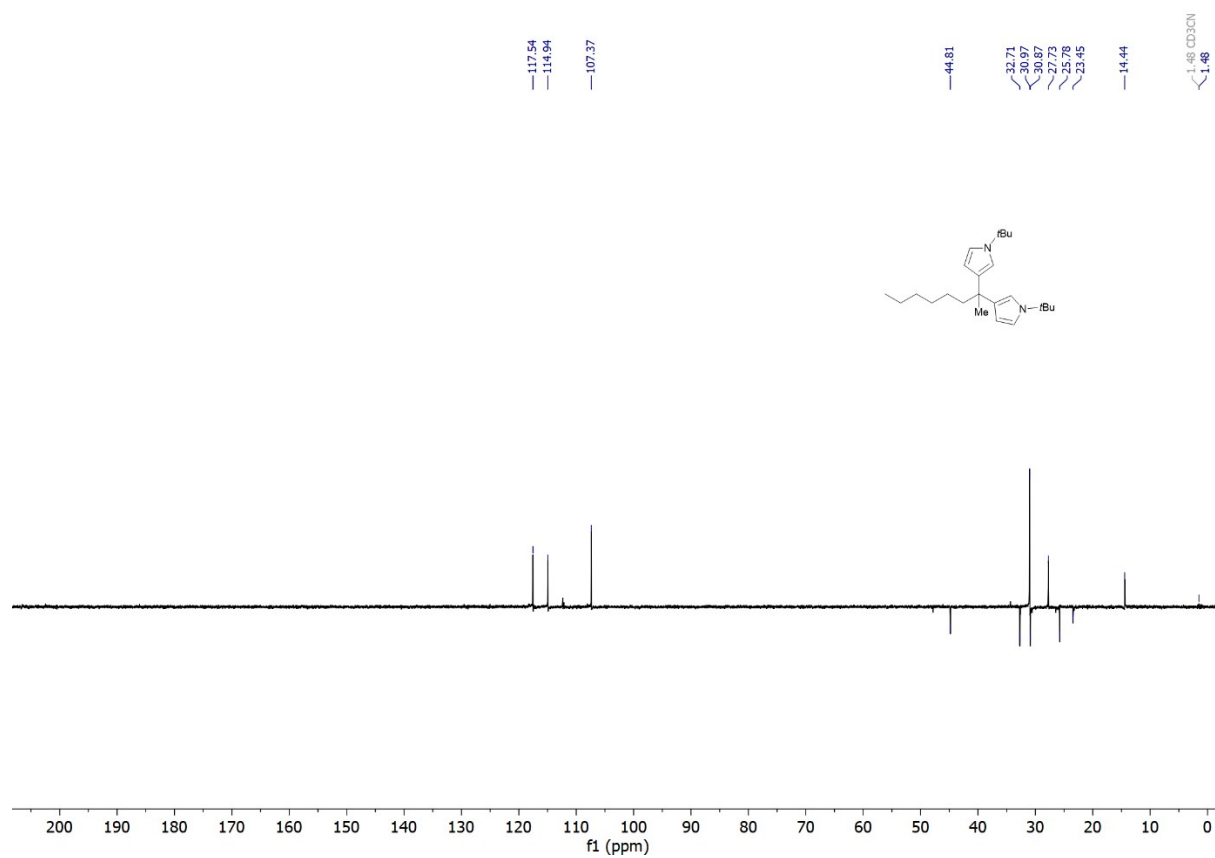

### Preparation of 3,3'-(1-cyclopropylethane-1,1-diyl)bis(1-(*tert*-butyl)-1*H*-pyrrole) (**12**)

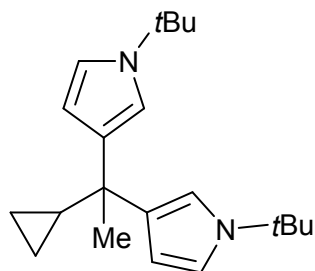

To a solution of cyclopropylacetylene (6.6 mg, 0.1 mmol) and 1-(*tert*-butyl)-1*H*-pyrrole (30.7 mg, 0.25 mmol) in C<sub>6</sub>D<sub>6</sub> (0.3 mL) was added to a solution of B(C<sub>6</sub>F<sub>5</sub>)<sub>3</sub> (5.1 mg, 0.01 mmol, 10 mol%) in C<sub>6</sub>D<sub>6</sub> (0.2 mL). The reaction was complete after 24 hours at 50 °C. The residue was purified by flash chromatography (eluent: hexane/ethyl acetate = 12/1) on silica gel to afford the product **12** as a colourless oil (12.1 mg, 38% yield).

<sup>1</sup>H NMR (400 MHz, CD<sub>3</sub>CN), δ: 6.69 (t, *J* = 2.4 Hz, 2H), 6.60 (t, *J* = 2.0 Hz, 2H), 5.92 (dd, *J* = 2.8, 2.0 Hz, 2H), 1.45 (s, 18 H), 1.41 (s, 3H), 1.28 – 1.19 (m, 1H), 0.32 – 0.27 (m, 2H), 0.12 – 0.08 (m, 2H).

<sup>13</sup>C{<sup>1</sup>H} NMR (100 MHz, CD<sub>3</sub>CN) δ: 132.91, 117.18, 115.73, 108.18, 54.97, 37.90, 30.87, 27.78, 23.58, 1.74.

DEPT<sup>135</sup> NMR (100 MHz, CD<sub>3</sub>CN) δ: 117.03, 115.58, 108.03, 30.72, 27.63, 23.43, 1.62.

MS (DART Ionization, *m/z*): 313.3 ([M+H]<sup>+</sup>).

HRMS (DART Ionization, *m/z*): Calcd. for C<sub>21</sub>H<sub>33</sub>N<sub>2</sub><sup>+</sup>, ([M+H]<sup>+</sup>): 313.26437; Found: 313.26367.

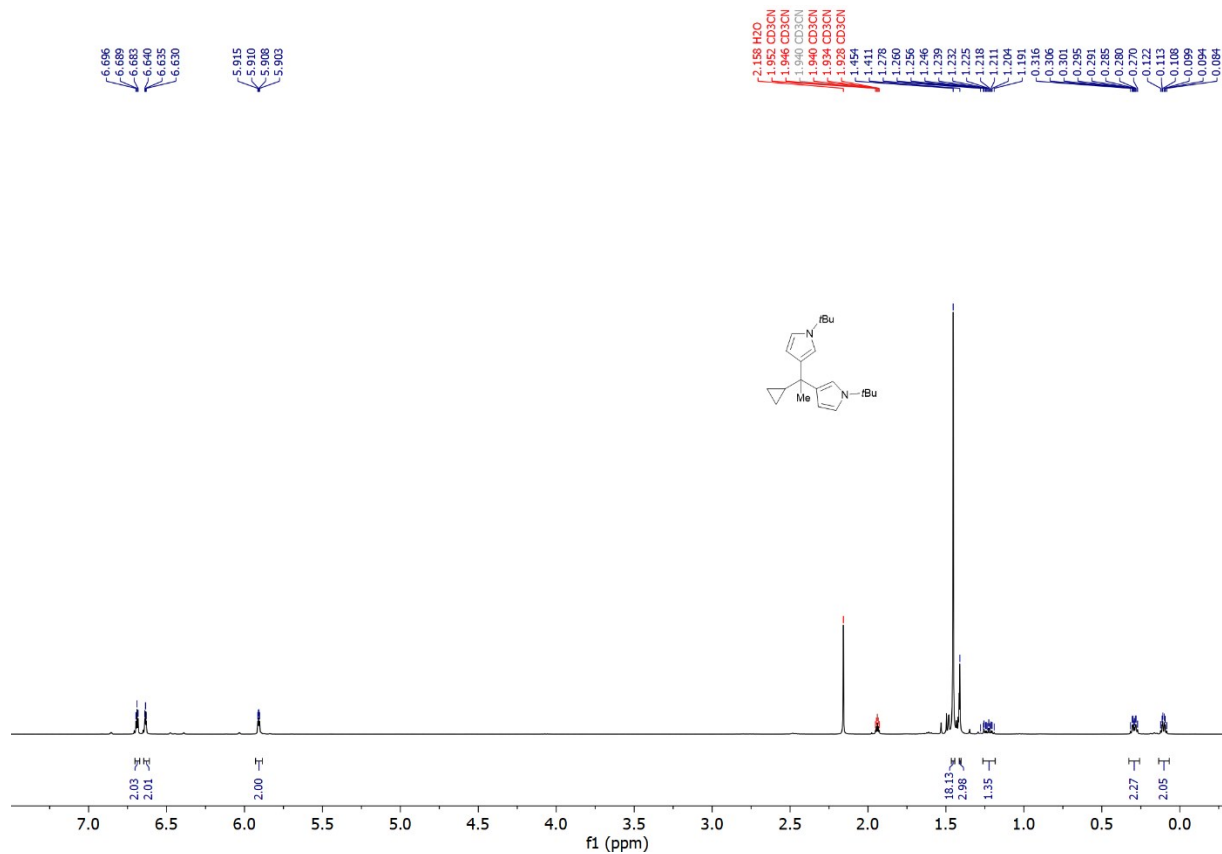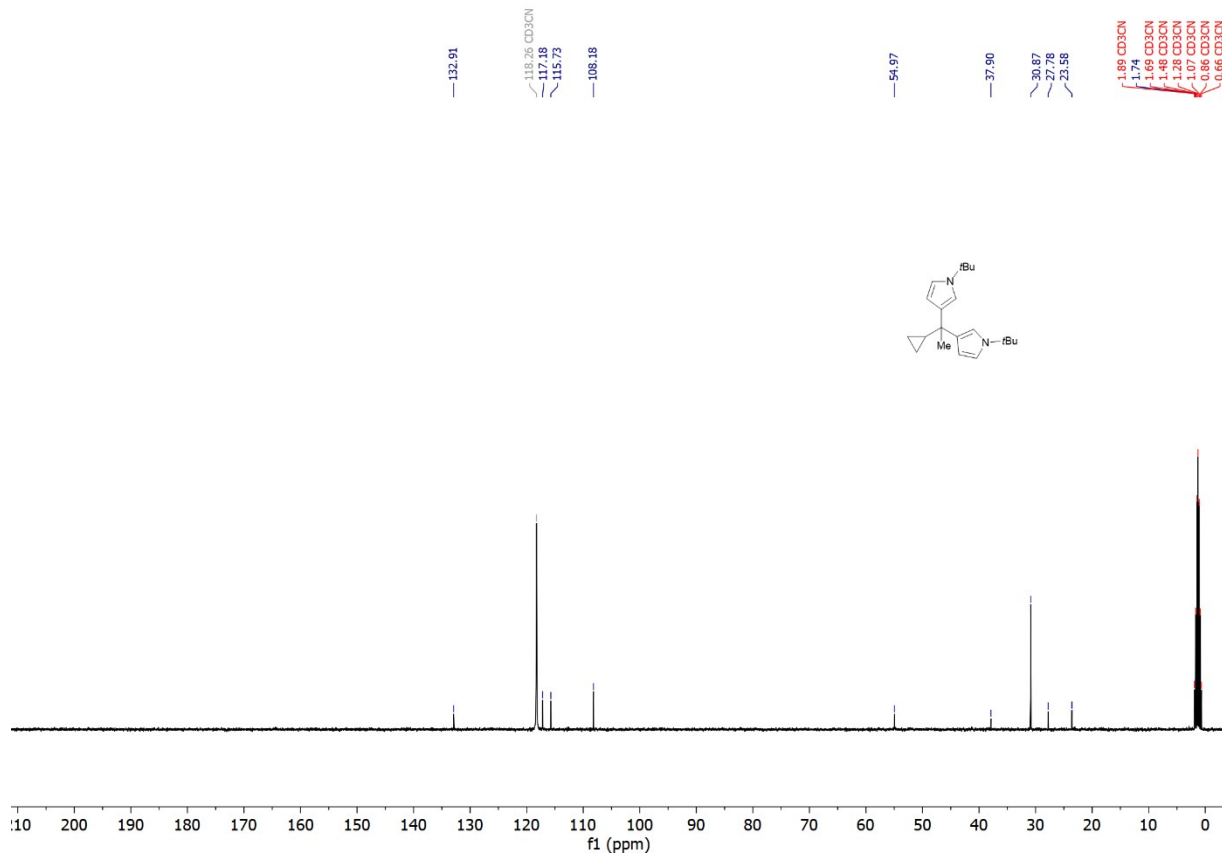



MS (DART Ionization,  $m/z$ ): 619.5 ( $[M+H]^+$ ).

HRMS (DART Ionization,  $m/z$ ): Calcd. for  $C_{42}H_{59}N_4^+$ , ( $[M+H]^+$ ): 619.47397; Found: 619.47473.

20190518\_vnmrs\_500\_BCF-1\_4-erque-PROTON\_01 — BCF-1\_4-erque —

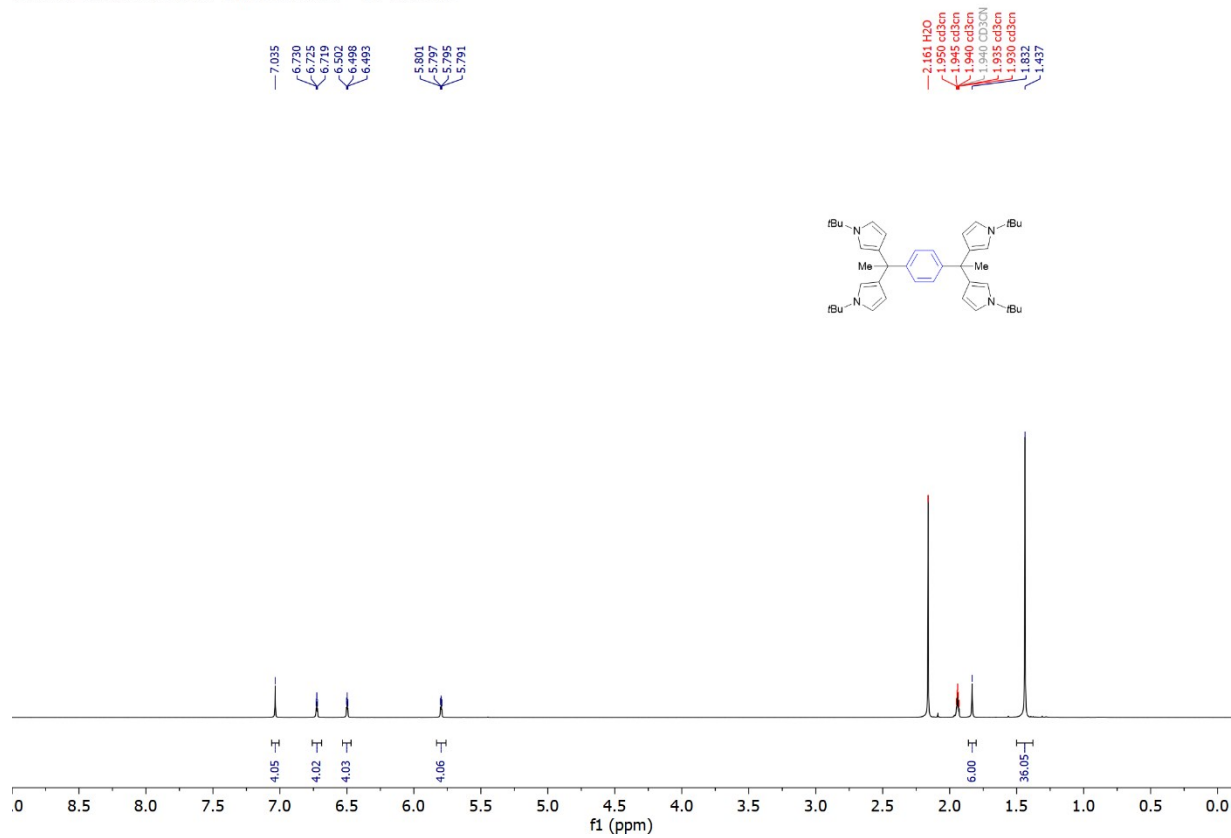

20190518\_vnmrs\_500\_BCF-1\_4-erque-CARBON\_01 — BCF-1\_4-erque —

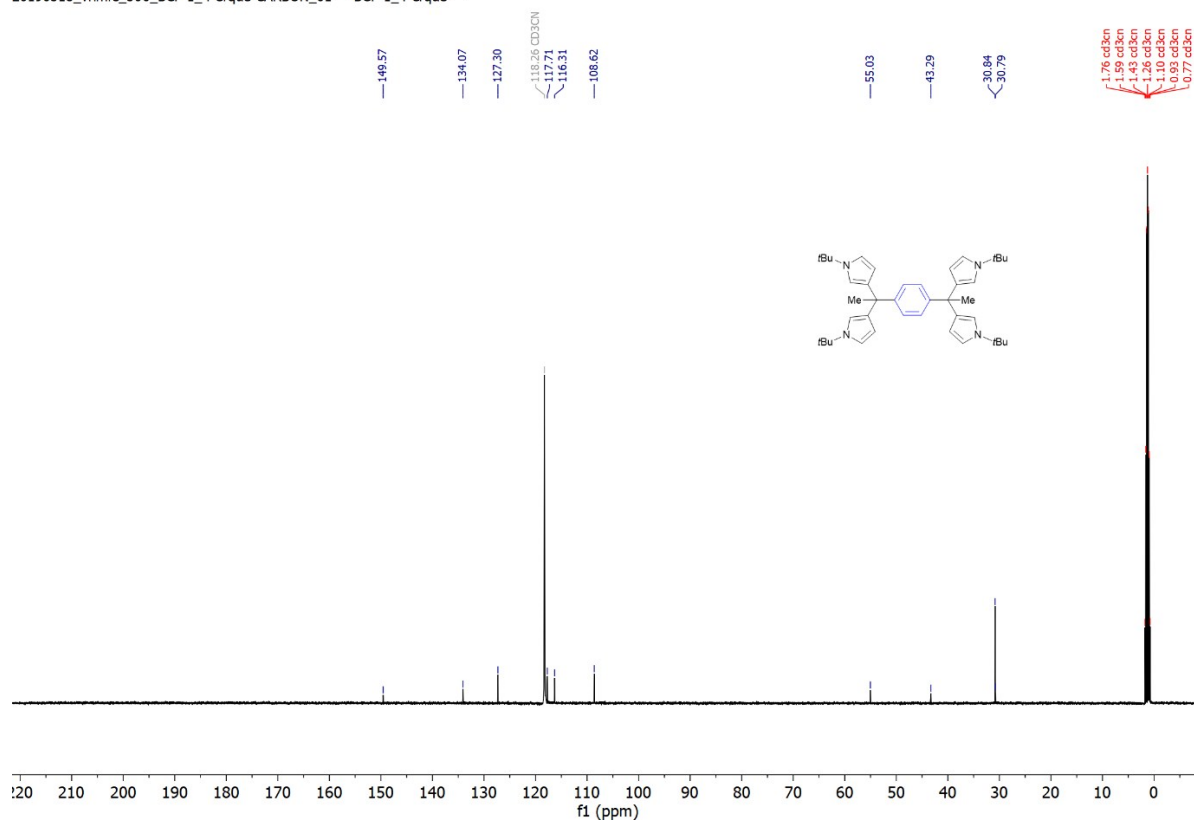

20190518-jguo2-BCF-1,4-erque.1.fid — bbo\_DEPT135 CD<sub>3</sub>CN /home/data/jguo2 134

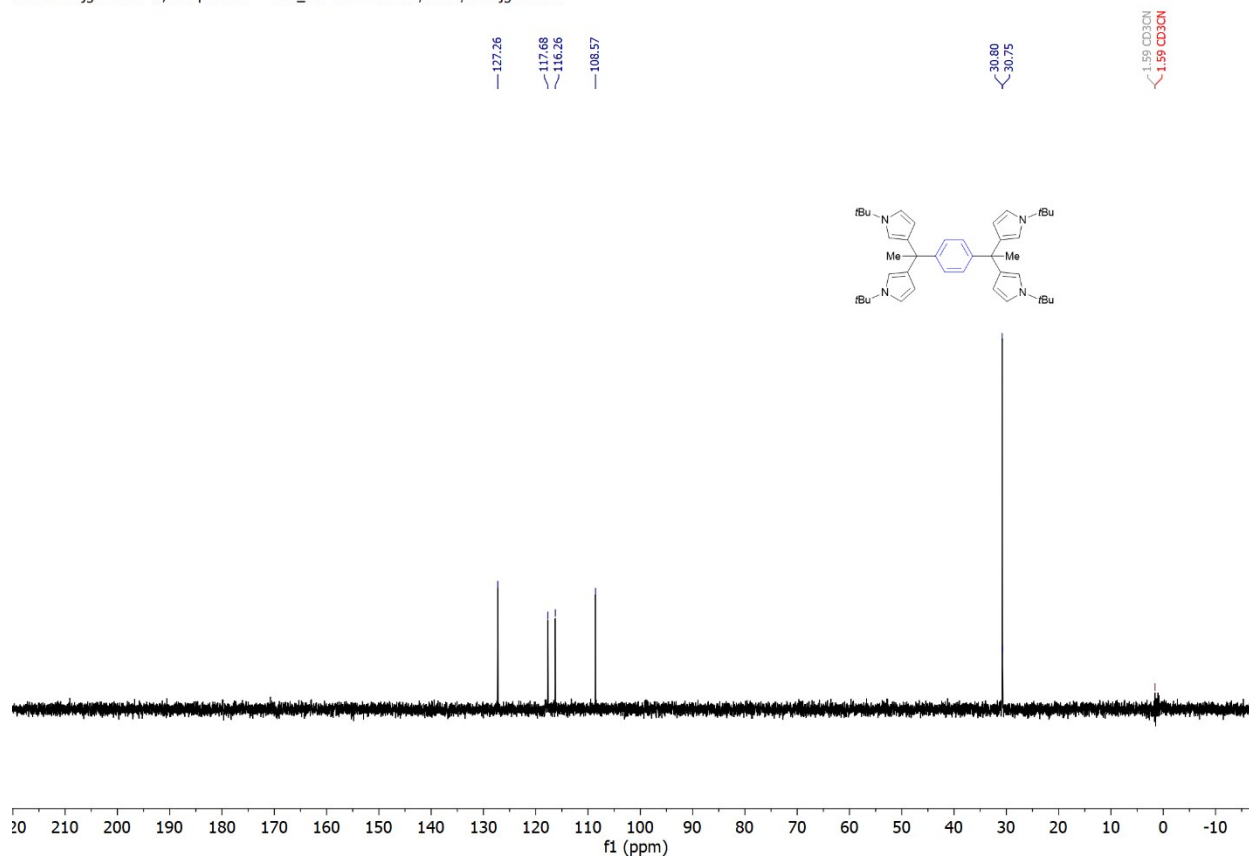

**Preparation of 3,3'-(1-phenylethane-1,1-diyl)bis(1-((3s,5s,7s)-adamantan-1-yl)-1*H*-pyrrole) (14)**

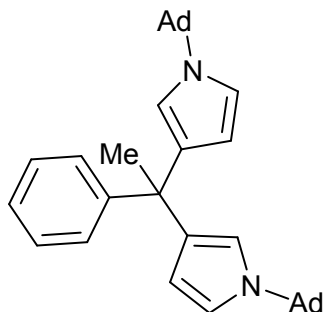

To a solution of phenylacetylene (10.2 mg, 0.1 mmol) and 1-((3s,5s,7s)-adamantan-1-yl)-1*H*-pyrrole (50.3 mg, 0.25 mmol) in C<sub>6</sub>D<sub>6</sub> (0.3 mL) was added to a solution of B(C<sub>6</sub>F<sub>5</sub>)<sub>3</sub> (5.1 mg, 0.01 mmol, 10 mol%) in C<sub>6</sub>D<sub>6</sub> (0.2 mL). The reaction was complete after 5 hours at room temperature. The residue was purified by flash chromatography (eluent: hexane/ethyl acetate = 8/1) on silica gel to afford the product **14** as a white solid (42.8 mg, 85% yield).

<sup>1</sup>H NMR (400 MHz, CD<sub>3</sub>CN), δ: 7.23 – 7.16 (m, 4H), 7.12 – 7.08 (m, 1H), 6.77 (t, *J* = 2.4 Hz, 2H), 6.54 (t, *J* = 2.0 Hz, 2H), 5.92 (dd, *J* = 2.8, 2.0 Hz, 2H), 2.14 (s, 6 H), 2.01 (d, *J* = 3.2 Hz, 12H), 1.85 (s, 3H), 1.74 (s, 12H).

<sup>13</sup>C{<sup>1</sup>H} NMR (100 MHz, CD<sub>3</sub>CN) δ: 153.15, 133.54, 128.50, 128.14, 126.00, 116.71, 115.19, 108.39, 55.36, 44.49, 43.86, 36.75, 30.91, 30.69.

MS (DART Ionization, *m/z*): 505.36 ([M+H]<sup>+</sup>).

HRMS (DART Ionization, *m/z*): Calcd. for C<sub>36</sub>H<sub>45</sub>N<sub>2</sub><sup>+</sup>, ([M+H]<sup>+</sup>): 505.36773; Found: 505.35716.

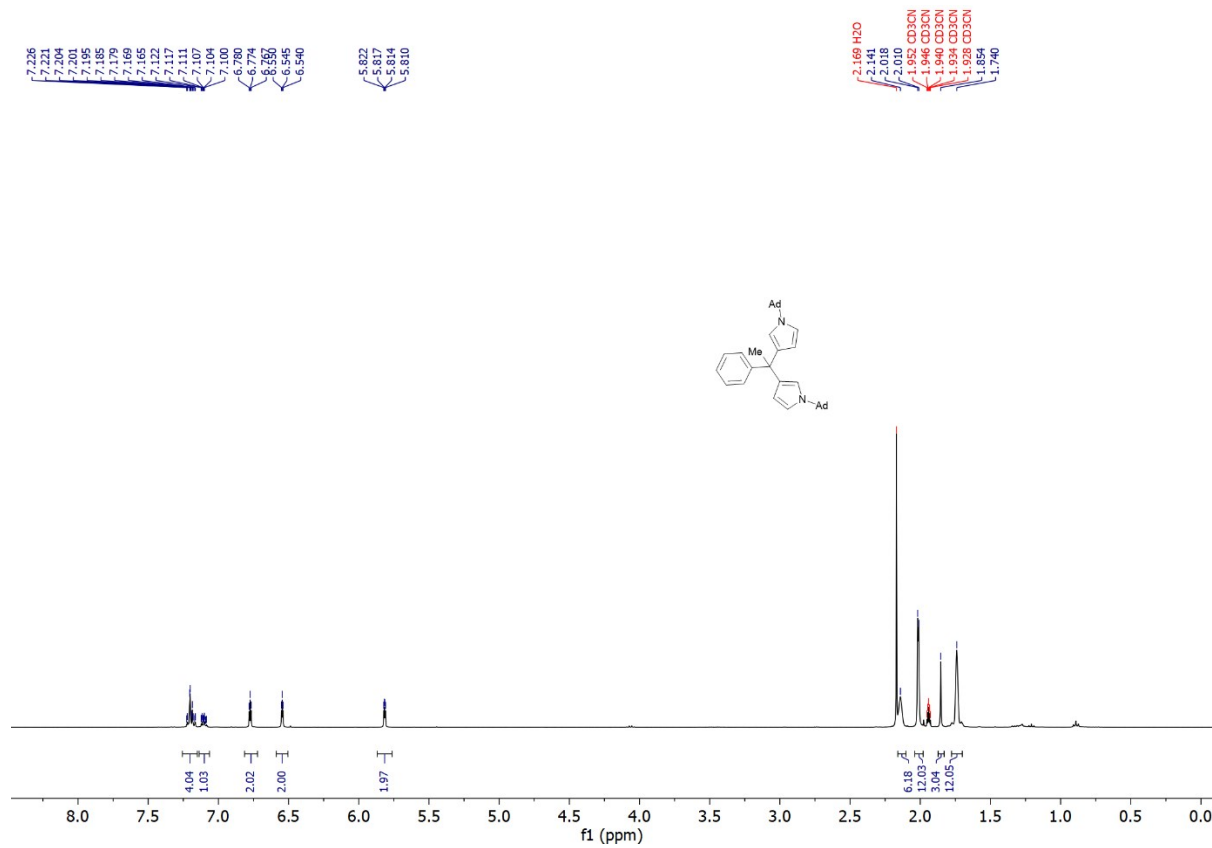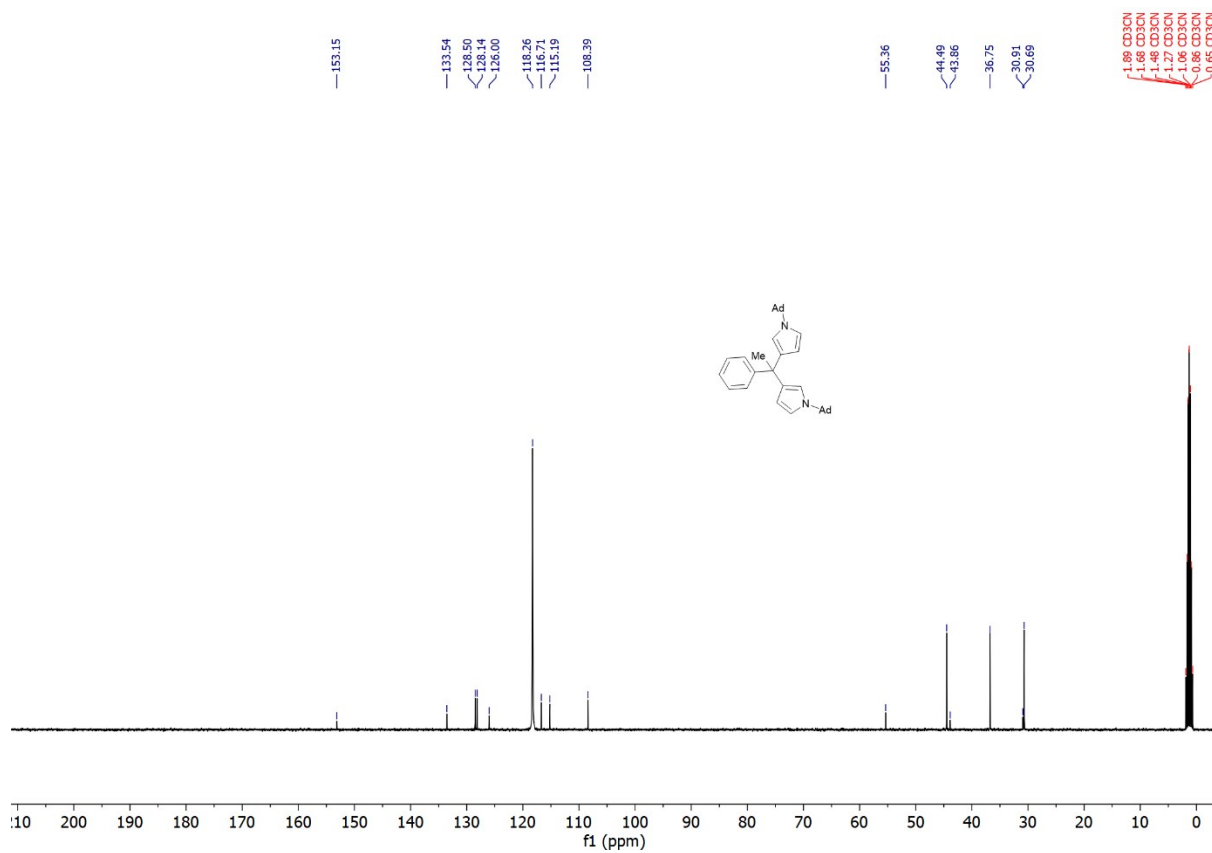



## Single crystal X-ray crystallography

X-ray crystallographic data were collected on a Bruker Apex2 X-ray diffractometer at 150±2 K using a graphite monochromator with MoK( $\alpha$ ) radiation ( $\lambda$  = 0.71073 Å) and the Bruker APEX3 software<sup>4</sup> package. Suitable crystals were selected and mounted in Paratone-N oil on a MiTeGen cryoloop, then placed in the cold (N<sub>2</sub>) stream of the diffractometer. Unit cell parameters were determined from consecutive scans at different orientations. The data were integrated using the SAINT software package<sup>5</sup> and a multi-scan absorption correction was applied using SADABS.<sup>6</sup> All structures were solved and refined by intrinsic phasing in the SHELXTL suite of programs using XT and refinement by full-matrix least-squares on F<sup>2</sup> using XL.<sup>7-8</sup> All non-hydrogen atoms were subjected to anisotropic refinement and carbon-bound hydrogen atoms were placed in calculated positions using an appropriate riding model and coupled isotropic temperature factors (U<sub>iso</sub>(H) = 1.2U<sub>eq</sub>(C)).

## References

- 1 S. Nomiyamaa and T. Tsuchimoto, *Adv. Synth. Catal.*, 2014, **356**, 3881.
- 2 M. A. Dureen, C. C. Brown and D. W. Stephan, *Organometallics.*, 2010, **29**, 6422.
- 3 D. J. Cassar, E. Nagaradja, D. C. D. Butler, D. Villemin and C. J. Richards, *Org. Lett.*, 2012, **14**, 894.
- 4 C. Körner, P. Starkov and T. D. Sheppard, *J. Am. Chem. Soc.*, 2010, **132**, 5968.
- 5 A. Mallick, J. Oh, D. Kim, M. Ishida, H. Furuta and H. Rath, *Chem. Eur. J.*, 2016, **22**, 5504.
- 6 APEX3, Bruker-AXS: Madison, Wisconsin, USA, 2016.
- 7 SAINT, Madison, Wisconsin, USA, 1998.
- 8 Blessing, R. H., SADABS. In Program for absorption corrections using Siemens CCD based on the method of Robert Blessing, *Acta Cryst.*: 1995; Vol. **A51**, pp 33-38.
- 9 G. M. Sheldrick, SHELXS-97, University of Göttingen: Göttingen, Germany, 1997.
- 10 G. M. Sheldrick, *Acta Cryst.* 2015, **A71**, 3-8.
